# Supplementary material for: The increase in cell volume and nuclear number of the koji-fungus Aspergillus oryzae contributes to its high enzyme productivity
Source: bioRxiv preprint, doi:10.1101/2025.04.06.647446, version 3 (2025-08-09)
Supplement: Table S2 [file 647446_file04.xlsx]

## Sheet: TPM
	Thick			Thin
	Base	Middle	Tip	Base	Tip
Name	TPM	TPM	TPM	TPM	TPM
AO090009000001	0	0	0	0	0.0197504
AO090009000002	0	0	0	12.7897	0
AO090009000003	0	0	0	0	0
AO090009000006	0	0	0	0	0
AO090009000008	0	0	1.11389	0	0
AO090009000009	9.2066	0	0	0	0
AO090009000010	0	0	0	0	0
AO090009000011	0	0	0	0	0
AO090009000012	0	0	0	0	0
AO090009000014	0	0	0	0	0
AO090009000716	0	0	0	71.9341	89.7862
AO090009000017	0	0	0	0	0
AO090009000018	0	0	0	0	0
AO090009000019	0	0	0	0	0
AO090009000020	0	0	0	0	0
AO090009000021	0	0	0	0	0
AO090009000022	0	0.173494	46.0719	0	0
AO090009000023	0	0	0	0	0
AO090009000024	0	0	0	0	0
AO090009000025	0	0	0	57.0251	0
AO090009000026	0	0	0	0.08869	0
AO090009000027	0	0	0	0	0
AO090009000028	0	0	0	0	0
AO090009000029	0	0	0	0	0.0385024
AO090009000030	0	0	0	0	0
AO090009000031	0	0	0	0	0
AO090009000032	0	0	0	0	0
AO090009000033	0	0	0	0	0
AO090009000034	0	0	0	0	0
AO090009000035	0	0	0	0	0
AO090009000036	0	0	0	0.253091	0
AO090009t00001	0	0	0	0	0
AO090009000037	0	0	0	0	0
AO090009000038	0	0	0	0	0
AO090009000039	0	0	0	0	0
AO090009000040	0	0	0.347826	0	0
AO090009000042	0	0	0	0	0
AO090009000043	0	0	0	0	0
AO090009000044	0	0	0	0	0
AO090009000046	0.321632	2.95968	50.5323	0	0
AO090009000047	0	0	0	0	0
AO090009000049	0	0	0	0	0
AO090009t00002	0	0	0	0	0
AO090009000050	0	19.5419	0.0991871	28.5118	0.290056
AO090009000051	0	0	0	0	0
AO090009000052	0	0	0	0	0
AO090009000053	0	0	0.196021	0	0
AO090009000054	0	0	60.1997	0	0
AO090009t00003	0	0	0	0	0
AO090009000055	5.53448	31.3419	37.8924	19.4421	44.9201
AO090009000717	30.2007	64.6166	0.0202189	0.0262039	0
AO090009000060	33.4327	187.429	272.227	7.96023	170.706
AO090009000061	11.7949	0	0.0896914	18.831	0
AO090009000062	0	0	0	0	23.0391
AO090009000063	0	0	0	3.55499	0
AO090009000065	0	0	0	0	0
AO090009000066	0	0	0	0	0
AO090009000067	0	0	0	0	0
AO090009000068	0.180539	0.0363417	0	0	0
AO090009000069	0	0	0	0	0
AO090009000070	0	0	24.1257	13.0538	0
AO090009000071	0	0	0.0234827	1.52169	0
AO090009000073	0.598168	0	0.405379	0	0.0290554
AO090009000074	0	0	0	0	0
AO090009000075	0	0	0	0	0
AO090009000076	0	0	0	0	0
AO090009000078	0	0	0	0	0
AO090009000079	8.0592	0	0	51.4516	109.319
AO090009000080	0.574533	0	0	0	0
AO090009000082	3.8785	3.65825	0	39.9276	63.3543
AO090009000083	469.365	431.115	0	228.63	47.6022
AO090009000086	0	0	0	0	0
AO090009000087	40.6096	27.0272	0	0	0
AO090009000088	0	0	0	0	0
AO090009000090	0	0	0	0	0
AO090009000091	0	0	0	0	0
AO090009000092	0	0	0	0	0
AO090009000093	36.9953	0	0	4.45054	0
AO090009000094	19.271	0	0	0	0
AO090009000095	0	0	53.8532	3.17461	143.176
AO090009000097	0	0	0	0	0
AO090009000098	0	0	0	0	0
AO090009000099	11.3239	14.6473	0	0	0
AO090009000100	0	0	0	0	0
AO090009000101	0	0	45.2238	0	0
AO090009000102	1.44688	0	0.0333933	0	0
AO090009000103	0	0	0	0	0
AO090009000104	0	0	0	0	0
AO090009000105	0	0	0	0	0
AO090009000106	0	0	0	0	0
AO090009000107	0	0	0	0	0
AO090009000109	0	0	0	0	0
AO090009000110	0	0	0	0	0
AO090009000111	0	0	0	0	0
AO090009000113	0	0	0	0	0
AO090009000114	0	0	0	0	0
AO090009000115	0	0	0	0	0
AO090009000116	0	0	0	0	0
AO090009000117	349.007	447.247	1254.88	1003.27	1437.83
AO090009000118	0	0	0	0	0
AO090009000119	0	0	0	0	0
AO090009000120	0.03964	0	0	0	0
AO090009000121	19.723	0	0	0	0
AO090009t00004	0	0	0	0	0
AO090009000122	0	0	0	7.19024	2.926
AO090009000123	0	0	0	0	52.041
AO090009000721	0	0	0	92.81	105.673
AO090009000126	0	0	0	213.407	176.144
AO090009000128	0	0	0	0	0
AO090009000129	0	0	0.0574907	0	0
AO090009t00005	0	0	0	0	0
AO090009000130	18.1911	51.8949	0	99.0471	18.9169
AO090009000131	0	0	0.0174635	0	0
AO090009000132	0	9.17651	0	0	0
AO090009000133	0	0	0	0	0
AO090009000134	0	0	0	0	79.7049
AO090009000135	0	0	0	0	0
AO090009000136	0	0	0	0	0
AO090009t00006	0	0	0	0	0
AO090009000138	0	0	0	0	67.9653
AO090009000139	0	0	48.5236	0	0
AO090009000140	0	0	0	13.4795	13.1245
AO090009000141	0	0	0	0	0
AO090009000142	0	0	0	0	0
AO090009000143	0	0	0	0	0
AO090009000144	80.6162	101.192	183.639	0	56.5957
AO090009000145	6.62483	26.7602	0	0	0
AO090009000146	0	0.0347746	0	0.0490893	0
AO090009000148	0.45639	0	58.5114	306.484	258.974
AO090009000149	425.141	555.015	878.343	231.874	872.398
AO090009000151	35.2678	166.5	189.291	59.8293	61.4726
AO090009000153	0	0	0	0	0
AO090009000154	0	0	0	0	0
AO090009000156	0	0	0	0	0
AO090009000159	0	0	0.105138	0	0
AO090009000160	0	0	27.0337	0	0
AO090009000161	0	0	24.5633	0	0
AO090009000162	0	0	0	0	0
AO090009000163	10.8317	0	0	68.174	0
AO090009000164	0	0	0	0	0
AO090009000165	0	0	0	0	0
AO090009000166	2.78397	24.7551	9.44797	196.877	109.645
AO090009000168	92.2579	126.442	72.6357	29.2192	2.17833
AO090009000169	9.09814	0	0	12.0032	54.5156
AO090009000171	32.0714	0	56.8204	0	0
AO090009000172	0	0	1.15652	0	0
AO090009000173	0	0	0	0	0
AO090009000174	175.365	272.037	120.931	233.016	314.126
AO090009000175	0	0	0	0	0
AO090009000176	64.8828	5.08061	51.6016	7.13445	0.741368
AO090009000178	14.2375	118.382	114.923	1.41668	125.713
AO090009000179	0	40.3066	0	0	0
AO090009000180	0	0	0	0	0
AO090009000181	0	0	0	0	0
AO090009000182	10.6762	0	0	0	0
AO090009000183	0	0	56.6349	55.6822	61.9705
AO090009000185	6.6373	0.410043	63.0342	8.27734	0.707466
AO090009000186	0	0	1.03077	0	0
AO090009000187	32.7399	73.8215	19.2421	0.0646061	0
AO090009000188	57.6501	49.0785	146.715	116.929	0
AO090009000189	29.5644	53.8135	84.6925	24.6917	55.6784
AO090009000190	180.621	383.716	462.488	110.334	210.684
AO090009000191	10.2851	49.5831	28.5515	90.4765	66.1554
AO090009000718	8.98816	0.102967	0.016022	0	0
AO090009000195	41.5756	39.7085	55.0091	0	63.1896
AO090009000196	108.399	103.159	95.8109	66.2799	181.643
AO090009000197	14.0143	134.201	93.3381	119.909	94.4985
AO090009000198	32.6283	0.860583	0	0.101236	0
AO090009000199	253.513	166.555	344.01	140.38	319.673
AO090009000200	12.1184	29.5723	0	90.9659	0
AO090009000201	52.0375	65.7163	33.8149	376.814	248.548
AO090009000202	1657.31	1505.81	854.849	725.103	885.307
AO090009000203	465.887	321.25	200.814	0.596138	174.147
AO090009000205	116.833	74.0627	204.491	163.714	261.217
AO090009000208	0	0	33.0085	33.6531	225.411
AO090009000209	0	0	47.7217	51.4346	380.778
AO090009000210	0	0	0	0.0499066	67.8475
AO090009000211	5.45451	1.57209	2.36468	0	0
AO090009000212	90.2525	31.134	45.8625	24.6603	0
AO090009000213	0	0	0	54.2578	0
AO090009000214	86.2043	0	0	0	0
AO090009000215	155.442	387.783	170.324	80.1838	73.465
AO090009000216	18.5742	3.64179	0	0	0
AO090009000217	57.1069	0	1.65672	0	64.8304
AO090009000218	0	0	0.0658986	31.8561	0
AO090009000219	28.8063	10.7931	0	9.648	103.062
AO090009000222	39.5607	225.411	56.8901	127.619	79.8176
AO090009000223	0.19488	0	30.9355	44.449	1.04127
AO090009000225	101.911	0.180346	30.8406	48.4982	98.2542
AO090009000226	2.29273	17.6974	1.91411	0	16.8207
AO090009000228	0	0.0833862	0	44.8481	103.697
AO090009000229	3.19038	2.69728	59.5981	6.76905	0
AO090009000230	0	0	32.5789	0	0
AO090009000231	0	0	0	0	0
AO090009000232	74.5567	88.482	60.7915	113.76	93.2232
AO090009000233	128.822	154.093	147.634	172.612	146.108
AO090009000234	0	36.7564	0	0	0
AO090009000235	49.1942	49.9525	0	51.9925	0
AO090009000236	0	77.9329	0.673702	34.3428	185.657
AO090009000237	0	0	0	0	0
AO090009000238	25.2806	36.1997	0.119847	14.2897	109.668
AO090009000239	91.5353	15.16	116.973	67.7011	137.362
AO090009000240	4.16428	0	0	0	0
AO090009000241	6.95309	0	0	0	0
AO090009000242	179.397	112.157	210.862	197.28	103.003
AO090009000244	15.1301	1.1495	27.9505	26.3288	20.4311
AO090009000246	0	0	0	0	0
AO090009000247	0	0	0	0	0
AO090009000248	0	0	0	0	0
AO090009000249	0	0	0	0	0
AO090009000250	0	35.11	0	66.9996	76.8016
AO090009t00007	0	0	0	0	0
AO090009t00008	0	0	0	0	0
AO090009t00009	0	0	0	0	0
AO090009000252	0	0	0	0	0
AO090009000253	0	0	0	0	0
AO090009000719	39.9397	50.2139	158.134	0	0
AO090009000257	83.3183	83.0227	344.53	58.3824	20.3351
AO090009t00010	0	0	0	0	0
AO090009000258	0	0	22.2824	0	0
AO090009000259	56.5305	37.4426	186.264	44.4588	93.895
AO090009000260	0	11.6827	0.291193	0	0
AO090009000261	12.9279	15.7171	9.54074	31.6789	92.9827
AO090009000262	248.567	645.076	467.071	428.488	188.856
AO090009000264	2518.88	2042.46	2245.66	2127.75	837.243
AO090009000265	25.4842	11.0813	38.3212	50.1405	55.3051
AO090009000266	0	0	0	0	0
AO090009000267	34.7775	68.5212	0	0	0
AO090009000268	25.1264	4.49169	16.9401	24.0417	11.0781
AO090009000269	1088.06	1252.58	2786.14	1185	2114.1
AO090009000270	1.92171	0	53.816	37.0573	86.3216
AO090009000272	0	0	0	0	32.7168
AO090009000273	0	0	0	0	66.0289
AO090009000275	12.6102	77.3276	0	0	0
AO090009000276	0	0	0	0	0
AO090009000277	0	0	2.86092	0	0
AO090009000278	0	0	0	0	0
AO090009t00011	0	0	0	0	0
AO090009000279	0	0	0	0	0
AO090009000280	0	0	0	0	0
AO090009000281	455.398	870.985	830.177	774.649	358.541
AO090009000282	17.5633	21.1428	71.8194	44.8921	127.174
AO090009000284	73.4641	33.3177	0	122.818	125.92
AO090009000285	23.6205	0	0	0	0
AO090009000286	0	0.020977	0.0228486	0	62.4739
AO090009000287	44.7258	82.7761	310.818	106.37	68.4833
AO090009000288	0	24.4368	0	0	0
AO090009000289	373.131	576.135	512.033	634.895	917.08
AO090009000290	0	0	0	0	0
AO090009000291	1.55192	44.6402	206.977	60.8263	36.8572
AO090009000292	0	0	28.4043	0	0.0505992
AO090009000293	98.5494	136.897	291.337	34.325	130.054
AO090009000294	54.5013	41.0456	0	138.004	125.653
AO090009000295	300.201	84.2637	121.757	447.044	310.038
AO090009000296	0	0	62.0692	0	0
AO090009000297	0	0	0.0916056	0	0
AO090009000298	0	55.6703	0	0	0
AO090009000299	0	0	0	0.465622	0
AO090009000300	45.4627	3.1337	79.6687	121.092	0
AO090009000301	141.97	247.666	347.717	460.509	556.539
AO090009000302	149.942	192.052	119.891	26.3943	30.3733
AO090009000303	38.6914	71.3962	110.425	23.8913	51.1911
AO090009000304	98.2534	378.854	103.722	4.22684	563.466
AO090009000305	0	0	0	0	0
AO090009000307	65.5234	83.8297	87.0789	21.3107	16.8403
AO090009000308	14.4728	0	0	0	0
AO090009000309	129.735	45.4778	113.053	24.1165	0
AO090009000310	257.079	267.549	5.38183	86.37	150.546
AO090009000311	0.342846	1.687	79.3473	56.3318	147.324
AO090009000312	94.499	64.4263	0.167882	181.894	78.6873
AO090009000313	174.407	515.666	346.553	224.568	188.266
AO090009000314	59.1279	200.786	82.6591	121.375	175.933
AO090009000315	123.188	67.4802	101.637	185.394	119.701
AO090009000316	0	0	0	20.66	51.6448
AO090009000317	0	0	2.74883	34.4086	87.3288
AO090009000318	0	0	0	53.3828	0
AO090009000320	44.2236	34.3112	27.1008	26.5116	5.43984
AO090009000321	0	0	0	0	0
AO090009000322	0	0	0	3.67547	0
AO090009000323	0	0	0	0	0
AO090009000324	0	0	0	0	0
AO090009000325	26.6036	50.1232	0.746908	0	36.6201
AO090009000327	0	0	0	0	99.3789
AO090009000328	0.0564749	16.643	59.5844	50.4541	256.913
AO090009000329	71.6102	52.4827	0	0	0.272088
AO090009000330	0	0	13.1622	0	0
AO090009000332	27.9065	46.1312	0	48.5403	0
AO090009000333	165.846	76.3018	167.991	196.067	33.3042
AO090009000334	81.0604	55.063	0	0	104.994
AO090009000335	0	15.5034	0	0	0
AO090009000336	22.057	13.5778	21.6321	0	72.6926
AO090009000337	20.2019	42.0898	147.801	26.3819	22.295
AO090009000338	0	0	0	0	0
AO090009000339	0	0	0	0	0
AO090009000340	0	0	0	0	0
AO090009000342	0	0	0	0	0
AO090009000343	0	0	0	0	0
AO090009000344	0	0	0	0	0
AO090009000345	62.3499	116.558	49.7492	0	1.50274
AO090009000346	187.844	153.699	361.757	475.317	854.441
AO090009000347	0	5.43099	0.466372	49.499	118.497
AO090009000348	14.2235	27.0676	58.9883	0	0
AO090009000349	7.8553	7.9011	11.6741	0.0143546	0
AO090009000350	6.90815	6.0073	0	0	0.26248
AO090009000351	0	0	0	0	0
AO090009000352	0	0	0	0	0
AO090009000354	0.791214	47.1432	0	0	0
AO090009000355	172.235	223.12	53.8937	51.7291	7.55335
AO090009000356	0	36.898	0	0	15.9975
AO090009000357	6.2566	4.86789	0	0.359567	41.13
AO090009000359	0	58.097	29.4654	0	0
AO090009000360	0.133014	23.7764	33.9665	42.0051	0
AO090009t00012	0	0	0	0	0
AO090009000361	0.676696	61.36	156.998	56.1481	178.281
AO090009000362	0	82.714	0	0	68.5484
AO090009000363	0	0.593176	0	0	0
AO090009000365	17.0654	84.9428	5.25691	0	0
AO090009000366	53.2322	77.4165	210.552	116.276	87.3896
AO090009000369	0	0	0	0	0
AO090009000370	0	0	0	44.1093	0
AO090009000371	42.8096	0.615527	0	0	0
AO090009000372	23.6217	38.5672	74.5058	0	90.8883
AO090009000373	0	0	0.0370284	0	0
AO090009000374	20.8737	0	0	0	0
AO090009000375	0	0	0	0	0
AO090009000376	44.0924	0	0.0238704	61.7178	0
AO090009000377	3082.61	4295.53	2984.12	2690.31	1050.58
AO090009000378	91.1248	214.562	298.709	159.955	219.364
AO090009000379	67.9469	238.983	97.4309	99.0694	8.35894
AO090009000380	4.7597	0	11.5551	54.4137	0
AO090009000381	0	0	40.2563	0	0
AO090009000382	0	78.5936	45.7529	0.0506372	98.0243
AO090009000383	0	0	28.1201	0	47.7032
AO090009000384	0	1.39451	0	0	0
AO090009000385	1.53385	32.0594	0	0	160.292
AO090009000386	0	1.91313	0	5.13123	21.3283
AO090009000388	0.52656	0.0184338	0.0200785	89.0729	81.6889
AO090009000389	50.6897	0	0	0	19.8791
AO090009000390	7.027	14.2538	0	0	0.216613
AO090009000391	18.9798	0	0	68.6895	0
AO090009000392	0	0	0	0	0
AO090009000393	0	0	0	0	0
AO090009000394	0.354011	74.1396	0.496761	13.4797	0
AO090009000395	5612.69	3570.21	2653.58	3325.05	1238.45
AO090009000396	229.9	188.312	268.179	109.435	147.21
AO090009000397	66.0177	70.0376	0	0	90.9527
AO090009000398	40.3953	44.6218	0	0	205.492
AO090009000400	8.78011	28.5611	50.8664	0	0
AO090009000401	8.63755	0.842573	9.19306	0	22.6304
AO090009000402	59.3068	298.641	189.655	2.80064	144.6
AO090009000405	6047.01	7242.79	5351.94	4090.32	3979.48
AO090009000406	1.51187	10.6855	0	0	10.7709
AO090009000407	17.7456	85.5298	0.67983	0	48.7546
AO090009000410	0	37.3002	0	12.1377	0
AO090009000411	0	0	0	0	0
AO090009000412	4270.15	3982.28	3499.75	2606.05	2294.86
AO090009000413	34.5568	37.5979	0.347608	7.29251	0
AO090009000414	0	0	0	0	0
AO090009000415	51.5685	13.341	48.1657	116.7	0
AO090009000416	0	0	0	0	0
AO090009000417	0	0	0	89.8832	51.6601
AO090009000418	0	0	0	0	0
AO090009000419	18.4276	14.5802	27.5211	0	60.0328
AO090009000420	0	46.1118	0.660869	94.7851	35.9679
AO090009000421	0	122.522	0	247.165	58.8543
AO090009000422	0	39.2947	16.3525	0	94.8603
AO090009000423	2.02875	0.0125655	0.0684332	0	0
AO090009000424	388.875	520.811	339.94	44.3559	155.028
AO090009000425	37.4785	0	0	41.1201	0
AO090009000426	26.7767	141.245	43.1963	88.8484	0
AO090009000427	0	0	0	0	0
AO090009000428	10.3081	0	0	0	78.0441
AO090009000429	15.1073	0	0	0	31.1937
AO090009000430	40.2845	0	0	0.286179	38.0044
AO090009000431	27.9156	0	0	0.36895	0
AO090009000432	0.119654	0.0722575	0.262349	47.6689	0
AO090009000433	0	0.96449	0	0	0
AO090009000434	71.34	77.6068	53.6205	0	0
AO090009000436	110.88	114.015	80.9921	87.7838	0
AO090009000437	68.99	226.471	38.4191	122.395	129.542
AO090009000439	0	0	0	0	0
AO090009000440	0	0	0	0	0
AO090009000441	0	0	0	0	0.0663668
AO090009000442	70.7245	0	58.0157	29.7962	19.5511
AO090009000443	0	0	5.50019	0	0
AO090009000445	40.5524	96.9359	31.9412	176.356	130.242
AO090009000446	17.9342	0	0	6.79483	1.97286
AO090009000447	10.4848	11.6406	59.4667	22.3123	78.8257
AO090009000449	10.0617	15.8347	25.5371	38.4679	0
AO090009000450	0	45.704	43.9384	19.734	0
AO090009000453	7.13801	0	0	0	0
AO090009000454	0	0	0	0	0
AO090009000455	0	0	0	0	64.6749
AO090009000456	0	0.63229	29.9335	0.0217699	22.7803
AO090009000457	131.774	68.0523	369.043	335.613	1129.83
AO090009000459	820.224	644.073	887.149	779.805	1202.27
AO090009000460	52.4695	0.106061	51.5236	0	0.56305
AO090009000462	21.6254	35.8381	67.6352	3.9341	26.9916
AO090009000463	44.2424	47.1206	396.502	348.374	240.896
AO090009000464	0.137902	28.3837	0	0	95.9169
AO090009000465	0	0	0	0	0
AO090009000467	0.677989	19.8709	40.4931	0	0
AO090009000468	0	0	0	5.02675	4.45525
AO090009000469	0	0	0	0	0
AO090009000470	0	0	0	0	0
AO090009000471	6.73153	0	12.9276	34.568	0
AO090009000472	41.8878	43.9127	161.756	89.9316	0
AO090009000473	926.568	295.1	520.93	78.0478	454.916
AO090009000474	70.1679	29.5223	170.256	4.59061	36.4777
AO090009000475	119.703	101.209	90.4579	78.4252	101.632
AO090009000476	0	0	0	0	0
AO090009000477	48.4467	0	0.897653	36.6636	0
AO090009000478	31.6056	34.7189	17.9385	1.15785	2.52093
AO090009000479	68.4334	86.9141	0	71.0471	194.652
AO090009000480	0	133.675	0	0	0
AO090009000481	24.0945	0.520548	7.3273	30.5801	0
AO090009000482	0	0	0	0	0
AO090009000483	0	0	54.5008	0	0
AO090009000484	43.7961	0	0	89.1941	137.054
AO090009000485	4017.06	4008.46	3355.07	3216.3	1325.58
AO090009000486	36.7234	2.38506	0	0	0
AO090009000487	60.8526	91.7265	57.4657	95.6243	82.5547
AO090009000488	6.20603	81.295	82.3253	13.9562	175.616
AO090009000492	263.328	173.292	536.698	234.97	283.333
AO090009000493	11.0469	39.2177	0	228.05	509.301
AO090009000495	118.166	25.1839	130.825	296.985	324.175
AO090009000496	0	0	23.7037	26.5183	0
AO090009000499	0	0	0	0	0
AO090009000500	1.41023	4.66149	0	92.7578	111.36
AO090009000502	22.6311	44.39	2.09554	33.0978	162.564
AO090009000504	0	0	0	0	0
AO090009000505	0	0	0	0	0
AO090009000506	39.7521	31.648	138.671	12.4744	0
AO090009000507	0	37.6005	0	9.49773	0
AO090009000508	0	0	0	0	0
AO090009000509	0	0	0	0	0
AO090009000510	0	0	0	0	0
AO090009000511	0	0	0	0	0
AO090009000513	0	0	0	0	0
AO090009000515	25.9603	39.7842	91.5374	175.902	292.032
AO090009000516	0	23.5678	2.48633	0	0.078689
AO090009000517	0.682571	18.4114	0	0	0
AO090009000519	0	0	25.6118	0	0
AO090009000520	8.46016	28.5441	0	68.2468	27.4151
AO090009000521	0	0	0	0.198379	0
AO090009000522	0	0	0	100.068	0
AO090009000523	0	0	0	0	0
AO090009000524	0	0	0	0	0
AO090009000526	0	0.0223926	0	0	0
AO090009000527	0	0	0	0	0
AO090009000528	0	0	0	0	0
AO090009000529	0	3.59233	0	0	0
AO090009000530	0	0	0.0386796	0	0
AO090009000531	0	0	0	0	0
AO090009000532	0	0	0	0	0
AO090009000533	0	0	0	0	0
AO090009000535	0	0	0	0	0
AO090009000536	0	0	0	0	0
AO090009000537	0	0	0	0	0
AO090009000538	0.0831981	0	0	0	0
AO090009000539	0	0	0	0	0
AO090009000720	0	0	0	0	83.525
AO090009000544	0	0	0	0	40.4919
AO090009t00013	0	0	0	0	0
AO090009000545	0	0	0	0	0
AO090009000547	0	0	0	0	0
AO090009000548	0	0	0	5.95311	0
AO090009000551	0	0	0	0	0
AO090009000552	14.8857	42.0679	51.6094	20.8368	0.901149
AO090009000553	87.1321	24.808	0	31.9383	61.3721
AO090009000554	0.415399	0	41.1676	47.7154	38.3849
AO090009000555	0	0	0	0	0
AO090009000556	0	0	0	0	0
AO090009000557	141.63	70.5493	70.2305	39.8536	110.035
AO090009000558	56.9824	0	0	29.0023	168.472
AO090009000559	63.0072	79.7025	0	306.427	0
AO090009000560	0	16.0563	56.9798	0	0
AO090009000561	0	0	47.856	0	0
AO090009000562	100.309	2.20524	128.24	0	74.9173
AO090009000563	77.9259	76.0394	0	0	85.5892
AO090009000564	0	0	0	0	0
AO090009000565	0.0202253	0	0	0	0
AO090009000566	32.0357	0	0	94.6873	40.5739
AO090009000567	38.8725	160.677	116.02	168.242	163.513
AO090009000568	21.546	387.245	292.894	77.6359	52.7371
AO090009000569	6.50747	8.49854	0	0	0
AO090009000570	0	0	0	0	0
AO090009000571	2.04038	0	0	0	0
AO090009000572	0	0	0	0	0
AO090009000573	0	0	0	0	0
AO090009000575	0	0	0	0	0
AO090009000576	0	0	0	0	0
AO090009000577	0	0	0	4.91223	0
AO090009000579	46.4494	144.213	59.3029	0.0497134	110.351
AO090009000580	0	0	0	0	0
AO090009000581	0	0	0	0	0
AO090009000582	0	0	0	0	0
AO090009000584	0	0	0	0	0
AO090009000585	0	0	0	0	0
AO090009000588	0	0	0	0	0
AO090009000589	0	0	54.1991	179.118	149.09
AO090009000590	0.0212122	13.305	0	71.8006	97.2
AO090009000591	25.0031	24.0562	26.1358	12.5795	1.32917
AO090009000592	16.9672	25.3785	0	0	0
AO090009000593	0	0	0	0.0624525	5.87162
AO090009000594	70.5126	22.8054	0	81.1177	231.357
AO090009000595	42.4686	68.4987	0.0889632	61.8376	87.6949
AO090009000596	82.0105	51.586	138.827	95.2895	0
AO090009000597	6.58329	0.0327206	30.2584	0.0461898	0.0868529
AO090009000598	67.7055	68.9617	101.67	24.7756	19.1331
AO090009000600	0	0	0	0	0
AO090009000601	0	0	0	0	0
AO090009000602	0	0	0	0	0
AO090009000603	0	0	0	0	0
AO090009000604	0	0	0	0	0
AO090009000605	0	0	0	0	0
AO090009000606	0	1.79499	0	25.8543	0
AO090009000607	0.162945	32.294	0	0	0
AO090009000608	19.8004	12.8017	38.9257	57.0387	0
AO090009000609	190.657	324.262	174.708	10.4156	188.395
AO090009000610	14.1745	27.6166	94.3372	103.133	20.3399
AO090009000612	0	0	0	0	0
AO090009000613	11.3179	21.9045	0	0	14.3138
AO090009000615	0	26.8849	82.328	91.517	61.5617
AO090009000617	164.396	278.902	355.241	493.688	487.073
AO090009000618	13.9481	11.2307	0	0.280598	134.543
AO090009000619	0	41.6148	0	0	0.0473677
AO090009000621	0	0	48.646	0	0
AO090009000622	101.847	80.5263	135.805	43.0818	157.323
AO090009000623	45.0255	56.2339	32.6379	0.827074	9.2835
AO090009000624	12.9608	0	0	0	0
AO090009000626	315.136	342.541	309.214	139.387	117.897
AO090009000627	47.3716	68.686	0	94.6995	0
AO090009000628	0	0	0	0	0
AO090009000629	67.2282	96.8581	288.832	58.8709	139.367
AO090009000630	167.05	116.895	117.412	393.764	431.463
AO090009000631	13.2005	62.0583	30.9603	32.196	70.4886
AO090009000632	0	0	0	0	0
AO090009000634	159.048	179.755	333.113	8194.37	9303.04
AO090009000635	0	0	50.2282	0	0.456048
AO090009000636	0	0	78.2185	0	26.9056
AO090009000637	0	0	77.184	24.8632	0
AO090009000638	26.9026	76.9632	92.0579	54.8319	205.223
AO090009000640	24.0969	77.6096	135.787	45.0736	0
AO090009000641	47.1839	58.5381	48.4191	89.3844	0
AO090009000643	86.5818	78.8184	101.058	66.0824	23.0453
AO090009000644	393.366	951.116	652.252	525.384	175.914
AO090009000645	0	0	0	0	0
AO090009000646	10.8317	1.3458	36.5518	50.2334	51.6818
AO090009000647	1.70237	0	0	0	0
AO090009000648	0	48.5211	0	46.1858	0
AO090009000649	25.4891	19.8782	22.3106	39.7862	79.0929
AO090009000650	42.9842	21.593	0	0	0
AO090009000651	0.160129	3.52416	8.64465	0	67.0973
AO090009000653	419.29	463.379	459.477	505.898	931.838
AO090009000654	29.3792	20.5196	102.231	0.488001	0
AO090009000655	424.605	409.042	356.239	4.92163	230.798
AO090009000658	17.8588	21.4025	0	0.0235485	0
AO090009000659	341.173	303.642	93.0293	361.7	73.4176
AO090009000660	0	5.70605	21.1725	4.21923	0
AO090009000661	0	0	0	0	0
AO090009000663	60.5614	9.51921	63.5269	27.7424	0
AO090009000664	0	0	0	0	0
AO090009000665	0	0	0	0	0
AO090009000667	138.87	163.43	247.785	30.6782	266.951
AO090009000668	293.074	289.114	145.661	109.608	408.789
AO090009000669	58.3179	42.4943	51.6696	1.066	0.0911113
AO090009000670	0	0	0	0	0
AO090009000671	2.05312	1.28577	62.6889	0	0
AO090009000672	42.8133	205.132	270.539	201.463	278.379
AO090009000673	166.462	313.663	420.903	88.556	14.3344
AO090009000674	20.596	64.8329	104.72	100.602	77.0804
AO090009000675	2.1748	29.9079	99.6364	0.0784744	0
AO090009000676	100.567	23.6806	23.4196	67.8629	0
AO090009000677	3.9169	28.692	41.9096	47.3873	54.5571
AO090009000678	7.1586	18.2627	0	0	110.158
AO090009000679	52.8313	83.0214	0	0.0475829	136.043
AO090009000680	31.3232	0	14.9159	0	0
AO090009000681	158.268	115.776	8.20238	36.4672	97.1111
AO090009000682	139.062	36.4613	83.8726	202.385	294.02
AO090009000684	225.772	80.747	63.0024	51.7953	73.4142
AO090009000685	72.9816	9.69244	94.2989	56.8261	0
AO090009000686	65.5198	49.9719	42.4168	78.8417	95.0468
AO090009000687	62.1288	31.5115	143.207	73.6957	71.5565
AO090009000688	120.034	196.949	212.083	140.331	61.7139
AO090009t00014	0	0	0	0	0
AO090009000689	29.664	76.2737	65.6294	86.8771	117.853
AO090009000690	51.9673	0.0942412	172.195	0	94.8075
AO090009000691	546.815	927.429	610.574	677.541	116.859
AO090009000692	3.19081	2.65628	46.1976	0	82.9331
AO090009000693	0	50.1538	0.0749366	68.6627	0
AO090009000695	275.578	479.394	255.314	228.708	423.332
AO090009000696	0	0.797585	6.22603	45.8806	42.2095
AO090009000697	0	0	38.4613	47.6109	3.15229
AO090009000698	4576.45	3520.49	3428.39	2610.96	1276.05
AO090009000700	110.941	69.8254	10.996	55.3841	45.7775
AO090009000701	0.063859	25.9919	116.436	0.072584	0
AO090009000702	35.1695	2.34643	294.58	100.867	264.916
AO090009000703	0	0	44.9068	0.504829	0
AO090009000705	131.487	72.3411	120.704	15.383	81.5475
AO090009000707	9.6791	11.8237	16.6999	8.82523	79.1541
AO090009000708	437.697	508.767	339.723	527.315	790.539
AO090009000709	30.4441	13.8639	31.442	9.90836	5.10223
AO090009000710	0.123178	42.5816	9.3626	14.4208	0
AO090009000711	229.174	139.337	173.142	362.524	151.899
AO090009000712	188.477	268.744	375.566	249.799	335.749
AO090009000713	264.842	184.924	194.597	176.295	0
AO090009000714	123.029	102.993	85.9681	28.3673	46.5032
AO090009000715	4316.29	4561.18	3580.92	3391.67	2039.31
AO090005001652	176.938	74.6882	25.7585	72.5143	46.7243
AO090005001651	0.0905279	0	0	0	1.7897
AO090005001650	24.4952	36.3913	45.4565	9.93636	65.4644
AO090005001649	86.4773	126.836	35.5611	134.592	165.172
AO090005001648	71.5613	0	0	48.4383	55.9433
AO090005001647	0	0	0	0	0
AO090005001646	257.197	149.343	231.365	79.4012	293.032
AO090005001645	132.989	41.715	55.7031	10.8411	60.6916
AO090005001643	181.359	137.644	64.4136	84.4631	59.1658
AO090005001642	145.929	241.967	62.0184	0	59.1331
AO090005001641	176.275	116.285	81.6532	42.1667	7.64018
AO090005001640	0	70.4844	0	0	0
AO090005001639	0	43.1278	39.0562	0	0.603117
AO090005001637	4.65558	2.27187	7.44435	0.347433	0.703547
AO090005001636	0.588159	59.6028	93.3405	0	0
AO090005001634	0	0	0	0	0
AO090005001633	47.1003	45.5189	64.3858	19.0516	105.031
AO090005001632	157.073	23.4331	59.405	113.314	103.373
AO090005001631	0	76.5705	14.2157	61.7659	241.691
AO090005001630	166.856	123.199	35.6213	128.515	207.273
AO090005001628	59.1945	31.8952	11.2175	64.1473	151.492
AO090005001627	48.9532	214.561	73.2645	59.0353	0
AO090005001626	0	10.9084	0	0	0
AO090005001625	44.1774	25.6366	32.0428	0	34.45
AO090005001624	97.7266	35.9535	166.05	198.618	183.177
AO090005001623	0	0	0	0	0
AO090005001622	4.45636	0	0	1309.79	1308.7
AO090005001621	0.465648	19.9807	0.884832	0	0
AO090005001620	248.637	319.808	282.185	475.404	338.768
AO090005001619	96.4732	0.388094	35.2159	38.4759	80.1137
AO090005001618	0	0	0	0	0
AO090005001616	0	82.9017	135.897	135.235	94.407
AO090005001615	2.66964	5.64255	45.6853	124.865	0.427927
AO090005001614	0.322287	0	0	0.18316	0
AO090005001613	117.748	78.4034	172.734	52.1063	133.268
AO090005001612	110.582	134.496	0	80.0454	82.7891
AO090005001611	91.0218	189.215	106.932	71.1624	15.3132
AO090005001610	31.0535	0	0	120.261	0
AO090005001609	111.019	42.2562	167.617	97.5778	36.0866
AO090005001608	39.5088	1.96214	38.6972	196.011	144.613
AO090005001607	0	0	0	39.0931	62.1361
AO090005001606	2.21079	33.9721	11.6608	12.5642	15.14
AO090005001605	0.727097	27.4095	44	23.2906	0
AO090005001603	130.293	92.9996	103.516	8.76957	159.738
AO090005001602	0	0	0.0681643	0	0
AO090005001601	7825.6	5410.34	5050.22	5045.39	3740.31
AO090005001600	32.7554	25.5556	0	41.5316	0
AO090005001599	10.5151	0	29.3964	2.11514	11.7639
AO090005001598	0	0.268743	6.86269	0	0
AO090005001597	12.7545	8.52909	4.36065	7.37145	0.0866304
AO090005001596	0	0	0.0393152	0	0
AO090005001595	167.665	109.135	120.933	261.655	208.357
AO090005001594	173.601	147.686	129.836	48.2443	0.0816526
AO090005001593	46.6703	26.1573	80.3185	48.1662	13.3898
AO090005001592	36.0977	47.7348	110.227	0.470622	0
AO090005001591	56.36	1.18405	0.0560738	45.202	0.47827
AO090005001590	682.603	427.721	352.811	79.1108	164.512
AO090005001589	67.0655	161.614	101.251	0.998232	342.301
AO090005001587	25.4732	164.395	266.733	17.6939	282.525
AO090005001586	50.4902	224.666	50.2955	0	0
AO090005001585	6.8916	6.26437	51.1747	61.219	10.8031
AO090005001584	35.3925	4.55479	1.37085	22.1657	135.378
AO090005001583	35.07	0	0.0625147	10.2085	253.882
AO090005001582	120.156	0.0608473	104.219	6.82862	0
AO090005001581	0	0	0	0	0
AO090005001580	212.144	272.917	52.9728	197.127	148.342
AO090005001579	74.5802	73.4108	109.525	0.893361	171.996
AO090005001578	0	0	0	2.10443	0
AO090005001576	18.7083	30.4022	9.61826	0	26.3184
AO090005001575	42.9009	51.3175	35.6536	0	60.8336
AO090005001574	45.2659	0	0	0	0
AO090005001573	13.1801	35.5384	2.35467	0.0462373	2.60827
AO090005001572	204.973	497.642	4.72397	400.018	360.529
AO090005001571	0.0851225	8.49885	158.193	0.0483763	0
AO090005001570	0.142647	19.9659	0	1.56732	44.5368
AO090005001569	7.79404	0	0	84.2046	81.2702
AO090005001568	124.838	174.382	67.7096	166.385	209.113
AO090005001567	27.6236	26.6781	85.7996	227.873	220.087
AO090005001566	0	0	0	0	0
AO090005001565	218.098	329.252	413.768	120.522	0.0785793
AO090005001564	0	0	0.110672	60.576	1.0788
AO090005001563	0	0	110.192	54.3913	0
AO090005001561	607.389	853.461	882.041	333.669	357.55
AO090005001560	0	15.5162	0	0.0799392	0
AO090005001559	7.37228	0	0	0	0
AO090005001558	0	0	6.91504	83.3774	78.5149
AO090005001557	429.982	535.346	449.874	143.486	100.279
AO090005001556	857.483	651.52	1454.03	4706.76	4716.11
AO090005001555	14.3241	5.89354	0	6.89863	0
AO090005001554	238.632	204.112	217.095	117.093	16.8886
AO090005001553	18.0826	0	17.9365	0	0
AO090005001552	0	0	0	0	0
AO090005001551	0	0	0	0	0
AO090005001550	9.50998	0	0	0	0
AO090005001549	14.5711	0	18.7539	0	0
AO090005001548	107.176	223.946	7.86455	169.998	161.944
AO090005001668	51.6151	67.9256	68.4938	31.2179	40.9853
AO090005001545	0.223886	0	45.8878	0	0
AO090005001544	0	19.5592	0	52.8546	0
AO090005001543	11.2654	0.0132806	33.5601	0.0749899	0
AO090005001541	608.3	429.633	318.546	268.927	244.019
AO090005001540	0	3.55891	0.0824777	48.3151	85.1208
AO090005001538	49.4648	45.6853	39.3086	819.752	1366.99
AO090005001535	0.118534	22.8105	0	55.9799	0
AO090005001534	0	0	0	61.2111	0
AO090005001533	109.837	9.71144	92.4512	0	0
AO090005001532	24.1002	39.583	21.7125	0.689131	0
AO090005001531	35.9712	0	0.0223267	9.75127	36.8892
AO090005001530	5.62818	0	0.0636909	27.6522	45.9425
AO090005001529	0	67.3094	0	2.57744	0
AO090005001528	23.8752	91.8971	174.98	226.67	136.732
AO090005001527	0	0	0.545607	0	0
AO090005001526	0	0	0	0	0
AO090005001525	0.303147	24.5553	0	0.620218	65.6973
AO090005001524	0	0.252305	45.4822	15.4932	0
AO090005001523	0	0	1.45299	36.1781	76.0747
AO090005001522	48.034	107.434	129.542	42.8707	0
AO090005001521	0	0	0	0	0
AO090005001519	19.7976	166.042	0	71.3278	0
AO090005001518	31.4928	52.2823	130.019	69.3295	69.9894
AO090005001517	28.2676	0	0	0	2.7734
AO090005001516	26.8127	0	43.5139	0	51.4215
AO090005001515	289.888	334.192	339.802	94.6314	176.149
AO090005001514	0.835254	0	52.9758	97.7424	1.01429
AO090005001512	0	0	0.0372671	0	0
AO090005001510	22.6164	98.1043	8.15442	142.365	0
AO090005001509	190.237	344.335	1127.03	529.761	1623.31
AO090005001508	0	0	0	0	0
AO090005001507	158.771	75.2634	0.178292	38.4959	76.6871
AO090005001506	35.368	32.0875	0	0.0943669	0
AO090005001504	34.936	72.4107	39.0937	25.9662	0
AO090005001503	59.3737	63.1104	62.8536	0	99.0857
AO090005001502	146.912	173.799	260.852	193.486	187.104
AO090005001501	0	0	0	0	0
AO090005001500	0.512942	20.6893	0	0.528367	0
AO090005001498	0	20.5805	0	0	0
AO090005001497	2.30373	74.6447	0	0	0
AO090005001496	0	0	0	0	0
AO090005001495	0	0	0.209515	0	0
AO090005001494	0	0	0	0	60.2301
AO090005001667	28.7815	35.539	98.1835	0.0633173	7.56021
AO090005001491	198.552	86.4048	153.234	80.567	222.075
AO090005001490	90.7013	11.8207	628.091	267.482	123.643
AO090005001489	154.646	84.7919	143.119	35.0018	66.7763
AO090005001488	81.6243	38.5153	36.8298	15.6472	40.864
AO090005001486	401.126	284.755	569.437	194.316	127.07
AO090005001484	432.801	299.271	1600.3	408.834	613.486
AO090005001483	33.0598	20.1988	59.0793	10.0058	40.3339
AO090005001482	8.66981	0	5.96961	33.9961	11.3354
AO090005001481	0	0	0	0	0
AO090005001480	75.8503	62.9818	155.413	155.346	2.22903
AO090005001479	8.92206	40.6588	38.9613	18.4511	0
AO090005001478	77.0331	50.3305	131.213	63.1368	0
AO090005001477	17.7243	129.355	170.556	0	69.5503
AO090005001476	0	0	0	0	0
AO090005001475	1.83587	15.6293	0.510519	33.6671	137.306
AO090005001473	0	7.83321	0.295912	0	0
AO090005001472	43.5208	50.9525	0	0	0
AO090005001471	355.777	420.751	509.746	492.57	84.1405
AO090005001470	0	0	0	0	0
AO090005001469	0	0	0	0	0
AO090005001468	0	0	0	104.162	0
AO090005001467	315.049	599.914	1676.67	66.819	505.554
AO090005001466	58.9119	71.9296	96.7865	49.8428	8.16168
AO090005001464	147.812	139.705	58.2351	0	178.256
AO090005001463	0	20.6246	0	0	0
AO090005001462	0.405751	0	0	0	0
AO090005001461	1634.2	2067.98	1533.23	1719.74	1125.78
AO090005001460	80.0681	74.8876	32.8571	1.17859	83.395
AO090005001459	32.2415	166.877	0	0	58.7107
AO090005001458	0	0	0	0	0
AO090005001457	0.141162	38.7585	0	0	0
AO090005001456	0	32.7201	20.2771	56.1862	0
AO090005001455	97.6626	73.5809	199.254	194.135	93.7715
AO090005001454	0	0	0	0	0
AO090005001453	152.786	540.953	183.587	0	0
AO090005001452	38.0365	45.0718	11.4602	33.1699	120.032
AO090005001451	38.1466	6.38737	0	133.212	0
AO090005001450	281.277	258.175	358.665	678.823	390.984
AO090005001449	0	0	52.1925	0.178318	55.7156
AO090005001448	0	2.93601	12.3921	0.030475	1.43259
AO090005001447	58.1418	12.4059	135.001	124.186	0
AO090005001445	116.268	35.4562	0	0	180.041
AO090005001444	68.8437	41.8365	0	118.487	84.8128
AO090005001443	0	0	116.817	28.3995	221.987
AO090005001442	101.737	35.7557	0	414.732	325.717
AO090005001441	48.9688	0	52.8074	0	21.1999
AO090005001666	0	77.1954	0	0	84.9012
AO090005001438	10.2966	74.7613	74.1441	109.437	138.795
AO090005001671	855.296	510.191	1139.26	900.887	909.207
AO090005001435	45.1731	46.601	106.656	0	103.1
AO090005001434	45.5006	56.4857	115.062	0	0
AO090005001431	190.833	207.698	99.9979	117.006	62.4515
AO090005001430	0.0486003	0.821774	0	439.218	32.6675
AO090005001429	12.1077	22.7292	0.177471	34.9223	92.5163
AO090005001427	311.704	354.59	283.223	541.919	789.267
AO090005001426	0.0330637	18.7421	52.3117	0	0
AO090005001425	6.99825	7.5706	79.1104	42.8977	86.1174
AO090005001424	12.0622	28.7519	56.0752	6.23194	43.9583
AO090005001423	0	0	0	47.9068	67.7065
AO090005001422	41.1762	3.99304	130.348	52.0117	282.721
AO090005001421	0	0	0	0	0
AO090005001420	11.2852	3.41378	7.60078	13.8901	4.06433
AO090005001419	1005.91	391.035	513.748	949.903	622.685
AO090005001418	0	0	0	0	0
AO090005001417	0	0	0	0	0
AO090005001416	0	0	0	0	0
AO090005001415	0	0	0	0	0
AO090005001414	0	0	0	22.965	21.5911
AO090005001413	182.258	138.291	264.401	40.457	461.939
AO090005001412	888.966	520.655	634.182	295.623	528.765
AO090005001411	0	0	0	0	0
AO090005001410	0	0	0	0	0
AO090005001409	0	0	0	0	0
AO090005001408	175.586	152.529	140.197	111.937	45.9034
AO090005001407	816.314	1000.08	527.404	472.561	790.847
AO090005001406	338.851	184.461	424.89	382.364	175.383
AO090005001405	44.485	80.9555	93.5725	3.47163	95.8529
AO090005001404	246.711	242.224	300.867	644.009	244.993
AO090005001403	0	0	0	0	0
AO090005001402	0	0	0	0	0
AO090005001401	0	0	0	0	0
AO090005001400	0	0	0	0	0
AO090005001399	0	0	0	46.9037	0
AO090005001398	0	0	0	57.1389	0
AO090005001397	0	0	0	0	37.146
AO090005001396	0	45.9085	74.2916	10.8011	65.1132
AO090005001395	0	16.5272	0	183.335	0
AO090005001394	12.5048	34.9199	0	0	0
AO090005001393	48.8817	105.325	138.18	91.201	150.711
AO090005001392	0	0.378364	27.2517	8.8129	0
AO090005001391	1139.97	988.455	1557.94	680.389	650.781
AO090005001390	35.0317	28.8366	7.56126	70.0846	4.99533
AO090005001389	10.9544	44.0791	244.244	0.630436	39.1491
AO090005001388	4.75718	6.37925	4.3893	0.0201009	0
AO090005001387	31.5538	0	0	0	0
AO090005001386	0	0	0	0	0
AO090005001385	0	0.99456	0	0	0
AO090005001384	7.62029	0	27.6807	0	0
AO090005001383	48.1835	0	0	0	0
AO090005001382	33.1678	26.7061	0	32.7743	0
AO090005001381	10.3202	302.551	78.8194	29.7328	93.5119
AO090005001380	0	16.0729	0	0	0.0430944
AO090005001379	0	0	0	0	0
AO090005001378	0	0	0	0	0
AO090005001377	0	0	0	0	0
AO090005001376	0	0	0	0	0
AO090005001374	1.14217	0	106.971	58.2235	83.4417
AO090005t00026	0	0	0	0	0
AO090005001373	0	0	0	0	0
AO090005t00025	0	0	0	0	0
AO090005001372	22.6807	0	0	0	0
AO090005001371	0	0	0	0	0
AO090005001370	0	0	0	0	0
AO090005001369	0	0	0	0	0
AO090005001368	0	0	0	0	0
AO090005001366	0	0	0	0	0
AO090005001365	0	0	0	0	0
AO090005001364	75.1899	5.14405	38.8293	61.3932	0
AO090005001363	0.984312	59.9075	0	6.38373	42.4149
AO090005001362	172.61	108.214	201.786	397.378	315.068
AO090005001361	479.306	584.621	348.909	240.615	245.06
AO090005001360	0	0	72.3359	0	0
AO090005001359	0	0	0	0.0523772	0
AO090005001358	0	0	0	0	0
AO090005001357	17.4753	27.8826	39.1854	63.8844	106.863
AO090005001356	9.5201	21.9212	1.68005	0	126.61
AO090005001355	65.6615	3.03913	69.6411	151.937	2.81584
AO090005001354	122.6	71.2536	38.4901	20.7535	67.159
AO090005001352	0	41.465	0	50.7197	0
AO090005001351	0.0516795	9.90352	0.271945	2.34962	0
AO090005001350	0	0	0	0	0
AO090005001349	0	0	0	0	0
AO090005001348	0	0	0	0	0
AO090005001347	0	0	0	0	42.7669
AO090005001346	18.9214	0	40.7893	290.719	188.61
AO090005001345	0	2.06286	41.2744	0	0
AO090005001344	0	0	0	0	0
AO090005001343	0	0	0	0	0
AO090005001342	0	0	0.0710248	43.447	0
AO090005001341	18.5435	52.6122	77.2978	23.3264	81.34
AO090005001340	0.138858	7.91587	0	60.7646	0
AO090005001339	0	0	0	0	0
AO090005001338	0	2.12522	0	33.6982	0
AO090005001337	0	36.2256	0	29.5364	0.414467
AO090005001336	0	0	0	0	0
AO090005001334	0	0	0	0	0
AO090005001333	0	0	0	0	0
AO090005001332	0	0	0	0	0
AO090005001331	0	0	0	0.254764	0
AO090005001330	0	0	0	0	0
AO090005001328	0	0	0	0	0
AO090005001327	0	0	0	0	0
AO090005001326	0	0	0	0	0
AO090005001325	0	0	0	0	0
AO090005t00024	0	0	0	0	0
AO090005001322	0	0	0	0	0
AO090005001321	0	0	0.0731975	0	0
AO090005001320	0	0	0	46.3888	0
AO090005001319	0	0	0	0	0
AO090005001318	0.319467	64.9075	0	0	0
AO090005001317	35.847	0.20765	0	59.3291	0
AO090005001316	41.2867	39.7474	0	27.0737	70.0167
AO090005001315	53.8151	12.3042	46.3728	179.112	264.627
AO090005t00023	0	0	0	0	0
AO090005001314	0	0	0.0836543	0	0
AO090005001313	0	0	0	0	0
AO090005001312	0.0469842	10.8196	59.749	343.919	275.043
AO090005001311	132.313	253.56	324.357	187.805	192.452
AO090005001309	53.4853	0	0	0	0
AO090005001308	24.6964	0	0	0	0
AO090005001307	0	0	0	0	0
AO090005001305	404.488	138.585	109.713	315.322	243.232
AO090005001304	57.7035	71.6181	114.482	144.233	121.549
AO090005001302	378.842	420.361	791.719	929.722	589.6
AO090005001301	30.7537	0.684042	6.50698	49.4399	0
AO090005001300	232.473	226.121	156.982	4441.77	2348.83
AO090005001299	74.5164	60.6734	0	11.182	86.7881
AO090005001298	0.293586	52.3013	0	13.1394	0.862768
AO090005001297	15.0238	2.9635	43.8326	0	7.95221
AO090005001296	12.6662	0	46.7572	0	170.373
AO090005t00022	0	0	0	0	0
AO090005001295	0	0	52.3303	54.6305	7.80127
AO090005001293	0	116.398	0	33.3028	36.0224
AO090005001292	13.4232	16.2858	1.98547	0	19.7938
AO090005001291	359.916	582.792	648.508	314.009	417.357
AO090005001290	254.613	553.841	330.096	339.513	96.6929
AO090005001289	9.07035	0	0	0	0
AO090005001288	4.78832	0.700995	26.2694	0.0235608	27.1131
AO090005001287	0	0	0	0	0
AO090005t00021	0	0	0	0	0
AO090005001286	41.0462	38.3061	49.6778	0.266596	88.4363
AO090005t00020	0	0	0	0	0
AO090005001284	8.8926	0	10.5701	53.759	45.217
AO090005001282	19.4666	0	45.6918	52.6955	7.06191
AO090005001281	0	0	0	38.1976	18.9571
AO090005001280	98.8033	143.79	148.219	795.067	769.515
AO090005001279	25.7318	0	52.111	37.1066	65.9245
AO090005001278	12.3719	0	28.0791	0	60.3874
AO090005001277	0	10.0114	107.327	4.18539	0
AO090005001276	23.9433	11.7742	53.5012	93.9042	84.6372
AO090005001275	58.293	46.7783	99.6063	98.3441	106.039
AO090005001274	0.125989	0	0	0	0
AO090005001273	43.9516	36.6041	6.37848	58.6997	7.92878
AO090005001272	140.028	115.223	53.0169	0	2.67644
AO090005001271	32.332	59.4317	202.226	34.419	94.439
AO090005001270	0	0	0	0.0828863	0
AO090005001269	0	0	0	0	0.803656
AO090005001268	0	0	0	0.232381	0
AO090005001266	40.9458	5.62718	89.1595	39.7894	0
AO090005001264	13.7704	10.8997	16.1708	0	28.932
AO090005001262	0	0.146453	0.0797601	0	0
AO090005001261	15.1349	9.20236	0	0	148.913
AO090005001259	0	0.0785537	0	3.69633	0
AO090005001258	60.5431	73.3612	53.618	25.9787	60.8276
AO090005001257	0.082504	0	0	0.281329	0
AO090005001256	0	0	0	20.355	0.0914562
AO090005001254	0	0	0	0	20.5507
AO090005001253	96.9905	28.0834	109.786	183.447	122.844
AO090005001250	0.0525374	14.9186	39.0268	31.291	0.0374286
AO090005001249	101.005	127.695	147.117	68.3282	95.6851
AO090005001248	24.0235	218.575	114.489	134.067	20.2363
AO090005001247	8.41309	15.5167	0	19.3158	29.3279
AO090005001245	0.339415	0	0.562274	0	0
AO090005001244	0	10.4745	0	0	89.7287
AO090005001243	0	0	0	0	0
AO090005001242	9.22273	79.9921	0	0	0
AO090005001241	64.2757	132.265	97.358	83.6133	64.5962
AO090005001240	49.8564	43.1329	48.7326	0.070924	83.251
AO090005001239	168.261	117.02	55.1413	313.191	326.538
AO090005001238	57.6956	39.4814	12.7688	40.6101	0
AO090005001236	0.70258	0	0	0	0.0577536
AO090005001234	6.6637	0	71.398	0	96.5198
AO090005001233	16.621	23.6471	9.3955	9.87785	9.47027
AO090005001232	19.5707	27.5389	0	0	0
AO090005001231	42.1925	112.258	104.703	59.234	76.4231
AO090005001230	77.9154	156.975	202.386	356.566	247.139
AO090005t00019	0	0	0	0	0
AO090005001229	206.177	44.0996	0	59.3393	165.085
AO090005001228	0	0	0	0	0
AO090005001226	16.8938	0.214777	0	38.7071	21.8538
AO090005001225	5498.49	4840.58	3666.76	3380.71	1832.07
AO090005001224	22.2175	56.2489	59.0522	6.51572	6.95653
AO090005001223	55.6251	38.6214	0	61.3807	91.6261
AO090005001222	0	91.0363	58.2256	79.9776	0
AO090005001221	45.6134	0	0	0	0
AO090005001220	36.5986	0	0	0	0
AO090005001219	0	0	0	0	0
AO090005001217	0.369208	41.2922	55.1439	0.587514	0
AO090005001216	0	0	0	0	0
AO090005001215	0	0	0.0385079	0	0
AO090005001214	4.42381	3.6981	3.60795	0	0
AO090005001213	0	0	0.0461378	0	0
AO090005001212	0	18.3806	0.0332016	240.406	453.219
AO090005001211	32.8672	0	29.6444	44.3845	115.159
AO090005001210	8.11258	8.7022	8.12455	2.84789	48.2819
AO090005001209	0	0	0	14.5332	0
AO090005001207	86.8669	144.102	227.394	723.57	661.636
AO090005001206	64.5099	112.804	5.69536	76.2546	75.7747
AO090005t00018	0	0	0	0	0
AO090005001204	21.3785	32.9927	8.27181	5.24105	20.8299
AO090005001203	31.7537	26.8869	150.605	99.0337	94.8931
AO090005001201	0	1.71468	93.8147	48.6897	3.8512
AO090005001199	7.05956	47.9661	0	33.7629	0
AO090005001198	63.9623	14.6121	115.448	43.0894	27.5313
AO090005001197	37.3543	161.292	0	0.174964	0.164497
AO090005001196	35.4125	116.654	86.4339	0	0
AO090005001195	0	37.8749	73.7971	0	82.8432
AO090005001194	0	0	0	0	0
AO090005001193	0	0	0	0	0
AO090005001192	2247.71	2564	2826.28	1521.31	1980.42
AO090005001191	0	0	0	0	0
AO090005001189	0	0	0	0	0
AO090005001187	0	0	0	0	0
AO090005001186	51.4118	0	50.361	0	0
AO090005001185	0	0	1.06865	31.4545	0
AO090005001183	34.3088	0	0	0	0
AO090005001182	65.2483	1.2972	105.709	0	64.5931
AO090005001181	0	0	0	0	0
AO090005001180	3.00309	0	0	0	0
AO090005001179	2.63339	0	11.1803	0	7.69617
AO090005001177	0	0	32.06	0.0509816	0
AO090005001176	43.7369	64.8687	52.0767	89.8453	271.992
AO090005001175	26.9419	0	0	21.5329	0
AO090005001174	6.80303	0	0	0.0468638	0
AO090005001173	0	0	0	0	0
AO090005001172	0	0	0	0	0
AO090005001171	0	0	0	0	0
AO090005001170	0	5.67089	0.262846	0	0
AO090005001169	0	0	16.5265	0	0
AO090005001168	0	0	0	0	0
AO090005001166	0	0	0	0	0
AO090005001165	0	0	0	0	0
AO090005001164	0	0	0	0	0
AO090005001162	0	0	16.4233	0.614455	0
AO090005t00017	0	0	0	0	0
AO090005001160	0	0	0.159888	0	0
AO090005001159	0	0	4.47686	0.20007	0
AO090005001158	0	0	60.1787	58.2052	0
AO090005001157	42.9446	41.7448	17.087	0	0
AO090005001154	124.444	266.067	188.616	112.696	42.49
AO090005001153	0	17.8155	0	0	153.969
AO090005001665	0	40.3728	24.4285	115.313	0
AO090005001150	471.219	92.5215	197.08	866.062	1288.94
AO090005001149	13.61	0	0	20.2787	68.5755
AO090005001148	195.361	415.046	248.363	175.066	202.838
AO090005001147	2.04712	15.865	0	0	0
AO090005001144	1.38931	44.2426	0	135.253	0
AO090005001143	31.333	22.3247	0	52.7804	64.0759
AO090005001142	15.2745	0	0	0	0
AO090005001141	46.0035	75.507	0	0	0
AO090005001140	0	0	0	0	0
AO090005001139	0	0.0525636	0	0	0
AO090005001138	0	23.9509	36.4172	0	45.4221
AO090005001136	17.8498	42.8791	58.3997	31.0324	0
AO090005001664	0	24.1685	48.5527	0	0
AO090005001133	44.9383	27.0201	28.2062	21.0141	4.20975
AO090005001132	4726.39	3617.7	1848.71	1682.81	904.058
AO090005001131	0	0	4.1865	0	72.6274
AO090005001130	0	0	0	0	53.6587
AO090005001128	0	0	0	0	0
AO090005001126	0	0	27.3556	0.0382038	98.2002
AO090005001124	121.078	209.108	485.169	165.367	258.081
AO090005001123	9.09922	45.9381	0.366907	0	0
AO090005001122	320.577	163.905	251.785	280.026	771.589
AO090005001121	32.3411	33.4604	54.4114	41.2965	139.183
AO090005001120	1.64135	25.6861	0	0	91.0725
AO090005001119	0	22.9122	0	0	0
AO090005001118	60.724	147.188	109.857	0	160.639
AO090005001117	27.4022	39.4206	198.169	181.801	447.267
AO090005001116	24.9877	1.09577	91.7039	0	146.036
AO090005001115	0	0	0	0	0
AO090005001114	84.7614	151.377	128.539	63.7432	21.2019
AO090005001113	10.9446	10.8329	2.95912	12.6077	0
AO090005001112	33.5222	106.542	0	1.62501	0
AO090005001111	0	0	0	0.0595771	85.1954
AO090005001110	0	61.5069	0	0	0
AO090005001109	0	0	0	0	0
AO090005001108	0	0	0	97.7132	1.32572
AO090005001107	0	0	0	0	510.585
AO090005001105	37.0063	45.4006	36.0287	42.9983	180.472
AO090005001102	88.3477	14.5339	88.0916	128.496	259.673
AO090005001100	0.705446	30.6428	38.131	0	0
AO090005001099	0	41.4067	0	55.1723	76.073
AO090005001098	50.1034	36.7576	72.0868	91.1133	3.59844
AO090005001097	0	0	0	0	0
AO090005001096	0	0	0	0	45.6833
AO090005001095	303.649	620.443	439.612	55.1904	7.68329
AO090005001094	0	0	11.8618	0	0
AO090005001093	88.5873	322.976	262.961	152.799	381.643
AO090005001092	54.1852	304.455	37.1714	177.412	662.291
AO090005001090	35.9544	52.3246	0	73.9046	246.563
AO090005001089	5.84871	25.4301	2.66732	0	0
AO090005001088	0	78.0198	148.865	63.1388	198.061
AO090005001087	4.40722	62.8042	61.0661	86.2265	107.096
AO090005001086	2.37602	0	0	0	0
AO090005001085	38.5149	0	0	0	0
AO090005001084	130.282	309.929	323.794	0	0
AO090005001083	0	0	0	0	0
AO090005001081	0	0	0	251.664	241.478
AO090005001079	0	0	0	0	0
AO090005001078	0	0	0	26.6672	0
AO090005001077	799.51	931.36	1486.19	1018.15	1088.33
AO090005001076	24.0488	17.5502	62.86	71.9701	44.6437
AO090005001075	50.431	35.3689	0	0	85.2178
AO090005001074	141.294	360.028	33.0625	25.9169	0
AO090005001073	69.5656	140.494	0.335224	52.6773	105.179
AO090005001072	75.8097	261.819	98.7753	146.902	37.8759
AO090005001071	41.1708	2.16624	18.0181	1.06565	37.1137
AO090005001069	0	0.762959	0	0	78.0032
AO090005001068	0	2.74009	0	0	0
AO090005001067	0	15.2679	0	0	0
AO090005001066	4.98494	0.186687	0	0	0
AO090005001065	278.129	171.524	71.1261	0.0977518	67.1815
AO090005001063	45.4088	79.957	38.3252	42.5368	56.724
AO090005001062	53.5713	161.013	33.2031	3.8156	0
AO090005001061	0	4.92455	45.6313	66.5798	0
AO090005001060	50.6983	0	0	41.835	0
AO090005001059	9547.31	6477.37	4446.65	4172.74	3275.3
AO090005001058	0	0	58.0445	0	0
AO090005001057	0.997518	6.93659	0	2.37069	4.69999
AO090005001056	0	0	6.77728	9.56998	0
AO090005001055	0	0	0	0	0
AO090005001054	0	0	0	0	0
AO090005001053	7.70926	0	0	0	14.6556
AO090005001052	82.3446	0	0	4.40785	218.133
AO090005001051	0	0	0	0	0
AO090005001050	0	0	0	0	0
AO090005001049	0	0	0	0	0
AO090005001048	0	0	0	0	0
AO090005001047	0	0	0	0	0
AO090005001046	0	0	0	0	0
AO090005001045	28.0776	0	0	0	0
AO090005001044	59.7052	12.5409	51.4336	0	104.649
AO090005001042	0	0	39.0653	0	0
AO090005001041	0	0	52.8371	0	0
AO090005001038	0	0	0	0	0
AO090005001036	21.464	2.23902	16.0808	15.3837	62.9376
AO090005001035	11.0544	113.059	172.034	24.5949	0.100537
AO090005001033	9.31351	7.07856	0	0	0
AO090005001032	0	3.65583	10.0003	0.322546	3.99737
AO090005001031	0	0	0	0	0
AO090005001030	0	0	0	0	0
AO090005001028	32.3626	18.4117	47.2047	0	0
AO090005001027	0	0	0	0	0
AO090005001026	0	0	0	0	0
AO090005001025	0	0	0	0	0
AO090005001024	0	0	0	0	0
AO090005001023	0	0	0	0	0
AO090005001021	160.74	192.343	327.689	81.2367	61.4796
AO090005001020	0.0402858	85.8294	38.0168	0	117.098
AO090005001019	44.9998	0	0	0.177906	0
AO090005001018	0	60.7296	0	96.596	107.3
AO090005001017	0	0	0	0.0462136	0
AO090005001016	0	0	0	0	0
AO090005001015	0	0	0	0	0
AO090005001014	0	0	0	0	0
AO090005001012	8.34949	33.9344	0	30.881	0
AO090005001010	0	0	0	0	0
AO090005001009	18.8129	66.8793	5.84735	4.8225	16.7658
AO090005001008	190.923	340.026	88.5857	238.919	342.008
AO090005001005	0.270385	0.108854	0.0592834	40.9898	0
AO090005001004	47.295	1.47934	75.6287	59.3481	0
AO090005001002	35.5191	51.2573	115.015	0	18.387
AO090005001001	0	0.463236	49.0492	0	0
AO090005001000	0	0	34.9758	61.7297	0
AO090005001663	0	0.0176915	2.5051	37.8857	0.02348
AO090005000996	2266.36	1248.38	1372.83	2801.9	2223.43
AO090005000995	44.8947	191.534	419.916	47.8806	109.507
AO090005000994	0	0	0	0	0
AO090005000993	0	0	0	0	0
AO090005000992	0	0	0	0	0
AO090005000991	0	0	0	0	0
AO090005000990	0	0	0	0	0
AO090005000988	0	0	0	0	0
AO090005000987	0	0	0	30.7391	0
AO090005000986	0	0	0	0	0
AO090005t00016	0	0	0	0	0
AO090005t00015	0	0	0	0	0
AO090005t00014	0	0	0	0	0
AO090005000985	0	0	0	0	0
AO090005000984	0	0	0	0	0
AO090005000983	0	0	0.69046	0	0
AO090005000980	0	0	28.7905	0	0
AO090005000978	20.6221	59.2453	60.7789	67.2893	3.67288
AO090005000977	0.189399	27.1451	0	57.9631	0
AO090005000976	41.0873	78.8322	58.9127	0	124.699
AO090005000975	0.0702676	19.6892	53.1219	0	0
AO090005000973	73.1636	33.4038	0.446041	0.9084	271.589
AO090005000972	0	0	0	0	0
AO090005000971	0	0	0	0	0
AO090005000970	0	0	0	0	0
AO090005000968	0	0	0.0427023	96.0747	0
AO090005000967	0	0	0	21.424	0
AO090005000966	0	0	0	0	0
AO090005000965	0	0	0	0	0
AO090005000964	0	0	0	0	0
AO090005000963	0	0	0	0	0
AO090005000962	0	0	0	0	0
AO090005000961	0	0	0	0	0
AO090005t00013	0	0	0	0	0
AO090005000959	0	0	0	0	0
AO090005000958	0	0	0	0	0
AO090005000957	0	0	0	0	0
AO090005000956	0	0	0	0	0
AO090005000955	0	0	0	0	0
AO090005000954	0	0	0	0	0
AO090005000953	0	0	0	0	0
AO090005000952	0	0	0	0	0
AO090005000951	0	0	0	0	0
AO090005000949	0	0	0	0	0
AO090005000945	0	0	0	0	0
AO090005000944	0	0	0	0	0
AO090005000943	0	0	0	0	0
AO090005000942	47.6669	47.8952	0	0	31.6
AO090005000941	117.805	156.35	0	0	86.1005
AO090005000940	0	0	0	0	0
AO090005000939	0	0	0	0	1.34446
AO090005000937	0	0	0	7.54585	0
AO090005000936	14.4465	14.8608	32.1932	0	0
AO090005000935	3.32083	35.4086	40.6419	0.571902	0
AO090005000934	21.4961	34.0989	32.5152	1.50423	51.4581
AO090005000933	0	0	0	0	76.4577
AO090005000932	0	0	0	0	0
AO090005000931	0	0	0	0	0
AO090005000930	0	0	0	0	0
AO090005000928	0	0	0	0	0
AO090005000927	0	0	0	0	0
AO090005000926	0	0	0	0	0
AO090005000925	0	0	0	0	0
AO090005000924	0	0	0	0	0
AO090005000923	0	0	0	0	0
AO090005000922	0	0	0	0	0
AO090005000921	0	0	0.159033	0	0
AO090005000919	0	78.7786	0	0	81.296
AO090005000918	29.6943	27.3633	56.2655	165.127	204.706
AO090005000917	0	0	0	0	0
AO090005000916	0	0	0	0	0
AO090005000915	0	0	0	0	0
AO090005000913	0	0	0	0	0
AO090005000912	0	15.6474	0	0.0563481	0
AO090005000910	0	0	0	0	0
AO090005000909	0	0	0	0	0
AO090005000908	19.1423	6.1652	34.4718	0.65273	51.0035
AO090005000907	0	0	0	0	0
AO090005000906	2.84837	15.0937	0	0	0
AO090005000905	0.399603	33.0333	0	0.353267	0
AO090005000904	155.634	318.162	196.126	229.737	52.2174
AO090005000903	31.6793	0	0	0	0
AO090005000902	0	0	6.72885	10.5374	3.41621
AO090005000901	0	0	0	0	0
AO090005000900	57.5273	329.032	58.1574	248.149	205.806
AO090005000899	0	12.668	0	0	0
AO090005000898	160.772	122.825	333.87	7.97047	105.321
AO090005000897	514.592	242.685	0.0664667	27.4791	0
AO090005000896	66.5474	95.9608	119.255	50.8407	0
AO090005000895	0	0	0	0	0
AO090005000894	14.0038	30.3764	64.3312	50.7119	0
AO090005000893	0	5.33752	0	65.9822	106.41
AO090005000892	281.841	548.576	485.578	631.367	136.009
AO090005000891	0	0	44.1782	0	0
AO090005000890	0	0	0	0	0
AO090005000888	566.902	978.467	460.248	434.822	1021.66
AO090005000887	0.123918	39.0125	0	0	168.242
AO090005000886	184.87	353.452	322.269	222.397	814.365
AO090005000885	0	82.5732	3.50227	94.9081	0
AO090005000884	23.0817	0.0508132	0.055347	23.4199	0
AO090005000883	102.699	195.912	438.387	176.167	147.303
AO090005000882	40.5182	15.8659	16.3313	55.7633	30.3738
AO090005000881	0	0	0	0	0
AO090005000880	301.707	325.858	211.763	296.606	428.527
AO090005000879	0	42.1807	0	0	95.916
AO090005000878	165.54	158.632	125.984	225.108	227.468
AO090005000876	33.0708	0	0	0	0
AO090005000875	0	0	0	0	0
AO090005000874	0	0	0	0	0
AO090005000873	0	0	0	0	0
AO090005000872	0.346058	5.92742	9.68443	6.79404	49.7895
AO090005000871	14772.6	8545.64	6456.92	276.413	0.478592
AO090005000870	0	0	0	0	0
AO090005000869	0	0	0	0	0
AO090005000868	0	0	0	0	0
AO090005000867	0	43.9439	0	0	72.9281
AO090005000866	81.9915	100.614	185.068	182.541	141.041
AO090005001662	0	45.8864	65.57	59.464	0
AO090005000863	0	20.0709	0	20.6594	33.9315
AO090005000861	0	0	0	0	0
AO090005000860	0	138.418	37.5239	65.3256	0.204725
AO090005000858	0.242208	35.1689	54.6633	42.3046	0
AO090005000857	9.78533	3.52678	78.5454	52.7514	0
AO090005001670	107.662	285.001	136.975	0.300373	136.683
AO090005000854	60.5728	3.3137	15.7084	0	199.578
AO090005000853	189.603	127.054	205.428	137.665	152.054
AO090005000852	0	0	0	0	0
AO090005000851	34.1005	0.0163435	0	42.8202	0
AO090005000850	0	0	0	0	0
AO090005000849	0	0	0	0	0
AO090005000846	0	0	0	30.8589	50.9795
AO090005000845	9.48505	5.24308	0	137.111	56.4629
AO090005000844	0	0.0362384	135.822	0.102311	0
AO090005000843	32.6595	13.3077	0.0385507	8.44358	83.7058
AO090005000842	0	0.269945	0	0	0
AO090005000841	2.52932	23.6212	5.76438	0.161966	85.8266
AO090005000840	870.254	989.167	731.424	580.447	356.074
AO090005000838	23.2568	75.4209	6.52908	78.9838	264.59
AO090005000837	113.385	90.8718	205.933	39.628	45.6079
AO090005000836	0	0	0	0	0
AO090005000835	129.726	78.6216	100.961	21.054	0.850275
AO090005000834	13.5719	122.26	51.4525	145.017	124.101
AO090005000833	48.4242	138.067	193.8	199.041	174.067
AO090005000831	140.148	142.982	65.2174	63.3917	62.7778
AO090005000830	103.766	0	77.3542	3.83315	46.2161
AO090005000829	0	0	0	0	0
AO090005000828	0.0195555	0	0	32.8075	0.982183
AO090005000827	0	0	0	0	0
AO090005t00012	0	0	0	0	0
AO090005t00011	0	0	0	0	0
AO090005000826	0	0	0	0	0
AO090005000825	5.22624	95.8269	151.315	134.973	178.222
AO090005000824	38.2887	73.4233	93.8374	58.2986	158.647
AO090005000823	0	0	0	0	0
AO090005000822	0.147523	42.8805	92.076	2.23571	25.171
AO090005000821	10.3154	0.530156	0	34.4883	0
AO090005000820	3.38791	5.03218	36.5781	46.3291	0
AO090005000818	0	0	2.96544	0	0
AO090005000817	6.26934	8.78718	0	0	0
AO090005000816	0	23.9875	0	0	0
AO090005000815	0.776738	31.6688	74.1908	0	0
AO090005000813	34.3389	73.7613	0.448007	68.1261	0
AO090005000812	0	133.562	189.7	134.748	186.899
AO090005000811	17.7584	75.2625	65.2863	9.70119	30.1943
AO090005000810	12.7341	33.9042	0	0	0.108864
AO090005000809	46.8534	60.0874	0	44.3981	195.472
AO090005000808	81.5777	68.7037	0	83.319	245.226
AO090005000807	0.0296446	36.6871	8.03368	30.5276	0.031679
AO090005000806	75.0328	39.5654	68.9928	57.5304	70.2706
AO090005000805	0	0.0379435	0.289302	0	0
AO090005000804	0	14.3877	29.1812	0	0
AO090005000803	1608.48	1243.48	2040.96	2450.64	4042.53
AO090005000802	0	0	0	67.3085	0
AO090005000801	0	0.0412344	0	0	0
AO090005000799	0	0	0	0	0
AO090005000798	0	0	0	0	0
AO090005000797	12.2524	0	41.1612	0	66.3539
AO090005000796	37.9409	45.548	0.491749	25.7757	112.824
AO090005000793	42.2469	34.6719	0	0	0
AO090005000791	0.859146	0.0160876	2.85626	0	18.7038
AO090005000790	46.0081	1.96565	0	0	0
AO090005000789	151.758	103.895	102.991	367.841	186.076
AO090005000788	14.5279	17.0965	6.86072	10.1618	0.955382
AO090005000787	12.6758	3.95083	0	0	7.86524
AO090005000786	69.8762	27.1794	0	0	12.7899
AO090005000785	141.068	6.68908	43.5403	52.706	13.1885
AO090005000784	25.8043	65.6045	0	0	0
AO090005000783	0.11207	0	0.270292	135.566	0
AO090005000782	208.88	56.5793	257.934	225.012	279.142
AO090005000781	0.142347	21.4904	27.9646	55.9814	45.1532
AO090005000780	224.435	294.636	365.881	88.5863	122.886
AO090005000779	0	44.0367	66.9785	0	0
AO090005000778	0	6.56721	0	0.182491	0
AO090005000776	0	3.85895	0.0375291	0	0.73165
AO090005000775	0	32.9	0	0	0
AO090005000773	12.8614	0	0	2.30108	0
AO090005000771	532.869	241.065	202.052	139.022	106.674
AO090005000770	0.124994	0	0	0.473574	56.4121
AO090005000769	0	0	0	0	0
AO090005000768	0	0	0	0	0
AO090005000767	0	0	0	0	0
AO090005000765	10.025	52.8117	106.453	127.284	438.802
AO090005000763	14.5824	16.1067	16.0483	86.8706	20.4089
AO090005000761	1454.17	1189.39	986.85	1233.06	643.692
AO090005000760	105.823	124.748	168.925	48.7299	180.389
AO090005000759	49.1252	33.7215	50.6513	3.65463	36.1866
AO090005000758	143.664	0	52.1035	58.1133	109.492
AO090005000757	152.387	0	10.2711	0	88.4995
AO090005000756	14.0163	39.177	36.1019	0	40.3849
AO090005000754	0	65.2239	46.2058	60.9537	106.159
AO090005000753	0	6.89822	0.736638	0	0
AO090005000752	0	49.5431	0	0	0
AO090005000751	58.389	24.756	37.4787	5.37025	25.3202
AO090005000750	4.06286	43.2191	43.1863	0	25.3307
AO090005000749	1334.77	1578.84	1766.16	1068.38	1286.8
AO090005000747	0	0	0	0	0
AO090005001661	76.6039	102.607	0	53.4821	0
AO090005000743	0	0	0	0	0
AO090005000742	0	0	0	0	0
AO090005000740	0	0	0	0	0
AO090005t00010	0	0	0	0	0
AO090005000739	533.431	333.344	91.3805	739.163	1279.9
AO090005000738	58.2214	0	70.2096	65.858	0
AO090005000737	3702.07	2729.86	2417.65	2695.34	1390.33
AO090005000736	9.43168	0	0	0	0.111988
AO090005000735	0	0	0	0.750874	0
AO090005000734	58.8064	0	0	30.9542	0.134422
AO090005000733	0	0	0	0	0
AO090005000731	146.122	56.3024	213.043	0	0
AO090005000730	1066.61	839.529	604.993	479.403	511.642
AO090005001669	155.252	512.698	425.873	235.802	609.016
AO090005000727	29.982	49.753	12.2127	41.3786	13.2241
AO090005000726	7.10063	8.21056	0	0	0
AO090005000725	0.663633	16.761	2.85072	0	0
AO090005000724	7.92266	0	57.549	0	18.311
AO090005000723	0.870297	0	2.98671	0	54.2649
AO090005000722	1.38024	10.0321	16.5217	0	0
AO090005000720	59.9785	24.2081	0	49.0536	150.761
AO090005000719	66.4442	31.3675	169.454	60.5186	19.224
AO090005000718	54.9265	89.8058	21.2194	210.231	53.6815
AO090005000717	0	0	0	0	0
AO090005000716	5.16009	0	0	1.14044	0
AO090005000715	77.991	100.985	33.625	33.082	77.3644
AO090005000714	4.6032	0	0	0.0351937	0
AO090005000713	0	0	0	0	0
AO090005000712	0	0	0	0	0
AO090005000710	0	0	0	0	0
AO090005000709	0	0	0	0	0
AO090005000708	0	0	0	0	0
AO090005000707	0	32.7414	0	0	0
AO090005000706	0	0	0	51.4725	72.6988
AO090005000705	0	0	0	0.0893953	0
AO090005000704	0	0	0	0	0
AO090005001660	0	2.43388	0.0149776	2.2711	0
AO090005000701	0	14.6072	0	0	0
AO090005000700	0	9.79542	0.160442	0	0
AO090005000698	0	0	0	0	0
AO090005000697	46.7175	205.564	111.058	36.8311	97.439
AO090005000696	8.81009	9.14908	26.1418	0.0256764	24.2006
AO090005000695	0	36.462	0	0	0
AO090005000694	29.2906	0.51915	0	0	63.192
AO090005000693	0	0	0	0	0
AO090005000692	0	0	0.297391	0	0
AO090005000691	0	0	0	0	66.8733
AO090005000690	43.9444	31.9688	82.6983	62.3542	289.715
AO090005000689	0	0	0	0	0
AO090005000688	0.0240637	0	0	9.70977	0.0514302
AO090005000687	0	0	0	0	0
AO090005000686	0	0	0	0	0
AO090005000685	0	0	0	0	0
AO090005000684	0	0	0	0	0
AO090005000683	0	0	0.194919	0	0
AO090005000682	0	0	0	0	0
AO090005000681	0	0	0	0	0
AO090005000680	0	0	0	0	0
AO090005000679	0	0	0	0	0
AO090005000678	0	0	0	0	0
AO090005000676	0	0	0	0	0
AO090005000675	0	0	0	0	0
AO090005000674	0	0	0	0	0
AO090005000673	0	0	0	0	0
AO090005000672	0	0	0	0	71.7661
AO090005000671	0	0	0	0	0
AO090005000670	0	0	0	0	0
AO090005000669	0	0.214984	0	113.401	83.7904
AO090005000668	235.156	238.432	389.075	193.667	37.1632
AO090005000667	128.85	52.4278	110.843	93.0101	208.057
AO090005000666	93.4895	239.923	160.283	372.624	362.292
AO090005000665	32.334	43.3912	143.4	106.247	0.689998
AO090005000664	0	9.97533	35.3006	0	0
AO090005000663	29.3086	58.2564	49.1779	0	0
AO090005000662	0	0	0	0	0
AO090005000661	0	0	0	0	0
AO090005000660	0	0	0	0	0
AO090005t00009	0	0	0	0	0
AO090005000658	0.497793	0	42.5419	0	0
AO090005000657	0	0	0	0	0
AO090005000656	0	0.450227	51.6552	0	0
AO090005000655	40.3206	46.5735	1.62925	3.88712	0
AO090005000653	0	0	0	0	0
AO090005000652	97.4477	47.1839	120.015	157.723	122.723
AO090005000650	26.8035	0.382461	80.401	2.00534	214.496
AO090005000649	0	0	8.65973	58.2228	0
AO090005t00008	0	0	0	0	0
AO090005000648	2.26639	96.1309	197.064	100.88	245.61
AO090005000647	7.76883	2.67217	21.7633	1.26453	0.0806018
AO090005000646	272.271	341.191	322.465	76.4659	194.875
AO090005000645	21.8473	74.0677	62.7643	0	0.994721
AO090005000644	0	0	0	0	0
AO090005000642	0	0	16.1143	99.7872	0
AO090005000641	308.92	598.87	212.53	239.96	914.419
AO090005000639	89.5689	151.856	336.648	162.34	186.122
AO090005000638	0	49.1995	0	0	0
AO090005000637	0	38.352	0	17.8511	13.3926
AO090005000634	0	0	0	0	0
AO090005000633	0	0	0	0	0
AO090005000632	0	0	0	0	0
AO090005000631	375.992	824.72	607.277	0	0.151889
AO090005000630	75.2446	40.0404	136.31	62.2511	89.3344
AO090005000629	219.982	284.806	264.483	25.5422	1.29693
AO090005000628	35.4533	64.0552	47.9672	24.5715	46.8959
AO090005000627	43.189	0	53.4121	42.7486	0
AO090005000626	12.9501	21.3724	77.5508	27.2141	0
AO090005000625	28.8631	0	38.059	54.7161	82.2326
AO090005000624	36.8874	6.80788	137.656	105.807	53.4591
AO090005000623	97.6317	79.6958	262.344	119.632	57.5738
AO090005000622	31.9418	15.5717	36.7552	0	9.15234
AO090005000621	3.44309	0.0187319	49.2125	2.19474	0.323189
AO090005000620	5.55309	27.6107	0.0710976	56.0691	59.9916
AO090005000619	7.84675	50.5883	96.2493	0.123873	151.051
AO090005000618	110.075	116.56	93.2189	33.1792	66.3778
AO090005000617	1551.73	2346.66	2499.6	1566.61	1461.1
AO090005000616	108.88	116.765	88.9313	129.931	92.8802
AO090005000615	47.8219	36.9126	30.8179	0	0
AO090005000614	117.863	153.952	297.089	0	132.852
AO090005000613	0.95504	25.0806	1.41746	41.1665	76.7007
AO090005001659	11.5697	7.75324	3.18842	0	21.4988
AO090005000610	0	0	0	0	0
AO090005000609	0	0	0	12.8511	0
AO090005000608	0	0	0	0	0
AO090005000607	0	0	0	0	0
AO090005000606	0	0	0	0	0
AO090005000605	8.44411	58.4378	25.9199	66.5129	83.5587
AO090005000604	2173.3	2034.02	2009.96	1128.89	2380.14
AO090005000603	2.56202	0	101.972	42.7389	3.05995
AO090005001658	76.4731	81.7568	3.52457	49.8241	3.52504
AO090005000599	38.5503	0	0	0	0
AO090005001657	35.5095	51.658	41.729	54.504	16.6982
AO090005000596	133.605	0.0432205	0	93.2873	65.3351
AO090005000595	0	0	0	59.5145	93.5914
AO090005000594	0	0	0	0	0
AO090005000593	0	0	0	0	0
AO090005000592	65.4023	60.8537	67.5449	219.425	687.321
AO090005000591	2.04012	0	45.3144	0	0
AO090005000590	9.16025	70.2137	213.004	163.915	52.1089
AO090005000589	39.5881	35.2751	26.2201	32.5948	8.05669
AO090005000588	43.1276	338.803	69.8534	0.0460715	2.59891
AO090005000587	0	28.0642	0	0	0
AO090005000585	0	0	0	0	0
AO090005000584	0	0	0	0	0
AO090005000583	95.4206	0	0	1420.5	1097.32
AO090005000582	404.278	360.07	1082.55	776.969	2486.77
AO090005000581	2.30339	6.24397	109.491	0	0
AO090005000580	0	0	9.69985	0	0.454577
AO090005000579	51.8241	9.64944	0.0941792	15.1595	26.3247
AO090005000578	42.8324	47.8744	0	0	63.574
AO090005000577	923.696	930.314	832.868	239.693	30.3373
AO090005000576	40.7028	71.1707	79.2594	11.6089	0
AO090005000575	70.4228	28.2076	53.3498	99.4801	72.0087
AO090005000574	24.6478	17.5611	7.19344	10.7118	0.28774
AO090005000573	0	0	0	0	0
AO090005000572	0	0.210254	33.8941	48.478	331.88
AO090005000571	0	0	0	0	0
AO090005000570	0	0	0	0	0
AO090005000569	0	0	0	0	0
AO090005000568	31.6135	41.6872	76.6174	0	0
AO090005000567	0	0	0	0	0
AO090005000566	0	0	0	0	0
AO090005000562	0	0	0	0	0
AO090005000561	0	0	0	0	0
AO090005000560	0	0	0	0	0
AO090005000559	0	0	0	0	0
AO090005001656	0	0	0	0	0
AO090005000556	0	0	0	0	0
AO090005000555	0	0	0	0	0
AO090005000554	0	0	0	0	0
AO090005000553	0	0	0	0	0
AO090005000551	0	0	0	62.516	0
AO090005000550	0	0	0	0	0
AO090005000549	0	0	0	0	0
AO090005000548	0	0	0	0	0
AO090005000547	0	0	0	0	0
AO090005000546	0.0538607	0	0	0	0
AO090005000545	0	0	0.364977	0	0
AO090005000544	0	0	39.4619	0	0
AO090005000543	197.205	32.8613	38.8477	0	0
AO090005000539	126.85	20.2826	0	0	0
AO090005000538	84.7606	432.016	589.222	0	0
AO090005000537	0	0	0	0	0
AO090005000536	0	1.28898	0	0	0.0259201
AO090005000535	18.1858	0	0	0	0
AO090005000534	0	0	0	0	0
AO090005000533	0	0	0	0	0
AO090005000532	0	0	0	0	0
AO090005000531	0	0	0	0	0
AO090005000530	0	0	0	0	0
AO090005000529	0	0	0	0	0
AO090005000528	0	0	0	0	0
AO090005000527	0.350982	0	0.0439742	0.227964	0
AO090005000526	27.4466	36.0287	0	0.203235	0
AO090005000524	0	0	0	0	0
AO090005000523	0	0	0	0	0
AO090005000522	0	0	0	0	0
AO090005000521	0	0	0	0	0
AO090005000520	0	0	0	0	0
AO090005000519	0	0	0	0	0
AO090005000518	0	0	0	0.0475075	0
AO090005000517	0	0	0	0	0
AO090005000515	0	0	0	0	0
AO090005000514	0	0	0	0	0
AO090005000513	0	0	0	0	0
AO090005000512	0	0	0	0	0
AO090005000511	0	0	0	0	0
AO090005000510	0	0	0	0	0
AO090005000509	0	0.0654077	0	381.148	222.36
AO090005000507	0	0	0	0	0
AO090005000506	0	0	0	0	0
AO090005000504	0	0	0	0	0.122184
AO090005000503	0	0	0.058263	0	1.34885
AO090005000502	88.3448	52.2541	0	0	0
AO090005000501	0	0	0	0	0.0795777
AO090005t00007	0	0	0	0	0
AO090005000500	0	0	0	0	0
AO090005000499	0	0	0	0	0
AO090005000498	0	0	0.0658986	0	0
AO090005000497	21.3424	0	105.904	13.0784	166.326
AO090005000495	0	0	0	0	0
AO090005000494	0	0	0	0	0
AO090005000493	0	0	49.319	0.144121	0
AO090005t00006	0	0	0	0	0
AO090005000491	0	0	0	0	0
AO090005000490	0	0	0	0	0
AO090005000489	0	0	2.57005	0	0
AO090005000488	0	0	0	0	0
AO090005000486	0	0	0	0	0
AO090005000485	0	0	0	0	0
AO090005000484	0	0	0	0	0
AO090005000483	21.8011	0	0	0	49.9509
AO090005000482	0	0	0	0	0
AO090005000481	63.4359	100.329	225.055	0	0
AO090005000480	0	0	0	0	48.4938
AO090005000479	0.31804	15.4786	177.43	50.6493	145.312
AO090005000478	0	0	0	87.1604	23.2625
AO090005000477	0	0	5.94011	0	0
AO090005000476	0	0	17.4948	0	0
AO090005000475	37.4878	8.73575	79.7832	0	0
AO090005000474	0	0	0	30.2831	0
AO090005000473	0.326948	0	0	0	0
AO090005000472	0	0	0	0	0
AO090005000471	3.96005	0	0	5.63204	0.0212654
AO090005000469	71.0834	35.4553	44.6875	55.7306	80.5553
AO090005000465	51.7399	80.7313	67.3531	44.4693	0
AO090005000464	116.054	73.2714	160.097	109.175	354.619
AO090005000463	94.7709	66.9692	60.9612	17.2459	36.3333
AO090005000461	45.2444	26.6353	39.9235	42.9174	91.7176
AO090005000460	0.751518	13.452	21.9024	79.2651	0
AO090005000459	622.567	291.054	561.533	353.503	146.673
AO090005000458	0.520535	20.0482	0	1.18331	0
AO090005000457	103.512	70.7912	61.0984	125.698	0.301132
AO090005000456	813.913	1860.29	1738.65	732.934	715.059
AO090005000455	71.4057	10.0378	0	94.1136	81.8411
AO090005000454	0	0	0	0	0
AO090005000453	6.69356	21.7885	0.0501745	0	0.122272
AO090005000451	222.18	262.71	220.335	108.189	114.992
AO090005000450	75.1002	21.0685	39.5386	35.8568	0
AO090005000449	0.0379661	0	0	0	0
AO090005000448	0	0	0	0	0
AO090005000447	0.0473781	0	0	0	0
AO090005000446	3.97367	3.88803	0	0.028586	0.0806274
AO090005000445	83.7977	216.264	205.528	65.6698	22.3267
AO090005000444	68.3526	42.8244	63.083	0.0467177	98.5187
AO090005000443	1.78848	87.7823	0	8.10272	2.26116
AO090005000442	81.4805	35.5795	0	76.215	0
AO090005000441	13.8515	86.0371	33.657	0	0.256313
AO090005000440	25.3106	0	0	0	0.10995
AO090005000439	19.4985	39.8547	0	0	15.3
AO090005000438	1185.99	1763.73	1558.69	1705.12	2156.35
AO090005000437	34.0228	44.2158	61.1318	0.226148	0
AO090005000436	842.101	1150.85	1525.55	1024.94	1867.29
AO090005000435	31.0226	36.9844	41.0419	11.2415	47.0517
AO090005000434	0	0	0	0	0
AO090005000433	60.9137	116.707	55.8898	261.075	393.161
AO090005000432	93.6544	227.034	28.0254	103.334	144.027
AO090005000430	2.9051	0.619183	49.2333	0	234.205
AO090005000429	2.42285	7.05147	0	0	0
AO090005000428	785.903	787.942	908.592	992.816	1041.73
AO090005000427	18.2631	75.9918	74.1168	0	0
AO090005000426	0	0	0	0	0
AO090005000425	82.0573	59.3397	5.49893	96.2099	135.92
AO090005000424	0	0	0	37.579	0
AO090005000423	0	0	0	0	0
AO090005000422	0	0	0	0	0
AO090005000420	0	0	0	0	0
AO090005000419	4.46296	20.5697	0.0168712	0.0218652	2.61075
AO090005000418	0	0	0.505276	0	0
AO090005000417	35.5778	11.217	0	55.4612	0.0763443
AO090005000416	23.5808	94.5968	202.111	72.9929	40.9006
AO090005000414	52.9485	92.3371	0	0	277.207
AO090005000413	0	0	38.6517	0	0
AO090005000412	179.326	270.755	175.805	150.964	96.6669
AO090005000411	223.072	359.617	382.764	367.267	90.8912
AO090005000409	517.697	147.649	1018.56	195.783	1591.76
AO090005000408	0	0	5.80598	5.48896	0
AO090005000407	2.09362	1.19407	0	0	0
AO090005000406	11.3743	34.6573	0	17.8049	23.1583
AO090005000405	84.0735	394.748	48.9588	170.525	244.152
AO090005000404	0	0	0	0	0
AO090005000403	8.31294	0	0	0	0
AO090005000402	0	0	0	0	0
AO090005000401	0	0	0.316855	0	0
AO090005000400	0	0	0	0	0
AO090005000399	0	0	0	0	0
AO090005000398	0	0	0	0	0
AO090005000397	0	0	0.0366181	0	0
AO090005000396	0	0	0	0	0
AO090005000395	0	0	0	0	0
AO090005000394	0	0	0	0	0
AO090005000392	0	0	0	0	0
AO090005000391	0	0	0	0	0
AO090005000389	0	0	0	0	0
AO090005000388	0	0	0	0	0
AO090005000387	0	0	0	0	0
AO090005000386	0	0	0	0	0
AO090005000385	0	0	0.223482	0	0
AO090005000384	0	0	0.0413043	0	0
AO090005000383	0	0	0	0	0
AO090005000382	0	0	0	0	0
AO090005000381	0	0	0	0	0
AO090005000380	10.5953	77.916	34.0296	135.473	110.365
AO090005000379	0	44.1963	164.909	117.819	286.463
AO090005000378	33.8337	345.778	46.1302	0	0
AO090005000377	220.801	242.662	311.345	123.385	289.765
AO090005000376	140.257	374.649	160.778	112.889	0
AO090005000375	11.3225	55.0709	68.4341	72.1973	56.1428
AO090005000374	0	7.28929	0.028105	33.5468	37.6697
AO090005000372	6.12488	46.5676	0.08806	56.2643	0
AO090005000371	0	0	0	0	0
AO090005000368	0	0	0	0	0
AO090005000367	0	0	0	0	0
AO090005000366	0	4.11795	0	0	0
AO090005000365	0	0	0	0	0
AO090005000364	0	0	0	0	0
AO090005000363	0	0	0	0	0
AO090005000362	3.60773	0.901515	0	4.80767	1.72825
AO090005000361	0	0	0	0	0
AO090005000360	0	0	0	0	0
AO090005000359	0	0	0	0	0
AO090005000358	41.7946	0	0	0	0
AO090005000357	0	0	0	45.5169	0
AO090005000356	0	0	0	40.9636	0
AO090005000355	0	0	0	0	0
AO090005t00005	0	0	0	0	0
AO090005000354	158.075	51.4985	128.019	61.4144	120.583
AO090005000353	0.334316	5.17433	59.3898	0	0
AO090005000352	84.5821	185.625	178.293	179.863	285.369
AO090005000351	0	0	0	0	0
AO090005000350	0	0	0.0971867	0	0
AO090005000349	0	0	0	0	0
AO090005000348	0	0	0	0	0
AO090005000347	0	0	0	0	0
AO090005000346	0	0	0	0	0
AO090005000345	0	0	0	0	0
AO090005000343	0	0	0	0	0
AO090005000342	0	0	0	0	0
AO090005000341	0	0	0	0	0
AO090005000340	0	0	0	0	0
AO090005000339	0	0	0	0	0
AO090005000338	0	0	0	0	0
AO090005000337	0	0	0	0	0
AO090005000336	0	0	0	0	0
AO090005000334	0	0	0	0	0
AO090005000333	0	0	0	0	0
AO090005000332	0	0	0	0	0
AO090005000331	0	0	0	0	0
AO090005000330	0	0	0	0	0.641424
AO090005000327	51.0368	30.1891	40.322	0.243058	65.7367
AO090005000326	0	0	0	0	0
AO090005000325	0	0	0	0	0
AO090005000324	0	0	0	0	0
AO090005000323	0	0	0	0	0.0476883
AO090005000321	0	0	0	0	0
AO090005000320	0	0	0.0887924	0	0
AO090005000318	0	0	0	0	0
AO090005000317	0	0	0	0	0
AO090005000316	0	0	0	0	0
AO090005000315	0	0	0	53.3154	0
AO090005000314	0	0	0	0	0
AO090005000313	0	0	0	0	82.4964
AO090005000312	0	0	0	0	0
AO090005000311	0	0	0	0	0
AO090005000310	0	0	0	0	0
AO090005000309	0	0	0	0	0
AO090005000308	0	0	0	0	0
AO090005000307	0	0	0	0	0.0828934
AO090005000306	0	0	0	0	0
AO090005t00004	0	0	0	0	0
AO090005000305	65.4015	11.2266	3.52174	0	10.5689
AO090005000304	0	0	44.8018	0	0
AO090005001655	0	0	0	0	190.891
AO090005000301	0	0	0	0	0
AO090005000300	0	0	0	0	0
AO090005000299	0	0	0	0	0
AO090005000298	0	0	1.3553	0	0
AO090005000297	0	0	0	0	0
AO090005000295	0	0.386338	0	0	0
AO090005000294	0	0	0	0.218104	0
AO090005000293	0	0	0	0	0
AO090005000292	0	0	0	0	0
AO090005000291	0	0	0	0	0
AO090005000290	0	0	0	0	0
AO090005000289	0	0	0	0	0
AO090005000288	0	0	0	0	0
AO090005000287	0	0	0	0	0
AO090005000286	0	0	0	0	0
AO090005000284	37.2908	47.8325	56.6506	0	0
AO090005000282	0	0	0	0	0
AO090005000281	362.751	77.1556	311.332	0	0
AO090005000280	0	33.995	0	0	0
AO090005000279	0	0	0	0	0
AO090005000278	0.513775	0	0	17.8111	0
AO090005000277	38.3162	0	41.0718	59.7807	0
AO090005000276	8.55969	0	0	0	23.3848
AO090005000275	47.2238	88.8505	34.5276	0	0
AO090005000274	30.177	194.853	210.334	218.658	79.4595
AO090005000272	38.6407	0	18.9616	0	90.6687
AO090005000271	117.318	12.0417	67.8847	64.7783	0
AO090005000270	0	69.2143	0.472715	0	97.6203
AO090005000269	73.128	211.505	83.8265	178.745	85.794
AO090005000266	0.948477	0.369531	0	0.208658	0
AO090005000265	4762.68	3550.55	3265.05	3608.57	1274.9
AO090005000264	3.71187	0	1.19936	29.9772	0
AO090005000262	0	0	1.6784	32.0165	0
AO090005000260	0.976137	45.3678	43.6609	0	0
AO090005000259	110.385	181.567	155.142	119.245	0.982611
AO090005000258	8.86724	7.89226	14.0742	2.79822	3.02056
AO090005000256	0	0	0	0	0
AO090005000254	0	0	0	0	0
AO090005000253	0	0	0	0	0
AO090005000252	0	0	0	0	0
AO090005000251	0	0	0	0	0
AO090005000250	0	0	0	0	0
AO090005000249	0	0	0	0	0
AO090005000248	0	0	0	0	0
AO090005000246	0	0	0	0	0
AO090005000245	0	0	0	0	0
AO090005000244	0	4.85759	0	0	0
AO090005000243	83.5986	47.9352	0	0.15903	0.074758
AO090005000242	0	0	0	0	0
AO090005000241	0	0	0	0	0
AO090005000240	0	0	0	0	0
AO090005000239	0	0	0	0	0
AO090005000238	0	0	0	0	0
AO090005000237	0	17.9832	0	0	0
AO090005000236	0	35.1426	0	0	0
AO090005000235	0	0	0	0	0
AO090005000234	0	0	0	0	0
AO090005000233	0	0	0	0	0
AO090005000232	0	0	0.0366568	0	0
AO090005000231	707.147	892.333	958.309	0	0
AO090005000230	0	0	0	0	0
AO090005000228	0	0	0	0	0
AO090005000227	0	0	0	77.4099	76.4441
AO090005000226	0	0	0	0	0
AO090005000224	0	0	0	0	0
AO090005000223	0	0	0	0	0
AO090005000222	0	0	0	0	0
AO090005000221	0	0	0	0	81.9059
AO090005000220	0	0	0	0	0
AO090005000219	0	0	0	0	0
AO090005000218	0	0	0	46.6234	0
AO090005000217	0	0	0	0	0
AO090005000216	0	0	0.512924	0	0
AO090005000215	0	0	0	0	0
AO090005000214	0	0	0	0	0
AO090005000213	0	0	0	0	0
AO090005000211	0	0	0	0	0
AO090005000210	0	0	0	0	0
AO090005000209	0	0	0	0	0
AO090005000207	0	0	0	0	0
AO090005000204	0	0	0	0	3.25399
AO090005000203	0	0	0	0	0
AO090005000202	0	0	0	0	0
AO090005000201	0	0	0	0	0
AO090005000200	0	0	0	0	0
AO090005000198	19.4912	0	0	0	0
AO090005000197	35.3126	0	0	0	0
AO090005000196	0	0	0	0	0
AO090005000195	0	0	0	0	0
AO090005000194	0	0	0	0	0
AO090005000192	0	0	0	0	0
AO090005000189	46.1123	238.666	9.04678	55.7082	0
AO090005000188	0	0	0	0	0
AO090005000187	47.567	0	0	0	0
AO090005000186	0	0	0	0	0
AO090005000184	0	0	0	0	0
AO090005000183	0	0	0	0	0
AO090005000182	0	0	0	0	0
AO090005000180	180.765	268.253	315.916	413.586	577.012
AO090005000179	162.582	206.516	227.915	397.333	508.25
AO090005000176	0	31.6176	0	3.46403	2.2547
AO090005000174	0.0379297	0	45.906	0	0
AO090005000173	6.03059	0.499446	0	34.7819	165.604
AO090005000171	11.3242	27.8302	0.363034	41.4707	0
AO090005000170	0	30.0859	42.4359	0	0
AO090005000169	0	0	9.02996	0.117814	12.5904
AO090005000167	0	0	0	0	0
AO090005000166	45.1387	1.50143	2.53767	0	0.068713
AO090005000165	27.8924	10.281	12.4214	40.7211	107.535
AO090005000164	128.344	188.078	0	117.833	64.809
AO090005000162	36.5421	0.0285938	40.0214	49.3252	199.045
AO090005000161	0	0	0.0575384	0	0
AO090005000160	0	0	0	0	0
AO090005000159	141.473	131.376	41.8505	181.114	81.0226
AO090005000158	16.4562	0.0353339	3.57925	2.54382	9.47275
AO090005000157	220.531	199.07	161.518	59.0126	151.798
AO090005000156	96.6295	145.877	136.042	165.11	75.3839
AO090005000154	0	0	0	56.9845	0
AO090005001654	5.81692	0	0	3.17104	51.636
AO090005000150	62.0275	109.626	88.2404	0	54.2667
AO090005000149	0	0	0	0	7.10783
AO090005000148	0	0	0	0	0
AO090005000147	0	0	0	0	0
AO090005000146	0	0	0	0	0
AO090005000145	0	0	0	0	0
AO090005000144	0	0	0	0	0
AO090005000143	0	0.264429	0.0886223	0	0
AO090005000142	64.4137	63.1243	82.2902	67.5736	108.002
AO090005000141	0	11.9851	0	0	0
AO090005000139	0	0	0	0	0
AO090005000138	0	0	0	0	33.8668
AO090005000137	0	93.4125	0	0	90.8506
AO090005000136	8.59047	0.527202	0.160787	0.178613	23.1739
AO090005000135	274.427	147.326	97.1256	182.667	995.826
AO090005000134	1.06582	19.2838	5.44353	0	5.00251
AO090005000133	0	0	0	0	0
AO090005000132	93.4493	45.5163	0	60.0841	0
AO090005000131	0	7.538	88.3633	57.0789	0.728472
AO090005000130	0	47.1329	54.4411	34.3641	0
AO090005000129	124.776	243.847	185.015	99.2766	164.245
AO090005000128	122.859	326.776	291.451	130.001	78.9893
AO090005000127	23.8451	11.2621	91.5341	30.9652	36.3117
AO090005000126	0	0	0	0	0
AO090005t00003	0	0	0	0	0
AO090005000125	0	0	0	0	0
AO090005000123	0	0	0	0	0
AO090005000122	0	0	1.59343	0	0
AO090005000121	0	0	0	0	0
AO090005000120	3.79093	0.0231242	0	1.37101	0
AO090005000119	0	0	0	0	0
AO090005000118	0	0	0	0	0
AO090005000117	53.706	122.039	0.0289855	27.0471	0
AO090005000116	0	3.05093	59.2902	0	0.200454
AO090005000115	35.1218	6.5568	33.6443	105.424	146.966
AO090005000114	0	0	0	1036.6	775.22
AO090005000111	0	0	55.0558	139.187	155.233
AO090005000110	25.6362	102.948	150.001	142.259	147.705
AO090005000109	54.4206	0	0.148378	0	76.054
AO090005000108	224.529	191.849	507.09	0	564.298
AO090005000107	220.914	128.724	95.173	146.45	115.565
AO090005001653	106.263	43.1145	0.242486	115.387	0
AO090005000104	249.072	450.723	155.525	344.597	358.805
AO090005000103	1.55671	0	0	0	0
AO090005000102	0	0	11.7931	0	0.124953
AO090005000101	0	1.58203	72.0755	0	25.4784
AO090005000100	153.676	547.275	490.773	162.536	161.254
AO090005000099	26.4582	21.8643	45.2709	206.375	34.869
AO090005000098	3.64291	52.283	0	0	0
AO090005000097	0	0	0	0	0
AO090005000096	0	0	0	0	0
AO090005000095	0	0	0	0	0
AO090005000094	0	0	0	0	0
AO090005000093	37.9609	56.678	202.042	48.1312	0.211062
AO090005000092	301.928	174.712	414.545	258.115	386.063
AO090005000091	257.588	208.974	650.047	357.057	382.409
AO090005000090	85.1551	96.828	93.6414	0	0.0560685
AO090005000089	0.225578	0.272446	8.06185	0	0
AO090005000086	61.8689	152.195	184.674	73.1952	113.996
AO090005000085	97.7773	123.659	291.224	313.341	167.768
AO090005000084	0	0	0	0	0
AO090005000083	0.0457085	0	55.4409	0	85.5282
AO090005000082	0	0	0	0	0
AO090005000081	0	0	0	0	0
AO090005000080	0	0	0	0	0
AO090005000079	0	0	0	0	0
AO090005000078	0	0	0	0	0
AO090005000077	0	0	0	0	0
AO090005000076	0	0	0	0	0
AO090005000075	3.03634	0	0	0	0
AO090005000074	570.431	1055.94	1470.15	449.658	632.344
AO090005000073	146.797	8.70565	60.5527	49.0433	0
AO090005000072	17.1362	63.9148	57.8853	97.7226	71.6737
AO090005000071	0	40.6606	33.4405	0	0
AO090005t00002	0	0	0	0	0
AO090005000070	0	0	0	0	0
AO090005000067	0	0	0	0	0
AO090005t00001	0	0	0	0	0
AO090005000065	0	0	0	0	0
AO090005000064	27.9956	0	185.58	0	0
AO090005000063	0	0	1.05565	0	0
AO090005000062	0	10.8078	0	0	0
AO090005000061	0	0	0	0	0
AO090005000060	0	0	0	0	0
AO090005000059	0	43.6243	0	0	0
AO090005000057	0	0	0	0	0
AO090005000056	0	0	0	0	0
AO090005000055	0	0	0	0	0
AO090005000054	0	0	0	0	0
AO090005000053	0	0	0	0	0
AO090005000052	0	0	0	0	0
AO090005000051	0	0	0	0	0
AO090005000050	0	14.5079	0	0	31.5269
[truncated: 10,179 more rows]

## Sheet: Up_Down
		Fungi DB				Fungi DB
Gene ID	logFC>2	Product Description		Gene ID	logFC <-2	Product Description
AO090701000014	2.00008	Ortholog(s) have cytosol localization		AO090701000127	-2.00091	Ortholog(s) have unfolded protein binding activity, role in hyphal growth, mitochondrial respiratory chain complex IV assembly and integral component of mitochondrial inner membrane, plasma membrane localization
AO090701000344	2.00074	Ortholog(s) have nucleoside:proton symporter activity, role in nucleoside transport and endoplasmic reticulum localization		AO090026000450	-2.00221	Ortholog(s) have (S)-2-(5-amino-1-(5-phospho-D-ribosyl)imidazole-4-carboxamido)succinate AMP-lyase (fumarate-forming) activity, N6-(1,2-dicarboxyethyl)AMP AMP-lyase (fumarate-forming) activity
AO090701000381	2.00168	Ortholog(s) have ubiquitin-protein transferase activity, role in protein autoubiquitination, protein import into peroxisome matrix, receptor recycling, protein monoubiquitination and cytosol, nucleus, peroxisome localization		AO090026000794	-2.00401	Ortholog(s) have ferrous iron binding, oxidative DNA demethylase activity, peptidyl-proline dioxygenase activity, poly(A) binding activity
AO090012000801	2.00309	Ortholog(s) have structural constituent of ribosome activity		AO090003001117	-2.00496	Ortholog(s) have role in regulation of mitotic sister chromatid segregation and cytosol, nuclear pericentric heterochromatin localization
AO090005000622	2.00573	Has domain(s) with predicted DNA binding, RNA polymerase II transcription factor activity, sequence-specific DNA binding, zinc ion binding activity and role in regulation of transcription, DNA-templated, transcription, DNA-templated		AO090003001143	-2.00754	Has domain(s) with predicted oxidoreductase activity and role in oxidation-reduction process
AO090003000397	2.01853	Ortholog of A. nidulans FGSC A4 : AN3716, A. fumigatus Af293 : Afu6g12770, A. niger CBS 513.88 : An08g10710, Aspergillus wentii : Aspwe1_0102826 and Aspergillus sydowii : Aspsy1_0032599		AO090102000258	-2.00778	Ortholog of A. nidulans FGSC A4 : AN2473, A. fumigatus Af293 : Afu4g03090, A. niger CBS 513.88 : An16g01740, An14g02280 and A. oryzae RIB40 : AO090003001331
AO090038000249	2.01928	Ortholog(s) have cytosolic large ribosomal subunit, preribosome, large subunit precursor localization		AO090206000077	-2.00781	Has domain(s) with predicted role in phosphatidylinositol phosphorylation
AO090011000498	2.02043	Ortholog(s) have sterol 3-beta-glucosyltransferase activity, role in ascospore-type prospore membrane assembly, sterol metabolic process and cytoplasm localization		AO090701000211	-2.00886	Ortholog(s) have eukaryotic translation initiation factor 2alpha kinase activity, tRNA binding activity
AO090012000600	2.02787	Ortholog(s) have GTP binding, GTPase activity, signal transducer activity		AO090026000183	-2.01438	Ortholog of A. nidulans FGSC A4 : AN6548, AN7925, A. fumigatus Af293 : Afu6g04800, A. niger CBS 513.88 : An08g01020, An16g02880, An15g00500 and A. oryzae RIB40 : AO090701000059
AO090005000590	2.03128	Ortholog(s) have protein serine/threonine phosphatase activity		AO090026000842	-2.01445	Cytochrome P450 monooxygenase
AO090020000564	2.03224	Ortholog(s) have intracellular localization		AO090001000491	-2.01541	Ortholog(s) have sequence-specific DNA binding activity
AO090026000605	2.03686	V-SNARE		AO090012000301	-2.01581	Ortholog of A. nidulans FGSC A4 : AN7587, A. fumigatus Af293 : Afu2g15180, A. niger CBS 513.88 : An09g03440, Aspergillus wentii : Aspwe1_0054076 and Aspergillus sydowii : Aspsy1_0058595
AO090001000734	2.05177	Ortholog(s) have L-amino acid transmembrane transporter activity, role in L-alpha-amino acid transmembrane transport, amino acid transmembrane export from vacuole and integral component of fungal-type vacuolar membrane localization		AO090003000121	-2.01805	Ortholog(s) have NADP binding, phosphogluconate dehydrogenase (decarboxylating) activity, role in pentose-phosphate shunt, oxidative branch and cytosol, peroxisome, plasma membrane localization
AO090120000412	2.06359	Ortholog(s) have structural constituent of ribosome activity and mitochondrial large ribosomal subunit localization		AO090003000468	-2.02644	Ortholog(s) have role in cellular response to drug
AO090026000547	2.06503	Ortholog(s) have nucleus localization		AO090001000486	-2.02732	Putative G-protein coupled receptor
AO090005001198	2.06809	Ortholog of A. nidulans FGSC A4 : AN3519, AN2646, AN0587, AN0866, AN7370 and A. fumigatus Af293 : Afu1g15200, Afu3g03790, Afu4g14040, Afu5g06900, Afu7g08575		AO090009000445	-2.0277	Ortholog of A. nidulans FGSC A4 : AN3671, A. niger CBS 513.88 : An01g07770, Aspergillus wentii : Aspwe1_0178345, Aspergillus sydowii : Aspsy1_0154302 and Aspergillus terreus NIH2624 : ATET_03123
AO090005000411	2.07424	Ortholog(s) have nucleolus localization		AO090038000452	-2.0283	Ortholog(s) have role in ribosome biogenesis and cytosol, ribosome localization
AO090120000439	2.07481	Ortholog(s) have ubiquitin binding activity, role in mitochondrial fission, mitochondrial genome maintenance, peroxisome fission and mitochondrial outer membrane localization		AO090012001011	-2.03348	Ortholog(s) have centromeric DNA binding activity
AO090020000304	2.09616	Has domain(s) with predicted nucleic acid binding, nucleotide binding activity		AO090701000290	-2.03467	Ortholog of A. nidulans FGSC A4 : AN10975, A. fumigatus Af293 : Afu5g06970, A. niger CBS 513.88 : An17g00170, Aspergillus versicolor : Aspve1_0135244 and Aspergillus clavatus NRRL 1 : ACLA_010110
AO090026000330	2.1159	Ortholog(s) have cytosol, nucleus localization		AO090010000210	-2.03568	Ortholog of A. fumigatus Af293 : Afu7g01340, A. niger CBS 513.88 : An12g01540, Aspergillus wentii : Aspwe1_0052700 and Aspergillus terreus NIH2624 : ATET_08683
AO090003000583	2.12081	Ortholog(s) have GTPase activity		AO090701000685	-2.03684	Ortholog(s) have drug binding, squalene monooxygenase activity
AO090038000529	2.12222	Ortholog of A. nidulans FGSC A4 : AN11181, A. fumigatus Af293 : Afu7g01600, A. niger CBS 513.88 : An12g01100, Neosartorya fischeri NRRL 181 : NFIA_114300 and Aspergillus clavatus NRRL 1 : ACLA_065970		AO090005000765	-2.04336	Ortholog(s) have transcription regulatory region DNA binding activity, role in cellular response to nitrogen starvation, cleistothecium development, conidium formation, positive regulation of conidium formation and nucleus localization
AO090011000642	2.12819	Ortholog(s) have medium-chain fatty acid-CoA ligase activity, myristoyl-CoA ligase activity, oleoyl-CoA ligase activity, palmitoyl-CoA ligase activity		AO090023000696	-2.0462	Ortholog of S. cerevisiae : YBR053C, A. nidulans FGSC A4 : AN1688, A. fumigatus Af293 : Afu4g08610, A. niger CBS 513.88 : An04g03420 and Aspergillus wentii : Aspwe1_0034438
AO090009000643	2.13264	Ortholog(s) have histone acetyltransferase activity, role in regulation of transcription from RNA polymerase II promoter, tRNA wobble uridine modification and Elongator holoenzyme complex, cytosol, nucleus localization		AO090009000700	-2.05766	Ortholog(s) have role in cellular bud site selection, mRNA splicing, via spliceosome and U2 snRNP, U2-type spliceosomal complex localization
AO090020000053	2.13386	Ortholog(s) have nucleolus, preribosome localization		AO090003000592	-2.0603	Has domain(s) with predicted RNA binding activity and role in RNA processing
AO090005001154	2.15026	Ortholog(s) have fungal-type vacuole membrane localization		AO090001000601	-2.06037	Ortholog(s) have cytosol localization
AO090012000212	2.15437	Has domain(s) with predicted oxidoreductase activity and role in metabolic process		AO090001000344	-2.06775	Ortholog(s) have unfolded protein binding activity
AO090003001329	2.1572	Has domain(s) with predicted sequence-specific DNA binding, transcription factor activity, sequence-specific DNA binding activity, role in regulation of transcription, DNA-templated and nucleus localization		AO090701000173	-2.07179	Ortholog(s) have amidophosphoribosyltransferase activity, role in 'de novo' IMP biosynthetic process, adenine metabolic process and cytoplasm localization
AO090023000752	2.15908	Ortholog(s) have nucleolus localization		AO090026000165	-2.07615	Ortholog(s) have 1-acylglycerophosphocholine O-acyltransferase activity
AO090003000106	2.16223	Ortholog(s) have rDNA binding activity, role in transcription of nuclear large rRNA transcript from RNA polymerase I promoter and cytosol, nucleolus localization		AO090003000746	-2.08602	Ortholog(s) have phosphoglucomutase activity
AO090005001486	2.16392	Ortholog of A. nidulans FGSC A4 : AN2953, A. fumigatus Af293 : Afu3g07890, A. niger CBS 513.88 : An02g11360, Aspergillus wentii : Aspwe1_0041944 and Aspergillus sydowii : Aspsy1_0056308		AO090102000503	-2.08884	Has domain(s) with predicted DNA binding, RNA polymerase II transcription factor activity, sequence-specific DNA binding, zinc ion binding activity and role in regulation of transcription, DNA-templated, transcription, DNA-templated
AO090701000382	2.16437	Ortholog of A. nidulans FGSC A4 : AN3310, AN1449, AN7654, A. fumigatus Af293 : Afu2g01140, Afu3g00880, Afu8g04370 and A. niger CBS 513.88 : An15g07790, An10g00430		AO090003000888	-2.0891	Ortholog(s) have intracellular localization
AO090005001557	2.1655	Ortholog(s) have cytosol localization		AO090001000471	-2.09096	Ortholog(s) have chaperonin-containing T-complex, nucleus localization
AO090003000046	2.16568	Ortholog of A. nidulans FGSC A4 : AN5761, A. fumigatus Af293 : Afu6g06700, A. niger CBS 513.88 : An18g06350, Aspergillus wentii : Aspwe1_0108960 and Aspergillus sydowii : Aspsy1_0148697		AO090020000583	-2.09168	Ortholog(s) have unfolded protein binding activity
AO090005000837	2.17482	Has domain(s) with predicted hydrolase activity and role in metabolic process		AO090005001284	-2.09688	Ortholog(s) have Golgi apparatus localization
AO090009000287	2.18225	Ortholog(s) have role in mitotic spindle elongation, vesicle-mediated transport and integral component of Golgi membrane localization		AO090038000399	-2.09912	Ortholog(s) have iron ion binding activity
AO090012000915	2.18613	Ortholog(s) have role in dynein-driven meiotic oscillatory nuclear movement, karyogamy involved in conjugation with cellular fusion, regulation of mitotic attachment of spindle microtubules to kinetochore		AO090001000604	-2.09955	Ortholog(s) have glucan exo-1,3-beta-glucosidase activity and role in fungal-type cell wall beta-glucan biosynthetic process, glucan catabolic process, regulation of cell shape
AO090005000623	2.18797	Ortholog(s) have peroxisome matrix targeting signal-1 binding, protein binding, bridging activity and role in fatty acid beta-oxidation, penicillin biosynthetic process, protein import into peroxisome matrix, docking		AO090012000900	-2.10027	Ortholog of A. nidulans FGSC A4 : AN0788 and A. niger CBS 513.88 : An09g02430, An03g05960, An09g00710, An09g00820, An09g01710
AO090023000758	2.20169	Ortholog(s) have role in mitochondrial translation and mitochondrion localization		AO090003000807	-2.10149	Ortholog(s) have mRNA binding activity and role in poly(A)+ mRNA export from nucleus, ribosomal large subunit export from nucleus, ribosomal small subunit export from nucleus
AO090020000107	2.20312	Ortholog(s) have role in vesicle-mediated transport and cell division site, cell tip localization		AO090012000727	-2.10279	Ortholog(s) have DNA replication origin binding, chromatin binding, single-stranded DNA binding, single-stranded DNA-dependent ATP-dependent DNA helicase activity
AO090003001141	2.20922	Has domain(s) with predicted structural constituent of ribosome activity, role in translation and ribosome localization		AO090120000112	-2.10378	Ortholog(s) have IgE binding, thioredoxin peroxidase activity and extracellular region, peroxisome localization
AO090009000610	2.21351	Ortholog(s) have MAP kinase kinase kinase activity, MAP kinase kinase kinase kinase activity, SAM domain binding activity		AO090005000641	-2.10519	Has domain(s) with predicted nucleic acid binding activity
AO090012000181	2.21536	Has domain(s) with predicted DNA binding, DNA-directed RNA polymerase activity, role in transcription from RNA polymerase III promoter and DNA-directed RNA polymerase III complex localization		AO090026000164	-2.10756	Ortholog of A. nidulans FGSC A4 : AN11858, A. fumigatus Af293 : Afu2g13970, Neosartorya fischeri NRRL 181 : NFIA_089160, Aspergillus wentii : Aspwe1_0119587 and Aspergillus clavatus NRRL 1 : ACLA_073640
AO090005001609	2.21564	Has domain(s) with predicted role in histone modification, transcription elongation from RNA polymerase II promoter and Cdc73/Paf1 complex localization		AO090120000129	-2.10783	Ortholog(s) have ubiquitin conjugating enzyme activity, ubiquitin-protein transferase activity and role in UV-damage excision repair, free ubiquitin chain polymerization, postreplication repair, protein K63-linked ubiquitination
AO090005000258	2.22016	Has domain(s) with predicted ATP binding, DNA binding, helicase activity, nucleic acid binding, zinc ion binding activity		AO090009000328	-2.10827	Member of the RGS (regulator of G-protein signaling) family
AO090009000474	2.22262	Ortholog(s) have role in apical protein localization, regulation of cell shape and cell septum, plasma membrane of cell tip, spitzenkorper localization		AO090120000210	-2.10847	Ortholog(s) have serine O-acetyltransferase activity, role in cysteine biosynthetic process and mitochondrion localization
AO090701000730	2.22778	Ortholog(s) have P-P-bond-hydrolysis-driven protein transmembrane transporter activity, peptide transporter activity, signal sequence binding activity		AO090003001146	-2.11068	Ortholog(s) have 2 iron, 2 sulfur cluster binding activity and role in cellular iron ion homeostasis, iron-sulfur cluster assembly, protein maturation by iron-sulfur cluster transfer, sulfur compound metabolic process
AO090102000645	2.22976	Ortholog(s) have role in ascospore formation and membrane, mitochondrion localization		AO090020000340	-2.1155	Ortholog of A. nidulans FGSC A4 : AN12223, A. fumigatus Af293 : Afu3g06597, Neosartorya fischeri NRRL 181 : NFIA_070660, Aspergillus versicolor : Aspve1_0040154 and Aspergillus sydowii : Aspsy1_0043228
AO090206000002	2.23578	Ortholog(s) have mitochondrial outer membrane localization		AO090701000588	-2.11768	Ortholog(s) have role in regulation of mitotic cell cycle and cytosol, nucleus localization
AO090011000937	2.23849	Ortholog(s) have protein serine/threonine kinase activity		AO090005000115	-2.12706	Ortholog(s) have role in establishment or maintenance of actin cytoskeleton polarity and cell cortex of cell tip, medial cortex localization
AO090005001585	2.24399	Has domain(s) with predicted nucleic acid binding activity		AO090003001209	-2.13158	Alpha-glucosidase with a role in hydrolysis of alpha-glucose from non-reducing ends of malto-oligosaccharides
AO090020000326	2.25409	Ortholog of A. nidulans FGSC A4 : AN4784, A. fumigatus Af293 : Afu3g06710, Aspergillus wentii : Aspwe1_0173594, Aspergillus sydowii : Aspsy1_0056625 and Aspergillus terreus NIH2624 : ATET_08749		AO090023000652	-2.13631	Ortholog(s) have protein disulfide oxidoreductase activity, role in protein denaturation involved in proteasomal ubiquitin-dependent protein catabolic process and cytosol, nuclear periphery localization
AO090012000317	2.25506	Ortholog(s) have intracellular localization		AO090012000444	-2.13796	Ortholog(s) have tRNA (cytosine-5-)-methyltransferase activity, tRNA binding activity, role in cellular response to hydrogen peroxide, wobble base cytosine methylation and nucleus localization
AO090026000532	2.2746	Putative regulator of G-protein signaling protein		AO090120000256	-2.1386	Ortholog(s) have ATPase inhibitor activity, role in negative regulation of ATPase activity and mitochondrion localization
AO090102000606	2.27528	Has domain(s) with predicted structural constituent of ribosome activity, role in translation and ribosome localization		AO090026000745	-2.14297	Ortholog(s) have pantoate-beta-alanine ligase activity, role in pantothenate biosynthetic process and cytosol, nucleus localization
AO090026000516	2.27585	Putative phosphatidylglycerolphosphatidylinositol transfer protein (PGPI-TP)		AO090009000148	-2.14602	Aspartic-type endopeptidase
AO090026000636	2.27675	Ortholog of A. nidulans FGSC A4 : AN4534, A. fumigatus Af293 : Afu2g02870, A. niger CBS 513.88 : An07g07250, Aspergillus wentii : Aspwe1_0103173 and Aspergillus sydowii : Aspsy1_0059259		AO090001000722	-2.15607	Ortholog(s) have role in mRNA cis splicing, via spliceosome and U4/U6 x U5 tri-snRNP complex localization
AO090026000503	2.28644	Has domain(s) with predicted methyltransferase activity		AO090023000411	-2.1581	Has domain(s) with predicted ammonium transmembrane transporter activity, role in ammonium transport and membrane localization
AO090120000168	2.2866	Ortholog of A. nidulans FGSC A4 : AN11115, A. fumigatus Af293 : Afu6g02740, A. niger CBS 513.88 : An12g08340, Neosartorya fischeri NRRL 181 : NFIA_049060 and Aspergillus clavatus NRRL 1 : ACLA_097700		AO090011000347	-2.15954	Has domain(s) with predicted serine-type peptidase activity and role in proteolysis
AO090103000384	2.29836	Ortholog(s) have fungal-type cell wall localization		AO090120000234	-2.16006	Has domain(s) with predicted role in transmembrane transport and integral component of membrane localization
AO090124000046	2.29989	Has domain(s) with predicted phosphatase activity and role in metabolic process		AO090011000951	-2.16717	Ortholog(s) have actin filament binding, protein binding, bridging activity
AO090206000065	2.29989	protein of unknown function		AO090012001019	-2.17522	Ortholog(s) have role in macroautophagy and Golgi apparatus, endoplasmic reticulum, pre-autophagosomal structure localization
AO090023000817	2.30064	Ortholog(s) have GTP binding, tRNA binding, translation initiation factor activity, translation initiation factor binding activity		AO090020000205	-2.18213	Ortholog(s) have pantothenate kinase activity, role in coenzyme A biosynthetic process and cytosol, nucleus localization
AO090005000416	2.30496	Ortholog(s) have RSC complex, SWI/SNF complex, cytoplasm localization		AO090026000364	-2.18755	Has domain(s) with predicted 4-alpha-hydroxytetrahydrobiopterin dehydratase activity and role in tetrahydrobiopterin biosynthetic process
AO090009000320	2.3167	ubiquitin-specific protease		AO090005001312	-2.20267	Has domain(s) with predicted catalytic activity and role in metabolic process
AO090038000233	2.32588	Putative maltose permease, MFS superfamily		AO090120000364	-2.20398	Ortholog(s) have mitochondrion localization
AO090009000333	2.3346	Ortholog(s) have role in purine nucleobase metabolic process and cytosol localization		AO090026000707	-2.20472	Ortholog of A. nidulans FGSC A4 : AN0168, A. fumigatus Af293 : Afu5g11330, A. niger CBS 513.88 : An01g02510, Aspergillus wentii : Aspwe1_0075145 and Aspergillus sydowii : Aspsy1_0027709
AO090005001490	2.3448	Ortholog(s) have UDP-N-acetylglucosamine 4-epimerase activity, UDP-glucose 4-epimerase activity and role in galactose metabolic process		AO090005001346	-2.20915	Ortholog of A. nidulans FGSC A4 : AN3022, A. fumigatus Af293 : Afu3g08900, A. niger CBS 513.88 : An16g02430, Aspergillus wentii : Aspwe1_0041802 and Aspergillus sydowii : Aspsy1_0042503
AO090038000296	2.36285	Has domain(s) with predicted cytoplasm, nucleus localization		AO090003000834	-2.213	Ortholog of A. nidulans FGSC A4 : AN0406, A. fumigatus Af293 : Afu1g04990, A. niger CBS 513.88 : An01g04080, Aspergillus wentii : Aspwe1_0104266 and Aspergillus sydowii : Aspsy1_0639570
AO090103000017	2.36474	Putative protein factor similar to Yhh1p involved in pre-mRNA 3&#8242		AO090026000614	-2.21418	Ortholog(s) have role in positive regulation of transcription from RNA polymerase II promoter involved in cellular response to chemical stimulus and cytosol, nucleus localization
AO090009000307	2.37041	Ortholog(s) have role in carbon utilization		AO090005001649	-2.2156	Ortholog of A. niger CBS 513.88 : An08g00080, Aspergillus wentii : Aspwe1_0094891, Aspergillus versicolor : Aspve1_0024644 and Aspergillus clavatus NRRL 1 : ACLA_026790
AO090020000146	2.37613	Ortholog of A. fumigatus Af293 : Afu3g07490, Aspergillus glaucus : Aspgl1_0047192, Aspergillus flavus NRRL 3357 : AFL2T_11136 and Neosartorya fischeri NRRL 181 : NFIA_069690		AO090038000610	-2.21944	Ortholog(s) have adenine phosphoribosyltransferase activity, role in AMP salvage, adenine salvage and cytosol, nucleus localization
AO090701000389	2.37673	Ortholog(s) have 1,3-beta-glucanosyltransferase activity		AO090003000444	-2.23013	Putative adenine deaminase/adenosine deaminase
AO090001000524	2.37863	Ortholog(s) have role in cristae formation and MICOS complex, mitochondrial crista junction localization		AO090026000437	-2.23309	Ortholog(s) have copper uptake transmembrane transporter activity, inorganic phosphate transmembrane transporter activity
AO090009000691	2.3854	Centromere/microtubule binding protein		AO090102000368	-2.23514	Has domain(s) with predicted ribokinase activity and role in D-ribose metabolic process
AO090003000691	2.38772	Ortholog(s) have role in regulation of transcription from RNA polymerase II promoter and SWI/SNF complex, mitotic spindle pole body localization		AO090003001574	-2.23553	Has domain(s) with predicted RNA polymerase II transcription factor activity, sequence-specific DNA binding, zinc ion binding activity, role in regulation of transcription, DNA-templated and nucleus localization
AO090120000479	2.40846	Ortholog(s) have magnesium-dependent protein serine/threonine phosphatase activity and role in inactivation of MAPK activity involved in osmosensory signaling pathway, peptidyl-serine dephosphorylation, peptidyl-threonine dephosphorylation		AO090102000157	-2.24204	Ortholog(s) have tRNA adenylyltransferase activity, role in tRNA 3'-terminal CCA addition and cytosol, mitochondrial matrix localization
AO090009000598	2.40976	Has domain(s) with predicted ATP binding, protein kinase activity, protein tyrosine kinase activity and role in protein phosphorylation		AO090009000707	-2.24482	Ortholog(s) have actin filament binding, calmodulin binding, microfilament motor activity
AO090005001021	2.41415	Has domain(s) with predicted integral component of membrane localization		AO090020000038	-2.24683	Ortholog(s) have role in transport and endoplasmic reticulum, integral component of Golgi membrane localization
AO090010000312	2.41537	Ortholog(s) have cytosol, nucleus localization		AO090005000430	-2.25007	Ortholog(s) have cytosol, nucleus localization
AO090020000576	2.42318	Ortholog(s) have mitochondrial ribosome localization		AO090038000625	-2.25103	Ortholog(s) have protein domain specific binding activity, role in mitochondrial proton-transporting ATP synthase complex assembly and mitochondrion localization
AO090023000128	2.44633	Has domain(s) with predicted ATP binding, protein kinase activity, protein tyrosine kinase activity and role in protein phosphorylation		AO090003000545	-2.25444	Ortholog(s) have mitochondrion localization
AO090005001297	2.46258	Ortholog(s) have role in establishment of cell polarity, establishment of nucleus localization, microtubule nucleation by spindle pole body and nucleus localization		AO090005000272	-2.25753	Ortholog(s) have serine-type endopeptidase activity, role in mitochondrial tRNA threonylcarbamoyladenosine modification, proteolysis, tRNA threonylcarbamoyladenosine modification and mitochondrion localization
AO090026000840	2.46347	Ortholog(s) have 1-phosphatidylinositol 4-kinase activity, role in establishment or maintenance of cell polarity, invasive filamentous growth, phosphatidylinositol phosphorylation and cytosol, mitochondrion, plasma membrane localization		AO090020000555	-2.28507	Ortholog of A. nidulans FGSC A4 : AN9481, A. fumigatus Af293 : Afu5g09380, Aspergillus wentii : Aspwe1_0101458, Aspergillus sydowii : Aspsy1_0093275 and Aspergillus terreus NIH2624 : ATET_06513
AO090020000522	2.46603	Ortholog(s) have cytosol localization		AO090001000153	-2.28507	Has domain(s) with predicted oxidoreductase activity and role in oxidation-reduction process
AO090012000690	2.46754	Ortholog(s) have acylglycerone-phosphate reductase activity, triglyceride lipase activity and role in phosphatidic acid biosynthetic process, triglyceride catabolic process		AO090701000837	-2.28507	Has domain(s) with predicted carbon-sulfur lyase activity and role in metabolic process
AO090023000494	2.47238	Ortholog of A. nidulans FGSC A4 : AN0575, A. fumigatus Af293 : Afu6g11200, Aspergillus wentii : Aspwe1_0108297, Aspergillus sydowii : Aspsy1_0144497 and Aspergillus terreus NIH2624 : ATET_05047		AO090003000305	-2.2874	Ortholog of A. nidulans FGSC A4 : AN10264, Aspergillus wentii : Aspwe1_0046218, Aspergillus versicolor : Aspve1_0080260, Aspergillus clavatus NRRL 1 : ACLA_089630 and Aspergillus zonatus : Aspzo1_0110293
AO090020000028	2.47295	Ortholog(s) have cytosol localization		AO090010000458	-2.29083	Ortholog(s) have U2-type spliceosomal complex localization
AO090009000568	2.47349	Ortholog(s) have 2-methylcitrate synthase activity, citrate (Si)-synthase activity and role in propionate catabolic process, 2-methylcitrate cycle, propionate metabolic process, methylcitrate cycle, sterigmatocystin biosynthetic process		AO090020000051	-2.29528	Ortholog of A. nidulans FGSC A4 : AN10409, A. fumigatus Af293 : Afu3g05830, A. niger CBS 513.88 : An11g10770, Aspergillus wentii : Aspwe1_0029425 and Aspergillus sydowii : Aspsy1_0030109
AO090023000629	2.47466	Ortholog(s) have dolichyl-phosphate-mannose-glycolipid alpha-mannosyltransferase activity, glutathione binding activity, role in GPI anchor biosynthetic process and endoplasmic reticulum localization		AO090124000078	-2.3045	Ortholog(s) have endoplasmic reticulum, extracellular region localization
AO090026000772	2.4802	Ortholog of A. niger CBS 513.88 : An12g07470, Neosartorya fischeri NRRL 181 : NFIA_049400, Aspergillus wentii : Aspwe1_0168197 and Aspergillus clavatus NRRL 1 : ACLA_097350		AO090120000166	-2.30791	Has domain(s) with predicted role in transmembrane transport and integral component of membrane localization
AO090003000066	2.48763	Member of the RGS (regulator of G-protein signaling) family		AO090102000389	-2.3093	Ortholog(s) have phosphoribosylformylglycinamidine synthase activity, role in purine nucleotide biosynthetic process and Golgi apparatus localization
AO090009000291	2.48945	Subtilisin-like processing protease		AO090005000162	-2.31425	Ortholog(s) have protein disulfide isomerase activity, thiol oxidase activity, role in oxidation-reduction process and integral component of endoplasmic reticulum membrane localization
AO090026000655	2.49533	Ortholog(s) have role in intein-mediated protein splicing, spliceosomal conformational changes to generate catalytic conformation and Prp19 complex, U5 snRNP, spliceosomal complex localization		AO090023000395	-2.31466	Ortholog(s) have argininosuccinate synthase activity, role in arginine biosynthetic process and cytosol localization
AO090701000786	2.49894	Ortholog of A. fumigatus Af293 : Afu2g01620, A. niger CBS 513.88 : An03g04820, Neosartorya fischeri NRRL 181 : NFIA_033930 and Aspergillus wentii : Aspwe1_0041654		AO090005000405	-2.31814	protein of unknown function
AO090005001248	2.50019	Ortholog(s) have butyryl-CoA dehydrogenase activity and role in fatty acid beta-oxidation using acyl-CoA dehydrogenase		AO090012000279	-2.32035	Has domain(s) with predicted FAD binding, oxidoreductase activity and role in metabolic process
AO090038000564	2.5057	Ortholog(s) have histone acetyltransferase activity, methylated histone binding activity		AO090005001105	-2.32456	Ortholog(s) have cytosol, nuclear envelope, nuclear periphery localization
AO090023000831	2.51582	Ortholog(s) have endopeptidase activator activity and role in proteasomal ubiquitin-independent protein catabolic process, proteasome-mediated ubiquitin-dependent protein catabolic process		AO090020000003	-2.3246	Ortholog(s) have ATPase activator activity and role in endocytosis, rRNA processing, regulation of cell size, ribosomal large subunit biogenesis, ribosomal large subunit export from nucleus
AO090001000550	2.52441	Ortholog(s) have mitochondrion localization		AO090023000723	-2.33177	Ortholog(s) have role in cellular protein localization and cytosol, mediator complex localization
AO090701000589	2.53757	Chitin synthase		AO090023000140	-2.34493	Ortholog(s) have FAD binding, sulfide:quinone oxidoreductase activity
AO090011000717	2.55168	Ortholog of A. nidulans FGSC A4 : AN6059, A. fumigatus Af293 : Afu2g09470, A. niger CBS 513.88 : An16g06820, Aspergillus wentii : Aspwe1_0054380 and Aspergillus sydowii : Aspsy1_0045140		AO090701000377	-2.34494	Ortholog of A. nidulans FGSC A4 : AN7651, A. fumigatus Af293 : Afu2g01080, A. niger CBS 513.88 : An10g00470, Aspergillus wentii : Aspwe1_0113772 and Aspergillus sydowii : Aspsy1_1029216
AO090012000418	2.57073	Ortholog(s) have stretch-activated, cation-selective, calcium channel activity, role in calcium ion transmembrane transport, cell volume homeostasis, cellular calcium ion homeostasis and perinuclear endoplasmic reticulum localization		AO090102000252	-2.34863	Ortholog(s) have L-lactate dehydrogenase (cytochrome) activity, role in lactate metabolic process and glyoxysome, mitochondrial intermembrane space localization
AO090003000005	2.57713	Ortholog(s) have mRNA binding activity and role in establishment of cell polarity, proteasomal ubiquitin-independent protein catabolic process, proteasome-mediated ubiquitin-dependent protein catabolic process		AO090023000962	-2.35583	Ortholog(s) have sphingosine N-acyltransferase activity and role in filamentous growth of a population of unicellular organisms, glycosylceramide biosynthetic process, unidimensional cell growth, vacuolar acidification
AO090023000127	2.58063	Dihydroxy-acid dehydratase		AO090005000432	-2.36153	Ortholog(s) have ribose phosphate diphosphokinase activity and role in 5-phosphoribose 1-diphosphate biosynthetic process, cytokinesis, fungal-type cell wall organization
AO090003001090	2.5829	Ortholog(s) have proton-transporting ATPase activity, rotational mechanism activity and role in endocytosis, polyphosphate metabolic process, protein complex assembly, proton transport, vacuolar acidification, vacuole organization		AO090005000872	-2.3621	Ortholog of A. nidulans FGSC A4 : AN0339, A. fumigatus Af293 : Afu1g02280, A. niger CBS 513.88 : An01g05970, Aspergillus wentii : Aspwe1_0049720 and Aspergillus sydowii : Aspsy1_0040896
AO090005001593	2.5846	protein of unknown function		AO090124000021	-2.36599	Has domain(s) with predicted role in transmembrane transport and integral component of membrane localization
AO090003000890	2.5894	protein of unknown function		AO090010000764	-2.36932	Ortholog(s) have mitochondrion, ribosome localization
AO090206000016	2.59871	Ortholog(s) have MAP kinase tyrosine phosphatase activity		AO090011000595	-2.37373	Ortholog(s) have prephenate dehydrogenase (NADP+) activity, role in tyrosine biosynthetic process and cytosol localization
AO090005001471	2.59891	Ortholog(s) have role in maturation of 5.8S rRNA from tricistronic rRNA transcript (SSU-rRNA, 5.8S rRNA, LSU-rRNA), maturation of LSU-rRNA from tricistronic rRNA transcript (SSU-rRNA, 5.8S rRNA, LSU-rRNA)		AO090005001280	-2.37622	Ortholog(s) have fungal-type cell wall localization
AO090005001114	2.59993	Ortholog(s) have role in ER to Golgi vesicle-mediated transport, Golgi inheritance, Golgi localization, retrograde vesicle-mediated transport, Golgi to ER and COPI vesicle coat localization		AO090701000471	-2.3778	protein of unknown function
AO090026000262	2.6057	Ortholog of A. nidulans FGSC A4 : AN6328, A. fumigatus Af293 : Afu2g13512, A. niger CBS 513.88 : An02g05750, Aspergillus wentii : Aspwe1_0163563 and Aspergillus sydowii : Aspsy1_0997059		AO090005001176	-2.38485	Ortholog(s) have cytosol, nucleus localization
AO090102000239	2.60768	Ortholog(s) have Ras guanyl-nucleotide exchange factor activity		AO090701000013	-2.38761	Ortholog(s) have glyoxysome localization
AO090011000318	2.61492	Ortholog(s) have role in protein targeting to mitochondrion and mitochondrial outer membrane, peroxisomal membrane localization		AO090003000324	-2.3944	Ortholog(s) have role in syncytium formation by plasma membrane fusion, vacuolar proton-transporting V-type ATPase complex assembly and integral component of endoplasmic reticulum membrane localization
AO090003000389	2.61583	Ortholog(s) have protein complex scaffold, ubiquitin-specific protease activity and role in RNA splicing, histone H3-K4 methylation, histone H3-K79 methylation, histone deubiquitination		AO090120000411	-2.39639	Ortholog(s) have structural constituent of ribosome activity and mitochondrial large ribosomal subunit localization
AO090023000806	2.6219	Ortholog(s) have IMP cyclohydrolase activity, phosphoribosylaminoimidazolecarboxamide formyltransferase activity, role in 'de novo' IMP biosynthetic process and cytosol, plasma membrane localization		AO090003000285	-2.39774	Ortholog(s) have translation release factor activity, role in cytoplasmic translational termination and cytosolic ribosome, translation release factor complex localization
AO090009000709	2.62349	Ortholog(s) have endoplasmic reticulum localization		AO090026000179	-2.40823	Ortholog of A. nidulans FGSC A4 : AN6380, A. fumigatus Af293 : Afu2g13930, A. niger CBS 513.88 : An02g05120, Neosartorya fischeri NRRL 181 : NFIA_089090 and Aspergillus versicolor : Aspve1_0052622
AO090012000430	2.626	V-SNARE		AO090001000412	-2.41364	Ortholog of A. nidulans FGSC A4 : AN10518, A. fumigatus Af293 : Afu1g06350, A. niger CBS 513.88 : An18g05000, Neosartorya fischeri NRRL 181 : NFIA_018360 and Aspergillus wentii : Aspwe1_0038230
AO090011000807	2.62939	Ortholog(s) have dihydrofolate reductase activity, drug binding, mRNA binding activity, role in dihydrofolate metabolic process, tetrahydrofolate biosynthetic process and mitochondrion localization		AO090010000471	-2.41632	Ortholog(s) have phosphomevalonate kinase activity
AO090120000201	2.6359	Ortholog(s) have role in nuclear migration along microtubule		AO090003001207	-2.41674	Has domain(s) with predicted transferase activity, transferring glycosyl groups activity and membrane localization
AO090005001389	2.64127	Ortholog(s) have steryl-beta-glucosidase activity, role in ergosteryl 3-beta-D-glucoside catabolic process and cytosol localization		AO090011000659	-2.42406	Predicted glucose-6-phosphate isomerase with role in glycolysis
AO090005001002	2.64507	Has domain(s) with predicted role in DNA-templated transcription, initiation and transcription factor TFIID complex localization		AO090206000072	-2.42748	Ortholog of A. nidulans FGSC A4 : AN7025, A. fumigatus Af293 : Afu4g04220, Aspergillus wentii : Aspwe1_0114911, Aspergillus sydowii : Aspsy1_0060635 and Aspergillus terreus NIH2624 : ATET_10114
AO090120000208	2.65331	Ortholog(s) have alpha-1,6-mannosyltransferase activity		AO090102000476	-2.43894	Ortholog(s) have thiamine transmembrane transporter activity, role in thiamine transmembrane transport and endoplasmic reticulum, medial membrane band, plasma membrane of cell tip localization
AO090001000417	2.67532	Ortholog(s) have cytosol, nucleus localization		AO090009000304	-2.44161	Ortholog of A. nidulans FGSC A4 : AN3600, A. fumigatus Af293 : Afu4g12760, A. niger CBS 513.88 : An01g08280, Aspergillus wentii : Aspwe1_0099611 and Aspergillus sydowii : Aspsy1_0032683
AO090102000273	2.69209	Ortholog(s) have role in establishment of cell polarity, proteasomal ubiquitin-independent protein catabolic process, proteasome-mediated ubiquitin-dependent protein catabolic process		AO090001000009	-2.455	Non-ribosomal peptide synthase (NRPS) involved in the synthesis of a dipeptidyl peptidase IV 2 inhibitor
AO090005001282	2.6938	Has domain(s) with predicted RNA polymerase II transcription factor activity, sequence-specific DNA binding, zinc ion binding activity, role in regulation of transcription, DNA-templated and nucleus localization		AO090102000566	-2.45556	Ortholog(s) have cytosol, nucleus localization
AO090012000968	2.69805	Has domain(s) with predicted ubiquitinyl hydrolase activity and role in protein deubiquitination, ubiquitin-dependent protein catabolic process		AO090038000338	-2.45605	Ortholog(s) have glycine dehydrogenase (decarboxylating) activity, role in glycine metabolic process, one-carbon metabolic process and mitochondrion localization
AO090102000276	2.7265	Ortholog(s) have cysteine synthase activity, role in cysteine biosynthetic process from serine and mitochondrion localization		AO090026000551	-2.47298	Ortholog(s) have role in cellular response to drug, chromatin remodeling and Ino80 complex, cytosol localization
AO090009000337	2.72886	Has domain(s) with predicted RNA polymerase II transcription cofactor activity, role in regulation of transcription from RNA polymerase II promoter and mediator complex localization		AO090001000197	-2.47758	Ortholog of A. nidulans FGSC A4 : AN2683, AN5069, A. fumigatus Af293 : Afu5g02860, Afu5g14320, A. niger CBS 513.88 : An09g04830, An14g05730 and A. oryzae RIB40 : AO090102000482
AO090001000100	2.72967	protein of unknown function		AO090026000719	-2.47953	Sequence-specific DNA binding transcription factor
AO090011000706	2.73186	Ortholog(s) have role in cell volume homeostasis, cellular calcium ion homeostasis, regulation of resting membrane potential and cortical endoplasmic reticulum localization		AO090701000169	-2.48552	Ortholog of A. nidulans FGSC A4 : AN2183, A. fumigatus Af293 : Afu6g03800, A. niger CBS 513.88 : An15g01720, Aspergillus wentii : Aspwe1_0035996 and Aspergillus sydowii : Aspsy1_0084971
AO090102000651	2.73668	Ortholog(s) have U2 snRNP localization		AO090012000873	-2.49006	Ortholog(s) have 2',3'-cyclic-nucleotide 3'-phosphodiesterase activity, GTP-dependent polyribonucleotide 5'-hydroxyl-kinase activity, RNA ligase (ATP) activity
AO090020000619	2.74056	Ortholog(s) have cysteine desulfurase activity and role in cellular iron ion homeostasis, iron-sulfur cluster assembly, mitochondrial tRNA thio-modification, tRNA wobble uridine modification		AO090003000394	-2.49271	Ortholog(s) have COPI-coated vesicle, Golgi apparatus, nuclear periphery localization
AO090023000771	2.74186	Ortholog(s) have ornithine decarboxylase activity, role in DNA biosynthetic process, nuclear division, putrescine biosynthetic process, spermidine biosynthetic process, spore germination and cytosol, nucleus localization		AO090001000581	-2.49478	Ortholog of A. nidulans FGSC A4 : AN1773, A. fumigatus Af293 : Afu6g09030, A. niger CBS 513.88 : An11g06790, Aspergillus wentii : Aspwe1_0121600 and Aspergillus sydowii : Aspsy1_0038822
AO090005001133	2.74421	Ortholog(s) have cytoplasm, nuclear envelope, nuclear periphery localization		AO090010000194	-2.51056	Ortholog of A. nidulans FGSC A4 : AN3371, A. fumigatus Af293 : Afu7g01290, A. niger CBS 513.88 : An12g01950, Aspergillus wentii : Aspwe1_0173909 and Aspergillus sydowii : Aspsy1_0147256
AO090005001295	2.74587	Ortholog(s) have role in cellular response to drug and cytoplasm, nucleus localization		AO090026000461	-2.51103	Ortholog of A. nidulans FGSC A4 : AN6201, A. fumigatus Af293 : Afu2g11830, Neosartorya fischeri NRRL 181 : NFIA_087060, Aspergillus wentii : Aspwe1_0175601 and Aspergillus versicolor : Aspve1_0052426
AO090120000042	2.7717	Ortholog(s) have cytosol, nucleus localization		AO090005001315	-2.51261	Has domain(s) with predicted catalytic activity, tryptophan synthase activity and role in tryptophan metabolic process
AO090026000314	2.79293	Ortholog(s) have 1-phosphatidylinositol 4-kinase activity		AO090001000589	-2.51618	Ortholog of A. nidulans FGSC A4 : AN1765, A. fumigatus Af293 : Afu6g09120, Neosartorya fischeri NRRL 181 : NFIA_054800, Aspergillus wentii : Aspwe1_0705131 and Aspergillus clavatus NRRL 1 : ACLA_083280
AO090701000700	2.79748	Ortholog(s) have single-stranded DNA binding activity, role in mitochondrial genome maintenance, positive regulation of mitochondrial DNA replication and mitochondrial nucleoid localization		AO090026000178	-2.51636	Ortholog of A. fumigatus Af293 : Afu2g13940, A. niger CBS 513.88 : An02g05100, Neosartorya fischeri NRRL 181 : NFIA_089100 and Aspergillus wentii : Aspwe1_0045503
AO090005001611	2.80385	Ortholog(s) have large ribosomal subunit rRNA binding activity, role in cellular response to drug, rRNA processing, ribosomal large subunit biogenesis and PeBoW complex, preribosome, large subunit precursor localization		AO090003001484	-2.51934	Putative cell wall protein
AO090001000693	2.80444	Ortholog(s) have GTP binding, GTPase activity		AO090009000422	-2.5363	protein of unknown function
AO090003001155	2.80687	Ortholog(s) have role in cellular response to drug and cytosol, nucleus, small-subunit processome localization		AO090120000079	-2.53855	Ortholog(s) have RNA polymerase III activity and role in tRNA 3'-trailer cleavage, tRNA transcription from RNA polymerase III promoter, termination of RNA polymerase III transcription
AO090001000562	2.80837	Ortholog(s) have cytosol, nucleus localization		AO090005001630	-2.54071	Ortholog of A. nidulans FGSC A4 : AN1383, A. fumigatus Af293 : Afu1g08960, A. niger CBS 513.88 : An08g00450, Aspergillus wentii : Aspwe1_0048794 and Aspergillus sydowii : Aspsy1_0025360
AO090023000745	2.81179	Zinc-binding oxidoreductase		AO090003000253	-2.55015	Cytochrome P450 monooxygenase
AO090009000478	2.83103	Has domain(s) with predicted RNA polymerase II transcription cofactor activity, role in regulation of transcription from RNA polymerase II promoter and mediator complex localization		AO090120000321	-2.55125	Ortholog of A. nidulans FGSC A4 : AN9523, A. fumigatus Af293 : Afu5g12040, A. niger CBS 513.88 : An18g02305, Aspergillus wentii : Aspwe1_0445614 and Aspergillus sydowii : Aspsy1_0054923
AO090003001205	2.83311	Ortholog(s) have role in SRP-dependent cotranslational protein targeting to membrane, translocation and cytosol, nucleus, signal recognition particle, endoplasmic reticulum targeting localization		AO090001000350	-2.5556	Ortholog(s) have ubiquitin protein ligase binding activity and role in endocytosis, positive regulation of ubiquitin-dependent endocytosis, regulation of intracellular transport
AO090009000355	2.83493	Ortholog(s) have endoplasmic reticulum localization		AO090003000365	-2.55612	Ortholog(s) have cytosol, nucleus, site of double-strand break localization
AO090020000592	2.83582	Ortholog(s) have Golgi apparatus localization		AO090138000213	-2.55686	Ortholog(s) have role in negative regulation of gluconeogenesis, proteasome-mediated ubiquitin-dependent protein catabolic process, protein catabolic process in the vacuole, protein targeting to vacuole
AO090005000788	2.84421	protein of unknown function		AO090026000742	-2.55924	Ortholog(s) have transcription factor activity, sequence-specific DNA binding activity and role in positive regulation of transcription from RNA polymerase II promoter, regulation of arginine metabolic process
AO090138000205	2.85541	Ortholog of A. nidulans FGSC A4 : AN6950, Aspergillus flavus NRRL 3357 : AFL2T_08824, Aspergillus zonatus : Aspzo1_0132583 and Aspergillus terreus NIH2624 : ATET_06414		AO090005001239	-2.56605	Ortholog of A. nidulans FGSC A4 : AN0833, A. fumigatus Af293 : Afu1g14930, Aspergillus wentii : Aspwe1_0171773, Aspergillus sydowii : Aspsy1_0139633 and Aspergillus terreus NIH2624 : ATET_00857
AO090038000234	2.86081	Putative maltase		AO090001000680	-2.56648	Ortholog(s) have asparagine-tRNA ligase activity, role in asparaginyl-tRNA aminoacylation and cytosol localization
AO090003001003	2.86177	Ortholog(s) have gluconokinase activity, role in D-gluconate metabolic process and cytosol, nucleus localization		AO090005001210	-2.57112	Has domain(s) with predicted hydrolase activity, acting on carbon-nitrogen (but not peptide) bonds, oxidoreductase activity and role in carbohydrate metabolic process, metabolic process
AO090012000647	2.86467	Ortholog(s) have cytosol, nucleus localization		AO090023000574	-2.57265	Ortholog(s) have rRNA (cytosine-C5-)-methyltransferase activity, role in rRNA base methylation and nucleolus localization
AO090003001027	2.88006	Ortholog(s) have alpha-tubulin binding activity, role in protein folding, tubulin complex assembly and cytosol, nucleus localization		AO090011000965	-2.58073	Has domain(s) with predicted DNA binding, RNA polymerase II transcription factor activity, sequence-specific DNA binding, zinc ion binding activity and role in regulation of transcription, DNA-templated, transcription, DNA-templated
AO090023000939	2.89026	Has domain(s) with predicted zinc ion binding activity		AO090012000415	-2.58516	Ortholog(s) have gamma-butyrobetaine dioxygenase activity, role in carnitine biosynthetic process, mitochondrion organization and mitochondrion localization
AO090023000982	2.89533	Ortholog(s) have RSC complex, cytosol localization		AO090011000795	-2.58804	Ortholog(s) have polyphosphate kinase activity and role in microautophagy, polyphosphate metabolic process, vacuolar transport, vacuole fusion, non-autophagic
AO090026000203	2.90314	Ortholog(s) have U2 snRNP localization		AO090113000083	-2.59174	Ortholog(s) have mRNA binding activity, role in cytoplasmic translation and cytoplasm, polysomal ribosome localization
AO090011000952	2.9163	Has domain(s) with predicted nucleic acid binding, nucleotide binding activity		AO090003000090	-2.59722	Thiamine biosynthetic enzyme
AO090001000752	2.91978	Ortholog(s) have ubiquitin-specific protease activity, role in protein deubiquitination and nucleoplasm localization		AO090010000212	-2.61291	Ortholog(s) have thiosulfate sulfurtransferase activity, role in tRNA wobble position uridine thiolation and mitochondrion localization
AO090120000408	2.92871	Ortholog(s) have cytosol, mitochondrion, nucleus localization		AO090026000730	-2.61544	Ortholog(s) have nucleolus localization
AO090103000053	2.93371	Has domain(s) with predicted nucleic acid binding, zinc ion binding activity		AO090011000202	-2.61973	Flavohemoglobin
AO090120000212	2.94038	Ortholog(s) have role in U1 snRNA 3'-end processing, U4 snRNA 3'-end processing and U5 snRNA 3'-end processing, more		AO090038000607	-2.62251	Ortholog of Aspergillus flavus NRRL 3357 : AFL2T_07932
AO090020000299	2.94375	Ortholog(s) have pyrimidine nucleotide transmembrane transporter activity and role in divalent metal ion transport, mitochondrial genome maintenance, pyrimidine nucleotide transport, transmembrane transport		AO090003000876	-2.62333	Has domain(s) with predicted serine-type peptidase activity and role in proteolysis
AO090026000462	2.9442	Ortholog(s) have mRNA binding activity and 90S preribosome, cytoplasm, mitotic spindle pole body, nucleolus localization		AO090003001118	-2.62487	Ortholog(s) have role in cellular response to drug, filamentous growth, late endosome to vacuole transport via multivesicular body sorting pathway and fungal-type vacuole membrane localization
AO090012000557	2.97018	Ortholog(s) have role in cellular response to UV, regulation of nuclear division and cytosol, nucleus localization		AO090102000445	-2.63033	protein of unknown function
AO090701000108	2.98171	Ortholog(s) have role in mitochondrial tRNA wobble uridine modification and mitochondrion localization		AO090011000341	-2.63037	Ortholog(s) have protein serine/threonine kinase activity, protein tyrosine kinase activity
AO090011000922	3.03508	Has domain(s) with predicted phospholipid binding activity, role in cortical protein anchoring and cell cortex localization		AO090003000729	-2.63252	Ortholog(s) have mRNA binding, saccharopine dehydrogenase (NAD+, L-lysine-forming) activity, role in lysine biosynthetic process via aminoadipic acid and cytoplasm localization
AO090001000477	3.04298	Ortholog of A. nidulans FGSC A4 : AN5714, A. fumigatus Af293 : Afu1g06762, A. niger CBS 513.88 : An18g05800, Aspergillus wentii : Aspwe1_0109415 and Aspergillus sydowii : Aspsy1_0150388		AO090026000607	-2.63603	Ortholog(s) have mitochondrial outer membrane, plasma membrane localization
AO090701000756	3.0555	Ortholog(s) have role in proteasome-mediated ubiquitin-dependent protein catabolic process and cytoplasm, nucleus localization		AO090038000594	-2.64282	Ortholog(s) have role in regulation of cell shape, regulation of phosphorylation of RNA polymerase II C-terminal domain, transcription elongation from RNA polymerase II promoter and mitotic spindle pole body, nuclear chromatin localization
AO090103000410	3.07437	Ortholog(s) have role in endonucleolytic cleavage in 5'-ETS of tricistronic rRNA transcript (SSU-rRNA, 5.8S rRNA and LSU-rRNA), more		AO090011000796	-2.64769	Ortholog(s) have DNA ligase (ATP) activity, role in DNA ligation, DNA repair, Okazaki fragment processing involved in mitotic DNA replication and mitochondrion, nucleus localization
AO090005001224	3.08555	Ortholog(s) have nucleolus localization		AO090023000893	-2.65988	Ortholog(s) have sphingolipid delta-4 desaturase activity, role in cellular response to glucose starvation, hyphal growth, response to heat, sphingosine biosynthetic process and endoplasmic reticulum localization
AO090010000456	3.09206	Ortholog(s) have mRNA binding activity and role in maturation of 5.8S rRNA from tricistronic rRNA transcript (SSU-rRNA, 5.8S rRNA, LSU-rRNA), maturation of LSU-rRNA from tricistronic rRNA transcript (SSU-rRNA, 5.8S rRNA, LSU-rRNA)		AO090020000065	-2.66504	Ortholog(s) have nuclear periphery, spindle pole body localization
AO090103000045	3.10022	Ortholog(s) have chromatin binding, histone binding activity		AO090001000483	-2.66814	Has domain(s) with predicted metal ion binding, oxidoreductase activity and role in oxidation-reduction process
AO090005001448	3.11273	Ortholog(s) have role in activation of anaphase-promoting complex activity and mitotic cell cycle arrest in response to nitrogen starvation, more		AO090103000072	-2.67606	Ortholog(s) have microtubule plus-end binding activity and role in ascospore formation, dynein-driven meiotic oscillatory nuclear movement, syncytium formation by plasma membrane fusion
AO090102000494	3.11703	Ortholog of A. nidulans FGSC A4 : AN8167, A. fumigatus Af293 : Afu5g02950, A. niger CBS 513.88 : An09g05040, Aspergillus wentii : Aspwe1_0030018 and Aspergillus sydowii : Aspsy1_0061808		AO090103000138	-2.68851	Sterol C5 desaturase
AO090023000511	3.11769	Ortholog(s) have nucleus localization		AO090120000155	-2.68858	Ortholog(s) have role in pathogenesis, positive regulation of cleistothecium development, positive regulation of conidiophore development and positive regulation of penicillin metabolic process, more
AO090120000306	3.12295	Ortholog(s) have structural constituent of ribosome activity and mitochondrial large ribosomal subunit localization		AO090003001231	-2.69539	Ortholog(s) have heat shock protein binding activity, role in protein folding and cytosol, nucleus localization
AO090003000414	3.12702	Has domain(s) with predicted role in transmembrane transport		AO090023000690	-2.6972	Ortholog(s) have dolichyl-diphosphooligosaccharide-protein glycotransferase activity, role in protein N-linked glycosylation and oligosaccharyltransferase complex localization
AO090120000437	3.12878	Ortholog(s) have endoplasmic reticulum, nuclear envelope localization		AO090005001150	-2.70933	Ortholog(s) have adenylosuccinate synthase activity, sulfinylpropanyl adenylate synthase activity, role in 'de novo' AMP biosynthetic process, cellular response to cadmium ion, fumarate metabolic process and cytosol, nucleus localization
AO090002000050	3.13268	Ortholog of A. nidulans FGSC A4 : AN20013 and A. fumigatus Af293 : AfuMt00070		AO090701000397	-2.70993	Ortholog(s) have RNA helicase activity, RNA-dependent ATPase activity, inositol hexakisphosphate binding activity and role in mRNA export from nucleus, translational termination
AO090005000719	3.13992	Ortholog(s) have histone-arginine N-methyltransferase activity, ribosome binding activity and role in peptidyl-arginine methylation, to asymmetrical-dimethyl arginine, ribosome biogenesis		AO090005000791	-2.71113	Ortholog(s) have cytosol localization
AO090020000450	3.17277	Putative woronin body protein		AO090026000066	-2.71284	Has domain(s) with predicted hydrolase activity
AO090003000404	3.17722	Has domain(s) with predicted ATP binding, microtubule binding, microtubule motor activity, role in microtubule-based movement and microtubule associated complex localization		AO090038000565	-2.71335	Ortholog(s) have nicotinate phosphoribosyltransferase activity and role in cell-abiotic substrate adhesion, chromatin silencing at rDNA, chromatin silencing at telomere, nicotinate nucleotide salvage, replicative cell aging
AO090003000012	3.18975	Ortholog(s) have role in cellular ion homeostasis, establishment or maintenance of cell polarity, mitochondrion inheritance, regulation of cardiolipin metabolic process and mitochondrial inner membrane, nucleus localization		AO090003001430	-2.71442	Cytochrome P450 monooxygenase
AO090023000916	3.20237	Ortholog(s) have CDP reductase activity, nucleoside diphosphate kinase activity, nucleotide binding activity		AO090023000474	-2.71708	Ortholog(s) have 1,3-beta-glucanosyltransferase activity, role in fungal-type cell wall organization and fungal-type cell wall, plasma membrane localization
AO090005000445	3.20249	Has domain(s) with predicted nucleic acid binding, nucleotide binding activity		AO090102000117	-2.71908	Ortholog of A. nidulans FGSC A4 : AN5649, AN1674, AN0384, AN1268, AN7262 and A. fumigatus Af293 : Afu1g01700, Afu2g17000, Afu4g08730, Afu4g13630, Afu1g10012
AO090023000725	3.21743	Ortholog(s) have role in heme a biosynthetic process and mitochondrion localization		AO090138000075	-2.72365	D-stereoselective aminopeptidase
AO090003000591	3.2224	Ortholog of A. nidulans FGSC A4 : AN4945, A. fumigatus Af293 : Afu3g10420, A. niger CBS 513.88 : An16g04350, Aspergillus wentii : Aspwe1_0049222 and Aspergillus sydowii : Aspsy1_0029595		AO090103000165	-2.73912	Ortholog(s) have role in ferric triacetylfusarinine C transport
AO090002000010	3.23849	Ortholog(s) have proton-transporting ATP synthase activity, rotational mechanism activity, role in ATP synthesis coupled proton transport and mitochondrial proton-transporting ATP synthase complex, coupling factor F(o) localization		AO090003000821	-2.74898	Ortholog(s) have DNA binding, ubiquitin-protein transferase activity and role in histone catabolic process, histone ubiquitination, regulation of transcription from RNA polymerase II promoter in response to oxidative stress
AO090038000569	3.26202	Ortholog(s) have role in conidium formation, negative regulation of conidium formation, positive regulation of sexual sporulation resulting in formation of a cellular spore, sexual sporulation resulting in formation of a cellular spore		AO090005001659	-2.75334	Ortholog(s) have role in iron-sulfur cluster assembly, regulation of transcription from RNA polymerase II promoter, transcription from RNA polymerase II promoter and cytosol, nucleus localization
AO090023000215	3.27292	Ortholog of A. nidulans FGSC A4 : AN2442, A. fumigatus Af293 : Afu6g10590, A. niger CBS 513.88 : An11g00690, Aspergillus wentii : Aspwe1_0039416 and Aspergillus sydowii : Aspsy1_0141765		AO090009000696	-2.76118	Ortholog(s) have L-glutamine transmembrane transporter activity, L-isoleucine transmembrane transporter activity, L-tyrosine transmembrane transporter activity and role in amino acid transmembrane transport, vacuolar transport
AO090120000170	3.27564	Has domain(s) with predicted oxidoreductase activity and role in metabolic process		AO090003000966	-2.76202	Ortholog(s) have U2-type spliceosomal complex localization
AO090003000901	3.28318	Has domain(s) with predicted GTP binding, guanyl-nucleotide exchange factor activity, role in regulation of small GTPase mediated signal transduction, small GTPase mediated signal transduction and intracellular localization		AO090009000208	-2.77164	protein of unknown function
AO090012000201	3.30816	Ortholog of A. nidulans FGSC A4 : AN2151, A. fumigatus Af293 : Afu2g16000, A. niger CBS 513.88 : An15g06350, Aspergillus wentii : Aspwe1_0077396 and Aspergillus sydowii : Aspsy1_0366918		AO090120000235	-2.80895	Ortholog(s) have protein serine/threonine kinase activity
AO090003000183	3.32422	Ortholog(s) have cytosol localization		AO090005000433	-2.81446	Ortholog(s) have phospholipase D activity and role in phospholipid metabolic process
AO090026000537	3.32428	Ortholog(s) have Rab GDP-dissociation inhibitor activity, role in vesicle-mediated transport and cell division site, cytosol localization		AO090012000526	-2.81644	Ortholog(s) have transketolase activity, role in pentose-phosphate shunt and cytosol, extracellular region, nucleus localization
AO090206000027	3.33427	Ortholog(s) have role in protein import into mitochondrial outer membrane and mitochondrial outer membrane localization		AO090010000763	-2.81662	Ortholog of A. fumigatus Af293 : Afu8g02720, A. niger CBS 513.88 : An03g06820, Aspergillus wentii : Aspwe1_0177783, Aspergillus sydowii : Aspsy1_0050811 and Aspergillus terreus NIH2624 : ATET_10385
AO090001000706	3.36787	Ortholog(s) have calcium ion binding, calcium-transporting ATPase activity, manganese-transporting ATPase activity		AO090001000762	-2.82487	Ortholog(s) have cytosol, nucleus localization
AO090005000668	3.3881	Ortholog(s) have single-stranded RNA binding activity, role in ribosomal large subunit biogenesis, ribosome assembly and cytosol, nucleolus, preribosome, large subunit precursor localization		AO090020000448	-2.82745	Ortholog of A. nidulans FGSC A4 : AN4696, A. fumigatus Af293 : Afu5g08820, A. niger CBS 513.88 : An07g04590, Aspergillus wentii : Aspwe1_0023715 and Aspergillus sydowii : Aspsy1_0033180
AO090102000510	3.39316	Ortholog(s) have cytosol, nucleus localization		AO090701000172	-2.83158	Ortholog(s) have role in reciprocal meiotic recombination and cytosol, endoplasmic reticulum, nucleus localization
AO090102000638	3.39981	Ortholog(s) have GTPase activity and role in ER to Golgi vesicle-mediated transport, Golgi organization, cellular response to drug, negative regulation of G0 to G1 transition, protein secretion		AO090023001003	-2.83559	Ortholog(s) have cytosol, nucleus localization
AO090005001637	3.40343	Ortholog of A. nidulans FGSC A4 : AN1389, A. niger CBS 513.88 : An08g00380, Neosartorya fischeri NRRL 181 : NFIA_016750 and Aspergillus versicolor : Aspve1_0059354		AO090120000294	-2.85896	Ortholog(s) have cytoplasm localization
AO090701000577	3.41779	Ortholog(s) have role in chromatin silencing by small RNA and cytosol, nucleus localization		AO090003000017	-2.87004	Has domain(s) with predicted catalytic activity and role in metabolic process
AO090005001641	3.41783	Ortholog(s) have cytosol, nucleus localization		AO090009000201	-2.8778	Ortholog(s) have cytosol localization
AO090003001025	3.45656	Protein serine/threonine kinase		AO090012000967	-2.88466	Ortholog(s) have cytosol, nucleus localization
AO090001000717	3.47115	Ortholog(s) have glutamate dehydrogenase (NAD+) activity, role in nitrogen compound metabolic process and cytosol localization		AO090012000624	-2.88948	Ortholog(s) have nitrite reductase [NAD(P)H] activity and role in nitrogen compound metabolic process
AO090113000120	3.48846	Has domain(s) with predicted catalytic activity and membrane localization		AO090003000010	-2.89913	Ortholog(s) have COPII adaptor activity and role in ER to Golgi vesicle-mediated transport, fungal-type cell wall organization, protein glycosylation, protein retention in Golgi apparatus
AO090020000330	3.49983	Ortholog(s) have ligase activity, role in protein lipoylation and mitochondrion localization		AO090012000595	-2.90182	Ortholog of A. nidulans FGSC A4 : AN1021, A. fumigatus Af293 : Afu1g12980, Aspergillus wentii : Aspwe1_0498638, Aspergillus sydowii : Aspsy1_0053349 and Aspergillus terreus NIH2624 : ATET_00493
AO090023000865	3.50945	Ortholog(s) have protein anchor activity and role in establishment of spindle pole body localization to nuclear envelope, mitotic spindle assembly		AO090003000156	-2.9021	Has domain(s) with predicted GTPase activator activity, zinc ion binding activity
AO090009000379	3.54299	Ortholog(s) have role in asymmetric protein localization to old mitotic spindle pole body, establishment or maintenance of cytoskeleton polarity, negative regulation of septation initiation signaling		AO090003001322	-2.9108	Predicted glyceraldehyde-3-phosphate dehydrogenase with role in glycolysis
AO090005001466	3.56787	Has domain(s) with predicted role in mRNA processing		AO090003000536	-2.93319	Has domain(s) with predicted sequence-specific DNA binding, transcription factor activity, sequence-specific DNA binding activity and role in regulation of transcription, DNA-templated
AO090010000776	3.56833	Ortholog(s) have GTPase activity, protein homodimerization activity		AO090001000561	-2.94135	Ortholog(s) have cytosol, nucleus localization
AO090038000471	3.57197	Maltase		AO090026000135	-2.94306	Ortholog(s) have cytosol localization
AO090001000681	3.57291	Ortholog(s) have poly(U) RNA binding activity, role in negative regulation of induction of conjugation with cellular fusion by negative regulation of transcription from RNA polymerase II promoter and cytosol localization		AO090001000343	-2.94804	Has domain(s) with predicted hydrolase activity, acting on ester bonds activity and role in GPI anchor metabolic process, intracellular protein transport
AO090124000094	3.59175	Has domain(s) with predicted ATP binding, calcium-transporting ATPase activity, cation-transporting ATPase activity, metal ion binding, nucleotide binding activity and role in calcium ion transmembrane transport, cation transport		AO090011000649	-2.9554	Ortholog(s) have cytidine transmembrane transporter activity, drug transmembrane transporter activity, nucleobase transmembrane transporter activity
AO090003001177	3.60422	Ortholog of A. nidulans FGSC A4 : AN1995, A. fumigatus Af293 : Afu4g10400, A. niger CBS 513.88 : An04g06400, Aspergillus wentii : Aspwe1_0022851 and Aspergillus sydowii : Aspsy1_0053931		AO090009000651	-2.95637	Ortholog(s) have ATPase activity, coupled to transmembrane movement of substances activity, role in cellular response to drug, drug transmembrane transport and plasma membrane, vacuole localization
AO090009000697	3.60894	Ortholog(s) have rRNA (adenine) methyltransferase activity and nucleolus localization		AO090012000934	-2.9605	Ortholog of A. nidulans FGSC A4 : AN2190, A. fumigatus Af293 : Afu6g07150, A. niger CBS 513.88 : An14g03270, Aspergillus wentii : Aspwe1_0111852 and Aspergillus sydowii : Aspsy1_0193838
AO090003000222	3.62005	Ortholog(s) have gamma-glutamyltransferase activity, omega peptidase activity, role in glutathione catabolic process and cytoplasm, glutathione hydrolase complex, nuclear periphery localization		AO090023000966	-2.97912	Has domain(s) with predicted heme binding activity
AO090102000556	3.64983	Ortholog(s) have cytoplasm localization		AO090701000206	-2.99383	4-aminobutyrate transaminase, GABA transaminase
AO090012000731	3.65039	Has domain(s) with predicted hydrolase activity and role in metabolic process		AO090009000209	-2.99623	protein of unknown function
AO090005001554	3.68421	Ortholog(s) have role in fungal-type cell wall organization, protein oligomerization and Golgi apparatus, cell cortex of cell tip, cell division site, cellular bud, membrane raft, plasma membrane localization		AO090020000537	-3.01695	Ortholog(s) have Golgi apparatus, fungal-type vacuole membrane localization
AO090120000132	3.69127	Ortholog(s) have glucosamine 6-phosphate N-acetyltransferase activity, role in UDP-N-acetylglucosamine biosynthetic process, pathogenesis and cytosol, nucleus localization		AO090012000630	-3.0374	Ortholog(s) have role in establishment or maintenance of cell polarity
AO090005001667	3.69898	Has domain(s) with predicted phosphatidylinositol phospholipase C activity, phosphoric diester hydrolase activity and role in intracellular signal transduction, lipid metabolic process		AO090023000932	-3.04052	Ortholog(s) have hyphal tip localization
AO090011000768	3.70368	Ortholog(s) have metallochaperone activity, pyridoxal phosphate binding activity, role in manganese ion transport, pyridoxal phosphate transport and mitochondrion localization		AO090023000107	-3.05298	Ortholog of A. nidulans FGSC A4 : AN6342, A. fumigatus Af293 : Afu2g14260, A. niger CBS 513.88 : An02g01220, Aspergillus wentii : Aspwe1_0045565 and Aspergillus sydowii : Aspsy1_0031691
AO090701000815	3.72756	Has domain(s) with predicted role in transmembrane transport		AO090113000013	-3.05385	Has domain(s) with predicted zinc ion binding activity
AO090102000290	3.76054	Has domain(s) with predicted dTDP-4-dehydrorhamnose reductase activity and role in extracellular polysaccharide biosynthetic process		AO090103000037	-3.06196	Ortholog(s) have snoRNA binding activity
AO090102000550	3.7624	Ortholog(s) have cytosol, nucleus localization		AO090005001591	-3.09243	Ortholog(s) have nucleus localization
AO090038000354	3.78688	Ortholog of A. nidulans FGSC A4 : AN1213, A. fumigatus Af293 : Afu1g10650, A. niger CBS 513.88 : An08g02730, Neosartorya fischeri NRRL 181 : NFIA_014990 and Aspergillus versicolor : Aspve1_0119055		AO090001000070	-3.09864	Ortholog of A. nidulans FGSC A4 : AN3258, A. fumigatus Af293 : Afu8g07090, A. niger CBS 513.88 : An05g02250, Neosartorya fischeri NRRL 181 : NFIA_099870 and Aspergillus clavatus NRRL 1 : ACLA_017870
AO090009000073	3.80239	Has domain(s) with predicted RNA binding, RNA-directed DNA polymerase activity and role in RNA-dependent DNA replication		AO090005000757	-3.10707	Ortholog(s) have mitochondrion localization
AO090011000776	3.82184	Ortholog of A. nidulans FGSC A4 : AN6081, AN0849, A. fumigatus Af293 : Afu1g15080, Afu2g09190, A. niger CBS 513.88 : An01g13240, An12g04840 and A. oryzae RIB40 : AO090005001220		AO090005000165	-3.11391	Has domain(s) with predicted nucleic acid binding, transcription factor activity, sequence-specific DNA binding, zinc ion binding activity, role in regulation of transcription, DNA-templated and nucleus localization
AO090020000312	3.82238	Ortholog of A. nidulans FGSC A4 : AN4795, A. fumigatus Af293 : Afu3g06850, A. niger CBS 513.88 : An11g09490, Aspergillus wentii : Aspwe1_0173582 and Aspergillus sydowii : Aspsy1_0146436		AO090038000585	-3.11582	Has domain(s) with predicted DNA-directed RNA polymerase activity and role in transcription, DNA-templated
AO090701000030	3.83292	Ortholog(s) have cytosol, nucleus localization		AO090020000322	-3.11685	Ortholog of A. nidulans FGSC A4 : AN4786, A. fumigatus Af293 : Afu3g06750, A. niger CBS 513.88 : An11g09580, Aspergillus wentii : Aspwe1_0562759 and Aspergillus sydowii : Aspsy1_0147721
AO090011000532	3.83476	Ortholog(s) have role in ascospore formation, conidium formation, hyphal growth, regulation of meiosis I, regulation of mitotic nuclear division, syncytium formation by plasma membrane fusion, vacuole organization		AO090023000241	-3.11886	Ortholog of A. niger CBS 513.88 : An11g00890, Neosartorya fischeri NRRL 181 : NFIA_056230, Aspergillus wentii : Aspwe1_0039389 and Aspergillus clavatus NRRL 1 : ACLA_084080
AO090103000034	3.83909	Ortholog of A. nidulans FGSC A4 : AN1431, A. fumigatus Af293 : Afu8g04190, A. niger CBS 513.88 : An16g08890, Aspergillus wentii : Aspwe1_0043828 and Aspergillus sydowii : Aspsy1_0055863		AO090023000843	-3.13042	Ortholog of A. fumigatus Af293 : Afu4g07300, A. niger CBS 513.88 : An04g01690, Neosartorya fischeri NRRL 181 : NFIA_108920 and Aspergillus wentii : Aspwe1_0246683
AO090012000951	3.8784	Ortholog(s) have role in DNA repair, G2 DNA damage checkpoint		AO090701000219	-3.13135	Ortholog(s) have cytosol, nucleus localization
AO090701000244	3.88485	Glycoside hydrolase family 3		AO090009000226	-3.1355	Ortholog(s) have DNA translocase activity, chromatin binding, single-stranded DNA binding activity
AO090120000088	3.93732	Ortholog(s) have ATPase activity, coupled to transmembrane movement of ions, phosphorylative mechanism, phospholipid-translocating ATPase activity		AO090103000421	-3.13653	Permease of the major facilitator (MFS) superfamily
AO090701000319	3.96378	Has domain(s) with predicted UDP-N-acetylmuramate dehydrogenase activity, flavin adenine dinucleotide binding, oxidoreductase activity, oxidoreductase activity and acting on paired donors, more		AO090012000815	-3.14658	Ortholog of A. fumigatus Af293 : Afu3g02253, Neosartorya fischeri NRRL 181 : NFIA_003390, Aspergillus clavatus NRRL 1 : ACLA_062150 and Aspergillus zonatus : Aspzo1_0135140
AO090038000589	3.97685	Ortholog of A. nidulans FGSC A4 : AN11164, A. fumigatus Af293 : Afu7g02110, Neosartorya fischeri NRRL 181 : NFIA_114840, Aspergillus wentii : Aspwe1_0579892 and Aspergillus clavatus NRRL 1 : ACLA_065410		AO090003000630	-3.14838	Has domain(s) with predicted oxidoreductase activity and role in oxidation-reduction process
AO090003000375	3.98963	Ortholog(s) have COPI-coated vesicle, Golgi apparatus localization		AO090026000550	-3.14967	Ortholog(s) have GTPase activity, role in Golgi to plasma membrane protein transport, cellular response to drug, endocytosis, protein targeting to vacuole and cytosol, trans-Golgi network localization
AO090003000925	3.99791	Ortholog(s) have mitochondrion localization		AO090038000459	-3.15516	Ortholog of A. nidulans FGSC A4 : AN1278
AO090026000282	4.01169	Has domain(s) with predicted role in response to stress		AO090003000724	-3.16559	Ortholog(s) have cell division site, cell tip localization
AO090012000593	4.02205	Ortholog(s) have role in potassium ion transport, proton transport and integral component of mitochondrial inner membrane localization		AO090701000473	-3.19467	Ortholog(s) have lysophospholipase activity, role in phosphatidylinositol metabolic process, phosphatidylserine catabolic process and anchored component of plasma membrane, extracellular region localization
AO090011000855	4.02226	Ortholog(s) have mRNA binding, pseudouridine synthase activity, role in mRNA pseudouridine synthesis, snRNA pseudouridine synthesis, tRNA pseudouridine synthesis and nucleus localization		AO090020000521	-3.19901	Ortholog(s) have superoxide dismutase activity
AO090026000475	4.02882	Has domain(s) with predicted ATP binding, protein kinase activity, protein tyrosine kinase activity and role in protein phosphorylation		AO090003001194	-3.21722	Ortholog(s) have histidine phosphotransfer kinase activity and role in osmosensory signaling via phosphorelay pathway
AO090001000418	4.04728	Ortholog(s) have mitotic spindle, nucleolus localization		AO090003000485	-3.21747	Ortholog of A. nidulans FGSC A4 : AN0805, A. fumigatus Af293 : Afu1g14640, A. niger CBS 513.88 : An01g12640, Aspergillus wentii : Aspwe1_0487250 and Aspergillus sydowii : Aspsy1_0025994
AO090005000978	4.04858	Ortholog(s) have GTPase activity, role in Golgi to plasma membrane protein transport, protein localization to organelle and Golgi apparatus, nuclear outer membrane-endoplasmic reticulum membrane network localization		AO090020000109	-3.21934	Ortholog(s) have role in ubiquinone biosynthetic process and mitochondrial inner membrane localization
AO090003001349	4.05992	Has domain(s) with predicted ubiquitinyl hydrolase activity, zinc ion binding activity and role in protein deubiquitination, ubiquitin-dependent protein catabolic process		AO090020000419	-3.22151	Has domain(s) with predicted N-acetyltransferase activity
AO090009000257	4.08259	Ortholog(s) have role in cellular response to drug, cellular sphingolipid homeostasis, negative regulation of sphingolipid biosynthetic process, response to unfolded protein and SPOTS complex localization		AO090701000913	-3.247	Has domain(s) with predicted nucleic acid binding, zinc ion binding activity
AO090012000673	4.10161	Has domain(s) with predicted flavin adenine dinucleotide binding, oxidoreductase activity and role in oxidation-reduction process		AO090009000261	-3.28479	Ortholog of A. nidulans FGSC A4 : AN1940, A. fumigatus Af293 : Afu4g13200, A. niger CBS 513.88 : An01g08880, Aspergillus wentii : Aspwe1_0166484 and Aspergillus terreus NIH2624 : ATET_03203
AO090011000660	4.10839	Ortholog of A. nidulans FGSC A4 : AN6038, A. fumigatus Af293 : Afu2g09780, A. niger CBS 513.88 : An16g05430, Aspergillus wentii : Aspwe1_0045086 and Aspergillus sydowii : Aspsy1_0132339		AO090005001564	-3.28507	Ortholog of A. nidulans FGSC A4 : AN5204, A. fumigatus Af293 : Afu6g07370, A. niger CBS 513.88 : An07g09060, Aspergillus wentii : Aspwe1_0040832 and Aspergillus sydowii : Aspsy1_0156764
AO090026000369	4.14202	Ortholog of A. nidulans FGSC A4 : AN6290, A. fumigatus Af293 : Afu2g12370, A. niger CBS 513.88 : An02g04480, Aspergillus sydowii : Aspsy1_0045374 and Aspergillus terreus NIH2624 : ATET_01169		AO090012000267	-3.28507	Transcriptional activator of genes involved in xylan and cellulose degradation
AO090026000346	4.15638	Ortholog(s) have nucleus localization		AO090005000572	-3.29156	Has domain(s) with predicted N-acetyltransferase activity
AO090003000596	4.17327	Ortholog of A. nidulans FGSC A4 : AN4938, A. fumigatus Af293 : Afu3g10500, A. niger CBS 513.88 : An16g04440, Aspergillus wentii : Aspwe1_0049228 and Aspergillus sydowii : Aspsy1_0146146		AO090023000728	-3.29802	Ortholog(s) have delta14-sterol reductase activity and role in cellular response to drug, ergosterol biosynthetic process, filamentous growth of a population of unicellular organisms in response to biotic stimulus, pathogenesis
AO090003000467	4.18741	Ortholog(s) have polyubiquitin binding, protein binding, bridging activity and role in ER-associated ubiquitin-dependent protein catabolic process, negative regulation of protein catabolic process, spindle pole body duplication		AO090005001292	-3.31749	Ortholog(s) have DNA-directed DNA polymerase activity, double-stranded DNA binding, mRNA binding, single-stranded DNA 3'-5' exodeoxyribonuclease activity, single-stranded DNA binding activity
AO090023000961	4.21356	Ortholog of A. nidulans FGSC A4 : AN4333, A. fumigatus Af293 : Afu4g06300, Neosartorya fischeri NRRL 181 : NFIA_109850, Aspergillus wentii : Aspwe1_0034740 and Aspergillus versicolor : Aspve1_0756547		AO090038000524	-3.3254	Ortholog(s) have role in Group I intron splicing and mitochondrion localization
AO090701000051	4.22738	Ortholog of A. nidulans FGSC A4 : AN6529, A. fumigatus Af293 : Afu6g04880, A. niger CBS 513.88 : An15g00440, Aspergillus wentii : Aspwe1_0326252 and Aspergillus sydowii : Aspsy1_0164130		AO090005000592	-3.34707	Ortholog(s) have cytosol, glyoxysome, mitochondrion, nucleus localization
AO090003001568	4.23972	Ortholog of A. nidulans FGSC A4 : AN0803, A. fumigatus Af293 : Afu1g14620, A. niger CBS 513.88 : An01g12620, Aspergillus wentii : Aspwe1_0027658 and Aspergillus sydowii : Aspsy1_0139476		AO090005000135	-3.35797	Ortholog(s) have ATP phosphoribosyltransferase activity, role in histidine biosynthetic process and cytosol localization
AO090023000647	4.25317	Protein serine/threonine kinase		AO090023000702	-3.36452	Ortholog(s) have thioredoxin peroxidase activity, role in cellular response to oxidative stress, sporocarp development involved in sexual reproduction and extracellular region, glyoxysome, nucleus localization
AO090120000091	4.27546	Ortholog(s) have fungal-type vacuole membrane, vacuolar proton-transporting V-type ATPase, V1 domain localization		AO090005001452	-3.38871	Ortholog(s) have role in mitotic sister chromatid cohesion and nuclear mitotic cohesin complex localization
AO090103000340	4.28647	Ortholog of A. nidulans FGSC A4 : AN5446, A. fumigatus Af293 : Afu6g13500, A. niger CBS 513.88 : An08g08820, Neosartorya fischeri NRRL 181 : NFIA_059450 and Aspergillus versicolor : Aspve1_0084095		AO090012001035	-3.40158	Nitrate reductase with a predicted role in nitrogen metabolism
AO090026000136	4.28892	Ortholog(s) have role in mitotic chromosome condensation, mitotic sister chromatid cohesion, positive regulation of maintenance of mitotic sister chromatid cohesion, centromeric and cytosol, nuclear mitotic cohesin complex localization		AO090005000016	-3.40578	Ortholog of A. fumigatus Af293 : Afu3g04050, A. niger CBS 513.88 : An16g00070, Neosartorya fischeri NRRL 181 : NFIA_006360 and Aspergillus clavatus NRRL 1 : ACLA_060700
AO090003000158	4.29441	Ortholog(s) have RSC complex, cytosol localization		AO090701000189	-3.41013	Ortholog(s) have role in chromatin silencing at centromere and Rix1 complex, mitotic spindle pole body, nuclear heterochromatin localization
AO090001000489	4.29683	Ortholog(s) have membrane insertase activity, role in mitochondrial respiratory chain complex IV assembly, protein insertion into mitochondrial membrane, protein transport and integral component of mitochondrial inner membrane localization		AO090012000329	-3.42643	Ortholog of A. nidulans FGSC A4 : AN7580, A. fumigatus Af293 : Afu2g15110, A. niger CBS 513.88 : An15g02960, Aspergillus wentii : Aspwe1_0044605 and Aspergillus sydowii : Aspsy1_0046014
AO090009000591	4.29743	Ortholog(s) have plasma membrane localization		AO090023000965	-3.43005	Ortholog(s) have mRNA binding activity, role in cellular response to drug, maturation of LSU-rRNA from tricistronic rRNA transcript (SSU-rRNA, 5.8S rRNA, LSU-rRNA) and nucleolus, preribosome, large subunit precursor localization
AO090005001272	4.30806	Ortholog(s) have role in cellular copper ion homeostasis, mitochondrial respiratory chain complex IV assembly and mitochondrial intermembrane space, nucleus localization		AO090003001011	-3.43651	Ortholog(s) have role in cleistothecium development, tryptophan biosynthetic process and cytosol, nucleus localization
AO090003001242	4.30845	Has domain(s) with predicted ATP binding, inositol pentakisphosphate 2-kinase activity		AO090001000335	-3.4528	Ortholog(s) have zinc ion transmembrane transporter activity, role in cellular zinc ion homeostasis, zinc II ion transmembrane transport and Golgi membrane, cytosol, nucleus localization
AO090003000239	4.32322	Has domain(s) with predicted hydrolase activity, hydrolyzing O-glycosyl compounds activity and role in carbohydrate metabolic process		AO090010000463	-3.4544	Ortholog(s) have UDP-glucose 4-epimerase activity, role in galactose metabolic process, protein galactosylation and cytoplasm localization
AO090005001098	4.32429	Ortholog(s) have choline kinase activity, ethanolamine kinase activity, role in phosphatidylcholine biosynthetic process, phosphatidylethanolamine biosynthetic process and cytosol, nucleus localization		AO090020000143	-3.46912	Ortholog(s) have cell septum, plasma membrane localization
AO090026000342	4.39139	Has domain(s) with predicted ATP binding, nucleoside-triphosphatase activity, nucleotide binding activity		AO090120000360	-3.4872	Ortholog(s) have role in invasive growth in response to glucose limitation, protein urmylation, pseudohyphal growth, tRNA wobble position uridine thiolation and cytosolic tRNA wobble base thiouridylase complex, nucleus localization
AO090005000580	4.41537	protein of unknown function		AO090120000284	-3.48793	Ortholog(s) have phosphatidylinositol-3,5-bisphosphate binding, ubiquitin binding activity
AO090023000827	4.41825	Has domain(s) with predicted zinc ion binding activity		AO090003000241	-3.48801	Ortholog(s) have cytosol, nucleus localization
AO090038000305	4.475	Ortholog(s) have nucleolus localization		AO090102000126	-3.50127	Ortholog(s) have actin filament binding, actin monomer binding activity and role in actin cortical patch organization, actin filament depolymerization, actin filament severing, sequestering of actin monomers
AO090102000145	4.49474	Ortholog(s) have role in ER to Golgi vesicle-mediated transport and ER to Golgi transport vesicle, fungal-type vacuole membrane, integral component of Golgi membrane, integral component of endoplasmic reticulum membrane localization		AO090005001558	-3.50516	Ortholog of A. nidulans FGSC A4 : AN5209, A. fumigatus Af293 : Afu6g07420, A. niger CBS 513.88 : An07g09010, Aspergillus wentii : Aspwe1_0516548 and Aspergillus sydowii : Aspsy1_0156708
AO090003001273	4.52228	Ortholog(s) have unfolded protein binding activity		AO090206000020	-3.533	Ortholog(s) have calcium:proton antiporter activity, potassium:proton antiporter activity, sodium:proton antiporter activity and role in hydrogen transport, potassium ion transport, sodium ion transport
AO090026000390	4.5535	Ortholog of A. nidulans FGSC A4 : AN6284, A. fumigatus Af293 : Afu2g12430, A. niger CBS 513.88 : An02g04620, Aspergillus wentii : Aspwe1_0175655 and Aspergillus sydowii : Aspsy1_0986615		AO090009000166	-3.53669	Ortholog of A. nidulans FGSC A4 : AN3724, A. fumigatus Af293 : Afu6g12460, A. niger CBS 513.88 : An06g01620, Aspergillus wentii : Aspwe1_0033694 and Aspergillus sydowii : Aspsy1_0044118
AO090005001201	4.60643	protein of unknown function		AO090001000748	-3.54141	Ortholog(s) have role in glycolipid translocation and endoplasmic reticulum membrane localization
AO090701000122	4.60989	Ortholog(s) have mannose-ethanolamine phosphotransferase activity		AO090003000702	-3.54381	Ortholog of A. nidulans FGSC A4 : AN2897, A. fumigatus Af293 : Afu3g11470, A. niger CBS 513.88 : An02g07310, Aspergillus wentii : Aspwe1_0365861 and Aspergillus sydowii : Aspsy1_0173783
AO090005001355	4.6283	Ortholog(s) have flavin-linked sulfhydryl oxidase activity and role in cellular iron ion homeostasis, cellular response to oxidative stress, protein import into mitochondrial intermembrane space		AO090009000681	-3.56552	Ortholog(s) have role in cellular magnesium ion homeostasis and fungal-type vacuole membrane, vacuole-mitochondrion membrane contact site localization
AO090001000726	4.63632	Ortholog of A. nidulans FGSC A4 : AN7443, A. fumigatus Af293 : Afu2g06100, A. niger CBS 513.88 : An02g14710, Aspergillus wentii : Aspwe1_0110234 and Aspergillus sydowii : Aspsy1_0152786		AO090012000998	-3.57028	Ortholog(s) have coproporphyrinogen oxidase activity, role in cellular response to hypoxia, heme biosynthetic process and cell surface, cytosol, extracellular region, mitochondrion, nucleus, yeast-form cell wall localization
AO090005000574	4.64384	Ortholog(s) have role in G2/M transition of mitotic cell cycle and asexual sporulation resulting in formation of a cellular spore, more		AO090011000326	-3.60506	Ortholog(s) have 3-hydroxyacyl-CoA dehydrogenase activity, 3-hydroxybutyryl-CoA epimerase activity, enoyl-CoA hydratase activity
AO090701000754	4.64999	Ortholog(s) have role in poly(A)+ mRNA export from nucleus and nucleus localization		AO090003000725	-3.62284	Predicted fructose 1,6-bisphosphate aldolase with role in glycolysis
AO090012000984	4.65353	Ortholog of A. nidulans FGSC A4 : AN10645, A. fumigatus Af293 : Afu1g07310, A. niger CBS 513.88 : An07g09850, Aspergillus wentii : Aspwe1_0040933 and Aspergillus sydowii : Aspsy1_0155965		AO090023000092	-3.64262	Has domain(s) with predicted role in transmembrane transport
AO090011000964	4.66423	Ortholog of A. nidulans FGSC A4 : AN5927, A. fumigatus Af293 : Afu2g10790, Aspergillus wentii : Aspwe1_0117218, Aspergillus sydowii : Aspsy1_0132184 and Aspergillus terreus NIH2624 : ATET_01498		AO090011000708	-3.65908	Ortholog(s) have biotin-[acetyl-CoA-carboxylase] ligase activity, biotin-[pyruvate-carboxylase] ligase activity, role in protein biotinylation and cytoplasm, nucleus localization
AO090012000299	4.66997	protein of unknown function		AO090005000854	-3.66735	Ortholog(s) have nucleus localization
AO090003000311	4.72512	Ortholog(s) have role in establishment of spindle localization and mitotic spindle localization		AO090001000294	-3.67774	Ortholog(s) have role in pathogenesis and cell surface, extracellular region localization
AO090005000588	4.74835	Putative acetate CoA-transferase		AO090026000425	-3.68828	Ortholog(s) have role in establishment of cell polarity, hyphal growth, positive regulation of mitotic cell cycle, regulation of actin cytoskeleton organization and TORC2 complex, cytosol localization
AO090020000030	4.76975	Ortholog of A. nidulans FGSC A4 : AN3445, A. fumigatus Af293 : Afu3g05580, A. niger CBS 513.88 : An11g11050, Aspergillus wentii : Aspwe1_0173708 and Aspergillus sydowii : Aspsy1_0088185		AO090012000926	-3.69878	Ortholog(s) have alanine-glyoxylate transaminase activity, role in glycine biosynthetic process, by transamination of glyoxylate and mitochondrion localization
AO090005000577	4.77892	Ortholog of Aspergillus glaucus : Aspgl1_1516651, Aspergillus flavus NRRL 3357 : AFL2T_00573 and Aspergillus aculeatus ATCC16872 : Aacu16872_044768		AO090701000767	-3.70461	Ortholog(s) have AMP-activated protein kinase activity, ARF guanyl-nucleotide exchange factor activity
AO090020000599	4.78658	Ortholog(s) have structural molecule activity and mitochondrial large ribosomal subunit localization		AO090026000490	-3.70816	Ortholog(s) have UDP-glucose:hexose-1-phosphate uridylyltransferase activity, role in UDP-D-galactose biosynthetic process, galactose metabolic process, protein galactosylation and cytosol, nucleus localization
AO090011000493	4.80239	Ortholog(s) have ATPase activity, chromatin binding activity, role in DNA unwinding involved in DNA replication, mitotic chromosome condensation, rDNA condensation, tRNA gene clustering and cytosol, nuclear condensin complex localization		AO090001000374	-3.70963	G-protein coupled receptor
AO090012000805	4.82345	Ortholog(s) have role in assembly of large subunit precursor of preribosome, maturation of LSU-rRNA, ribosomal large subunit assembly and 90S preribosome, nucleolus, nucleoplasm, preribosome, large subunit precursor localization		AO090701000359	-3.72376	Ortholog(s) have inositol-3-phosphate synthase activity, role in inositol biosynthetic process and cell surface, cytoplasm, hyphal cell wall localization
AO090102000591	4.84421	Ortholog(s) have role in conidiophore development, conidium formation, hyphal growth, regulation of protein secretion, response to salt stress, sporocarp development involved in sexual reproduction		AO090005001206	-3.73386	Ortholog of A. nidulans FGSC A4 : AN0861, A. fumigatus Af293 : Afu1g15250, Aspergillus wentii : Aspwe1_0051149, Aspergillus sydowii : Aspsy1_0122516 and Aspergillus terreus NIH2624 : ATET_00827
AO090124000085	4.86067	Ortholog(s) have cytosol, nucleus localization		AO090003000310	-3.74396	Ortholog(s) have alternative oxidase activity, role in alternative respiration, cellular response to oxidative stress and mitochondrion, plasma membrane localization
AO090009000673	4.87594	Ortholog(s) have rRNA primary transcript binding activity		AO090003000457	-3.74429	Ortholog(s) have role in RNA metabolic process and cytosol, nucleus localization
AO090003000883	4.88226	Ortholog of A. nidulans FGSC A4 : AN0438, A. fumigatus Af293 : Afu1g04575, A. niger CBS 513.88 : An01g03530, Aspergillus wentii : Aspwe1_0025463 and Aspergillus terreus NIH2624 : ATET_03750		AO090120000130	-3.7445	protein of unknown function
AO090120000486	4.89175	Ortholog(s) have cyclosporin A binding, mRNA binding, peptidyl-prolyl cis-trans isomerase activity		AO090001000703	-3.75493	Ortholog(s) have RNA polymerase II regulatory region sequence-specific DNA binding, protein heterodimerization activity, transcriptional repressor activity, RNA polymerase II core promoter proximal region sequence-specific binding activity
AO090009000223	4.89284	Has domain(s) with predicted role in intracellular protein transport, vesicle-mediated transport and clathrin adaptor complex localization		AO090005001628	-3.75542	Ortholog(s) have role in cellular zinc ion homeostasis, endoplasmic reticulum inheritance, protein targeting to nuclear inner membrane, septin ring assembly
AO090001000037	4.92269	Ortholog(s) have flavin adenine dinucleotide binding, thiol oxidase activity, role in cellular response to mycotoxin, gliotoxin biosynthetic process and extracellular region localization		AO090701000310	-3.78048	Ortholog(s) have cytosol, nucleus localization
AO090003000547	4.94936	Ortholog(s) have extracellular region localization		AO090023001009	-3.79101	Ortholog(s) have glyoxysome localization
AO090003000190	4.94981	Ortholog of A. nidulans FGSC A4 : AN1910, A. fumigatus Af293 : Afu6g07610, Aspergillus wentii : Aspwe1_0715572, Aspergillus sydowii : Aspsy1_0039036 and Aspergillus terreus NIH2624 : ATET_05909		AO090005000739	-3.808	Ortholog(s) have glutathione peroxidase activity, phospholipid-hydroperoxide glutathione peroxidase activity, thioredoxin peroxidase activity
AO090012000721	4.953	Putative palmitoyl-acyl carrier protein (ACP) thioesterase with predicted role in fatty acid synthesis		AO090003000667	-3.8226	Ortholog(s) have protein homodimerization activity, role in double-strand break repair via homologous recombination, retrograde vesicle-mediated transport, Golgi to ER and cytosol, nucleus localization
AO090020000561	4.96888	Ortholog of A. nidulans FGSC A4 : AN8817, A. fumigatus Af293 : Afu5g09420, A. niger CBS 513.88 : An15g02370, Aspergillus wentii : Aspwe1_0099437 and Aspergillus sydowii : Aspsy1_0159282		AO090102000630	-3.83976	Homocysteine synthase
AO090102000272	4.97931	Ortholog(s) have cell division site, cell tip, cytosol localization		AO090038000401	-3.85796	Ortholog(s) have role in chromatin remodeling and Ino80 complex, cytosol localization
AO090009000516	4.98171	Ortholog of A. nidulans FGSC A4 : AN2629, AN8660, A. fumigatus Af293 : Afu6g01900, A. niger CBS 513.88 : An12g06490 and A. oryzae RIB40 : AO090038000052, AO090001000087		AO090005000841	-3.89619	Ortholog(s) have ubiquitin binding activity and role in actin cortical patch organization, endocytosis, endoplasmic reticulum unfolded protein response, positive regulation of cytokinesis
AO090026000545	4.98681	Has domain(s) with predicted ubiquitin-protein transferase activity, role in protein ubiquitination and ubiquitin ligase complex localization		AO090023000943	-3.89688	Putative transposase
AO090020000302	5.0397	Ortholog of A. nidulans FGSC A4 : AN4800, A. fumigatus Af293 : Afu3g06910, A. niger CBS 513.88 : An11g09440, Aspergillus wentii : Aspwe1_0562186 and Aspergillus sydowii : Aspsy1_0146673		AO090012000646	-3.89751	Ortholog of A. nidulans FGSC A4 : AN2498, A. fumigatus Af293 : Afu3g14090, Aspergillus wentii : Aspwe1_0407854, Aspergillus sydowii : Aspsy1_0148141 and Aspergillus terreus NIH2624 : ATET_04020
AO090102000617	5.04544	Ortholog(s) have cytosol, nucleus localization		AO090005001300	-3.90327	Predicted phosphoglyceromutase with role in glycolysis
AO090009000345	5.049	Ortholog(s) have cytosol localization		AO090038000386	-3.92315	Ortholog(s) have ATP binding, ATPase activity, double-stranded telomeric DNA binding, recombinase activity, single-stranded telomeric DNA binding activity
AO090005000603	5.05852	Ortholog of Aspergillus terreus NIH2624 : ATET_04778		AO090003001292	-3.92372	Ortholog(s) have transcription regulatory region DNA binding activity and role in regulation of carbon utilization, regulation of transcription from RNA polymerase II promoter, xylan catabolic process
AO090009000168	5.05939	Ortholog of A. nidulans FGSC A4 : AN11729, A. fumigatus Af293 : Afu6g12440, A. niger CBS 513.88 : An06g01600, Aspergillus wentii : Aspwe1_0033695 and Aspergillus terreus NIH2624 : ATET_03273		AO090020000060	-3.93232	Ortholog(s) have MAP kinase kinase activity
AO090012000922	5.07365	Ortholog of A. nidulans FGSC A4 : AN1338, AN9450, AN4381, A. fumigatus Af293 : Afu1g03040, Afu1g09510, Afu4g06700 and A. niger CBS 513.88 : An01g05230, An04g01090		AO090038000273	-3.94042	Ortholog of A. nidulans FGSC A4 : AN10149, A. fumigatus Af293 : Afu1g11510, A. niger CBS 513.88 : An08g03630, Neosartorya fischeri NRRL 181 : NFIA_014060 and Aspergillus wentii : Aspwe1_0028047
AO090026000476	5.08888	Ortholog(s) have cytoplasm localization		AO090020000010	-3.9535	Ortholog(s) have chaperone binding, sequence-specific DNA binding, unfolded protein binding activity
AO090003001087	5.10855	Ortholog(s) have ATPase activator activity, chaperone binding activity, role in cellular response to heat, positive regulation of ATPase activity, protein folding and cytosol localization		AO090012000938	-3.96629	Ortholog(s) have role in peptidyl-diphthamide biosynthetic process from peptidyl-histidine and cytosol localization
AO090003001186	5.12197	Ortholog of A. nidulans FGSC A4 : AN2001, A. fumigatus Af293 : Afu4g10340, A. niger CBS 513.88 : An04g06640, Aspergillus wentii : Aspwe1_0100896 and Aspergillus sydowii : Aspsy1_0053938		AO090012000733	-3.98213	Ortholog(s) have phosphatidylserine decarboxylase activity
AO090003000174	5.15743	Phosphoenolpyruvate carboxykinase		AO090103000005	-3.98263	Ortholog of A. niger CBS 513.88 : An16g09280, Aspergillus wentii : Aspwe1_0117885, Aspergillus versicolor : Aspve1_0880006 and Aspergillus sydowii : Aspsy1_0055893
AO090023000336	5.15787	Ortholog(s) have dolichyl-phosphate-mannose-protein mannosyltransferase activity		AO090011000843	-3.98498	Ortholog(s) have 1-acylglycerol-3-phosphate O-acyltransferase activity, role in glycerophospholipid biosynthetic process and endoplasmic reticulum, lipid particle, plasma membrane localization
AO090005000166	5.20678	Has domain(s) with predicted role in transmembrane transport and integral component of membrane localization		AO090701000671	-3.98551	Has domain(s) with predicted cytoplasm localization
AO090673000008	5.22704	Has domain(s) with predicted nucleic acid binding activity		AO090103000408	-3.99385	Ortholog(s) have ATP-dependent microtubule motor activity, plus-end-directed, protein dimerization activity, tubulin binding activity
AO090026000003	5.2981	Ortholog of Aspergillus flavus NRRL 3357 : AFL2T_07234 and Aspergillus aculeatus ATCC16872 : Aacu16872_053279		AO090120000365	-4.02822	Ortholog(s) have nucleolus localization
AO090020000408	5.29914	Ortholog(s) have GTPase activator activity		AO090003000058	-4.04651	Ortholog(s) have extracellular region localization
AO090012000864	5.32547	Ortholog(s) have role in cellular response to nitrogen starvation, chromatin silencing at centromere outer repeat region and chromatin silencing at silent mating-type cassette, more		AO090005001631	-4.0876	Ortholog(s) have protein-arginine omega-N monomethyltransferase activity and role in peptidyl-arginine methylation
AO090026000590	5.33507	Ortholog(s) have role in positive regulation of conjugation with cellular fusion and TORC1 complex, cytoplasm localization		AO090120000493	-4.08779	Predicted triosephosphate isomerase with role in glycolysis
AO090020000074	5.3455	Ortholog(s) have mitochondrion localization		AO090120000428	-4.09002	Ortholog of A. nidulans FGSC A4 : AN6861/phbB, AN9483, A. fumigatus Af293 : Afu3g00670, Afu5g13060, Afu8g01120, A. niger CBS 513.88 : An03g01130, An07g06330, An07g00905 and A. oryzae RIB40 : AO090113000089
AO090701000149	5.36402	Ortholog of A. nidulans FGSC A4 : AN6615, A. fumigatus Af293 : Afu6g03960, A. niger CBS 513.88 : An15g01520, Aspergillus wentii : Aspwe1_0048642 and Aspergillus sydowii : Aspsy1_0214118		AO090003001319	-4.09008	Ortholog(s) have role in coenzyme A biosynthetic process and CoA-synthesizing protein complex, endoplasmic reticulum, lipid particle, mitochondrion, nuclear envelope localization
AO090011000461	5.36515	Ortholog(s) have extracellular region localization		AO090701000146	-4.11188	Ortholog of A. nidulans FGSC A4 : AN6613, A. fumigatus Af293 : Afu6g04265, A. niger CBS 513.88 : An15g01490, Aspergillus wentii : Aspwe1_0322074 and Aspergillus sydowii : Aspsy1_0164382
AO090011000838	5.36945	Putative acetyl-CoA carboxylase with a predicted role in fatty acid biosynthesis		AO090005001131	-4.1167	Has domain(s) with predicted catalytic activity
AO090701000021	5.45282	Ortholog(s) have histone binding, histone deacetylase binding, mediator complex binding, phosphatidylinositol-3,5-bisphosphate binding, transcriptional repressor activity, RNA polymerase II transcription factor binding activity		AO090038000405	-4.11769	Ortholog of A. nidulans FGSC A4 : AN1258, A. fumigatus Af293 : Afu1g10210, A. niger CBS 513.88 : An08g02080, Aspergillus wentii : Aspwe1_0103837 and Aspergillus sydowii : Aspsy1_0083479
AO090026000812	5.5137	Ortholog of A. fumigatus Af293 : Afu7g04020, A. niger CBS 513.88 : An13g00480, Aspergillus wentii : Aspwe1_0429172, Aspergillus sydowii : Aspsy1_0154048 and Aspergillus terreus NIH2624 : ATET_04283		AO090002000040	-4.13235	Ortholog(s) have cytochrome-c oxidase activity, role in aerobic respiration, mitochondrial electron transport, cytochrome c to oxygen and mitochondrial respiratory chain complex IV localization
AO090020000468	5.5238	Ortholog(s) have endoplasmic reticulum localization		AO090023000815	-4.14285	Has domain(s) with predicted structural constituent of ribosome activity, role in translation and ribosome localization
AO090023000332	5.53317	Ortholog(s) have protein binding, bridging, ubiquitin binding activity, role in actin filament polymerization, endocytosis and actin cortical patch, mating projection tip, nucleus localization		AO090005001092	-4.1552	Ortholog(s) have flavin adenine dinucleotide binding, glutathione transferase activity, glutathione-disulfide reductase activity
AO090701000171	5.55489	Ortholog of A. nidulans FGSC A4 : AN6634, A. fumigatus Af293 : Afu6g03780, A. niger CBS 513.88 : An03g03510, Aspergillus wentii : Aspwe1_0048626 and Aspergillus sydowii : Aspsy1_0157274		AO090023000944	-4.16285	Alpha-amylase
AO090002000130	5.58529	Has domain(s) with predicted NADH dehydrogenase (ubiquinone) activity and role in ATP synthesis coupled electron transport		AO090012000174	-4.17612	Ortholog of A. nidulans FGSC A4 : AN2488, A. fumigatus Af293 : Afu3g00500, Afu4g03010, A. niger CBS 513.88 : An14g03080 and Aspergillus wentii : Aspwe1_0176515, Aspwe1_0622364
AO090138000095	5.61744	Ortholog of A. nidulans FGSC A4 : AN5367, A. fumigatus Af293 : Afu2g17475, Neosartorya fischeri NRRL 181 : NFIA_092880, Aspergillus wentii : Aspwe1_0032360 and Aspergillus clavatus NRRL 1 : ACLA_076380		AO090120000196	-4.18244	Alpha-amylase
AO090005001597	5.65353	Ortholog(s) have cytoplasm localization		AO090005000723	-4.18339	Ortholog of A. nidulans FGSC A4 : AN11707, A. fumigatus Af293 : Afu3g12460, A. niger CBS 513.88 : An02g08400, Aspergillus wentii : Aspwe1_0371733 and Aspergillus glaucus : Aspgl1_0043974
AO090012001003	5.67767	Ortholog(s) have cytosol, nucleus localization		AO090026000708	-4.21298	Ortholog(s) have antioxidant activity, protein disulfide oxidoreductase activity
AO090012000927	5.69587	Has domain(s) with predicted phosphatase activity		AO090023000697	-4.24659	Putative aldehyde dehydrogenase
AO090005001514	5.70679	Ortholog(s) have low-affinity zinc ion transmembrane transporter activity, role in low-affinity zinc II ion transport, response to zinc ion and plasma membrane localization		AO090011000588	-4.25558	Ortholog(s) have urate oxidase activity, role in purine nucleobase catabolic process and cytosol, extracellular region, nucleus localization
AO090102000541	5.74345	Ortholog(s) have NAD+ diphosphatase activity, role in NADH metabolic process and cytosol, nucleus, peroxisome localization		AO090003001142	-4.27746	Ortholog(s) have ATP-dependent 3'-5' DNA helicase activity, ATP-dependent 5'-3' DNA helicase activity, sequence-specific DNA binding activity
AO090701000015	5.78763	Ortholog(s) have cytoplasm localization		AO090005000776	-4.28507	Has domain(s) with predicted nucleic acid binding, zinc ion binding activity
AO090005001095	5.83836	Ortholog(s) have endoplasmic reticulum localization		AO090023000489	-4.29325	Ortholog of Aspergillus tubingensis : Asptu1_0609518, Aspergillus kawachii : Aspka1_0174977, Aspergillus acidus : Aspfo1_0071270 and Aspergillus wentii : Aspwe1_0026426
AO090009000552	5.83972	Ortholog(s) have (R)-carnitine transmembrane transporter activity, choline transmembrane transporter activity, ethanolamine transmembrane transporter activity		AO090206000044	-4.35932	Ortholog of A. nidulans FGSC A4 : AN6997, A. fumigatus Af293 : Afu4g04480, A. niger CBS 513.88 : An14g00340, Aspergillus wentii : Aspwe1_0159686 and Aspergillus sydowii : Aspsy1_0048994
AO090020000602	5.84331	Ortholog(s) have role in cellular iron ion homeostasis and mitochondrion localization		AO090005001548	-4.36399	Ortholog(s) have lipid binding activity and role in eisosome assembly, endocytosis, negative regulation of protein kinase activity, protein localization, response to heat
AO090023000532	5.91086	Has domain(s) with predicted hydrolase activity		AO090012000632	-4.38505	protein of unknown function
AO090026000613	5.91819	Ortholog(s) have ATP binding, ATPase activity, metallopeptidase activity, role in protein complex assembly, signal peptide processing and m-AAA complex, mitochondrial inner boundary membrane localization		AO090102000360	-4.40409	Ortholog(s) have thiamine pyrophosphate binding activity, role in hyphal growth, thiamine biosynthetic process and cytosol, nucleus localization
AO090026000435	5.93732	Ortholog(s) have cytoplasm localization		AO090026000200	-4.40977	Transcription regulatory region DNA binding protein
AO090023000762	5.96285	Ortholog(s) have glycylpeptide N-tetradecanoyltransferase activity, role in establishment of cell polarity and cytosol localization		AO090020000431	-4.41141	Ortholog of A. nidulans FGSC A4 : AN4705, A. fumigatus Af293 : Afu5g08712, A. niger CBS 513.88 : An07g04770, Aspergillus wentii : Aspwe1_0035214 and Aspergillus sydowii : Aspsy1_0155251
AO090012000982	5.96368	Ortholog of A. nidulans FGSC A4 : AN5141, A. fumigatus Af293 : Afu1g07280, A. niger CBS 513.88 : An07g09830, Aspergillus wentii : Aspwe1_0172497 and Aspergillus sydowii : Aspsy1_0033440		AO090003001520	-4.43088	Ortholog(s) have drug transmembrane transporter activity and role in cellular response to biotic stimulus, drug transmembrane transport, fluconazole transport, peptide transport, spermidine transport
AO090005000645	5.97951	Ortholog of A. nidulans FGSC A4 : AN10211, A. fumigatus Af293 : Afu8g04970, A. niger CBS 513.88 : An16g07840, Neosartorya fischeri NRRL 181 : NFIA_097780 and Aspergillus clavatus NRRL 1 : ACLA_058370		AO090002000160	-4.43482	Has domain(s) with predicted NADH dehydrogenase (ubiquinone) activity and role in ATP synthesis coupled electron transport
AO090005001639	6.01697	Ortholog of A. nidulans FGSC A4 : AN1391, A. fumigatus Af293 : Afu1g08870, A. niger CBS 513.88 : An08g00360, Aspergillus wentii : Aspwe1_0106441 and Aspergillus sydowii : Aspsy1_0141722		AO090038000432	-4.455	protein of unknown function
AO090001000582	6.04248	Feruloyl esterase		AO090012000230	-4.50877	Ortholog of A. nidulans FGSC A4 : AN9067/tinC, AN2167/hetC, A. fumigatus Af293 : Afu2g15840, Afu7g02570, A. niger CBS 513.88 : An15g06140 and A. oryzae RIB40 : AO090038000633
AO090701000380	6.04584	Ortholog(s) have 5-formyluracil DNA N-glycosylase activity, 5-hydroxymethyluracil DNA N-glycosylase activity, 8-oxo-7,8-dihydroguanine DNA N-glycosylase activity, role in base-excision repair, AP site formation and nucleus localization		AO090012000718	-4.52763	Ortholog(s) have GTPase activator activity
AO090020000423	6.05478	Ortholog(s) have fungal-type vacuole localization		AO090005000503	-4.533	Has domain(s) with predicted DNA binding, RNA polymerase II transcription factor activity, sequence-specific DNA binding, zinc ion binding activity and role in regulation of transcription, DNA-templated, transcription, DNA-templated
AO090023000208	6.06954	Ortholog(s) have role in cellular protein localization, signal transduction involved in mitotic spindle assembly checkpoint and bub1-bub3 complex, condensed nuclear chromosome kinetochore, nucleoplasm localization		AO090003000055	-4.56104	Enolase with a predicted role in glycolysis
AO090120000252	6.10724	protein of unknown function		AO090701000749	-4.56606	Ortholog(s) have intracellular localization
AO090009000176	6.12108	Ortholog(s) have role in actin cortical patch assembly, actin cortical patch internalization, endocytosis, protein localization to actin cortical patch, regulation of actin cortical patch localization		AO090020000490	-4.58275	Ortholog(s) have fungal-type vacuole localization
AO090005001480	6.12355	Ortholog(s) have phosphatidylinositol binding activity and cytosol, mitochondrion, nucleus localization		AO090120000328	-4.607	protein of unknown function
AO090020000218	6.12432	Ortholog(s) have protein histidine kinase activity and role in peptidyl-histidine autophosphorylation		AO090005000425	-4.62747	Ortholog of A. nidulans FGSC A4 : AN6716, A. fumigatus Af293 : Afu7g05630, A. niger CBS 513.88 : An07g02280, Aspergillus wentii : Aspwe1_0099516 and Aspergillus sydowii : Aspsy1_0447108
AO090003001351	6.13278	Has domain(s) with predicted DNA binding, chromatin binding activity		AO090012000175	-4.64214	Ortholog(s) have role in chromatin remodeling and Ino80 complex, cytosol localization
AO090023000869	6.17436	Ortholog(s) have cytosol, nucleus localization		AO090012000732	-4.64864	Ortholog(s) have fungal-type vacuole membrane localization
AO090102000573	6.25204	Ortholog(s) have ion channel activity, membrane insertase activity, mitochondrial ribosome binding activity		AO090003000982	-4.68943	Ortholog of A. nidulans FGSC A4 : AN4049, A. fumigatus Af293 : Afu1g03630, Afu5g10010, A. niger CBS 513.88 : An18g04070, Aspergillus wentii : Aspwe1_0169327 and Aspergillus sydowii : Aspsy1_0150461
AO090012000370	6.25317	protein of unknown function		AO090012000643	-4.69113	Ortholog of A. nidulans FGSC A4 : AN0995, A. fumigatus Af293 : Afu1g12700, Aspergillus wentii : Aspwe1_0051357, Aspergillus sydowii : Aspsy1_0083776 and Aspergillus terreus NIH2624 : ATET_00461
AO090026000667	6.31213	Ortholog(s) have role in cellular protein localization, mitotic actomyosin contractile ring assembly and actomyosin contractile ring, cytosol, nucleus, polysome localization		AO090011000548	-4.70011	Ortholog(s) have ATP-dependent 3'-5' DNA helicase activity, bubble DNA binding activity
AO090011000897	6.32308	Has domain(s) with predicted DNA binding, RNA polymerase II transcription factor activity, sequence-specific DNA binding, zinc ion binding activity and role in regulation of transcription, DNA-templated, transcription, DNA-templated		AO090023000677	-4.7088	Ortholog of A. nidulans FGSC A4 : AN11887, A. fumigatus Af293 : Afu4g08780, A. niger CBS 513.88 : An04g03650, Neosartorya fischeri NRRL 181 : NFIA_107380 and Aspergillus wentii : Aspwe1_0078968
AO090012000468	6.33454	Ortholog of A. nidulans FGSC A4 : AN0725, A. fumigatus Af293 : Afu1g13960, A. niger CBS 513.88 : An08g07100, Aspergillus wentii : Aspwe1_0112364 and Aspergillus sydowii : Aspsy1_0143583		AO090701000193	-4.71648	Ortholog(s) have glutathione synthase activity and role in cellular response to cadmium ion, detoxification of cadmium ion, glutathione biosynthetic process, phytochelatin biosynthetic process, phytochelatin-metal complex formation
AO090102000515	6.35878	Ortholog(s) have 5'-3' exoribonuclease activity, magnesium ion binding activity, role in RNA phosphodiester bond hydrolysis, exonucleolytic and cytoplasmic mRNA processing body, cytoplasmic stress granule, cytosol localization		AO090011000376	-4.72029	Putative metalloreductase
AO090038000248	6.36984	Ortholog of A. nidulans FGSC A4 : AN1121, A. fumigatus Af293 : Afu1g11700, A. niger CBS 513.88 : An08g03920, Aspergillus wentii : Aspwe1_0068693 and Aspergillus sydowii : Aspsy1_0038144		AO090011000553	-4.72784	Has domain(s) with predicted nucleic acid binding activity
AO090102000293	6.37379	Ortholog(s) have role in ascospore formation, conidiophore development, conidium formation, hyphal growth, sporocarp development involved in sexual reproduction and cell division site, cytosol, nucleus localization		AO090003000225	-4.72852	Ortholog(s) have Golgi apparatus, endoplasmic reticulum localization
AO090103000032	6.41998	Ortholog of A. nidulans FGSC A4 : AN1421, A. fumigatus Af293 : Afu8g04170, A. niger CBS 513.88 : An16g08920, Aspergillus wentii : Aspwe1_0043825 and Aspergillus sydowii : Aspsy1_0041969		AO090120000039	-4.7445	Ortholog(s) have nucleolus localization
AO090011000840	6.42038	Ortholog(s) have endoplasmic reticulum localization		AO090010000118	-4.7445	Ortholog of A. nidulans FGSC A4 : AN3405, A. niger CBS 513.88 : An12g02110, Aspergillus wentii : Aspwe1_0052728, Aspergillus sydowii : Aspsy1_0830408 and Aspergillus terreus NIH2624 : ATET_08660
AO090009000185	6.47733	Ortholog(s) have GTPase activator activity		AO090023000257	-4.80274	Has domain(s) with predicted role in transmembrane transport
AO090003001406	6.49956	Has domain(s) with predicted carbon-nitrogen ligase activity, with glutamine as amido-N-donor activity		AO090009000634	-4.80362	Ortholog(s) have alcohol dehydrogenase (NAD) activity
AO090009000460	6.51583	Ortholog(s) have cytosol, nucleus localization		AO090009000310	-4.80596	Ortholog of A. nidulans FGSC A4 : AN3595, A. fumigatus Af293 : Afu4g12810, A. niger CBS 513.88 : An01g08390, Aspergillus wentii : Aspwe1_0033850 and Aspergillus sydowii : Aspsy1_0032688
AO090102000343	6.53813	Na+/K+ transporter		AO090010000442	-4.80863	Has domain(s) with predicted RNA polymerase II transcription factor activity, sequence-specific DNA binding, transcription factor activity, sequence-specific DNA binding, zinc ion binding activity
AO090020000117	6.54782	Ortholog(s) have role in protein localization to kinetochore involved in kinetochore assembly and condensed nuclear chromosome, centromeric region, kinetochore, mitotic spindle pole body localization		AO090026000775	-4.82887	Monosaccharide transporter
AO090005000102	6.56042	Ortholog(s) have role in growth of symbiont in host, nitrogen utilization		AO090026000494	-4.84793	Monosugar-transporter
AO090026000787	6.59407	protein of unknown function		AO090012000596	-4.87004	Has domain(s) with predicted nutrient reservoir activity
AO090011000231	6.63974	Ortholog of A. nidulans FGSC A4 : AN8726, A. fumigatus Af293 : Afu7g00440, Afu8g06090, Afu8g06580, A. niger CBS 513.88 : An02g08340, An02g09540, An03g00430 and A. oryzae RIB40 : AO090011000243, AO090701000533		AO090012000959	-4.87004	Ortholog of A. nidulans FGSC A4 : AN5155, A. fumigatus Af293 : Afu1g07080, Neosartorya fischeri NRRL 181 : NFIA_017630, Aspergillus wentii : Aspwe1_0051657 and Aspergillus versicolor : Aspve1_0087664
AO090701000056	6.66246	Has domain(s) with predicted ATP binding activity		AO090003001591	-4.88741	Alpha-amylase involved in starch hydrolysis
AO090038000583	6.68627	Ortholog of A. fumigatus Af293 : Afu7g02060, A. niger CBS 513.88 : An12g00610, Neosartorya fischeri NRRL 181 : NFIA_114790 and Aspergillus wentii : Aspwe1_0579937		AO090003000541	-4.89978	Ortholog(s) have role in peptidyl-serine autophosphorylation, peptidyl-threonine autophosphorylation, peptidyl-tyrosine autophosphorylation, regulation of phosphorylation of RNA polymerase II C-terminal domain
AO090023000853	6.69221	Has domain(s) with predicted RNA binding activity		AO090026000733	-4.94042	Ortholog(s) have 8-oxo-dGDP phosphatase activity
AO090020000344	6.71073	Ortholog(s) have role in protein lipoylation and mitochondrion localization		AO090009000317	-4.98957	Ortholog(s) have role in nuclear migration
AO090005001663	6.73729	Ortholog(s) have transcriptional activator activity, RNA polymerase II core promoter proximal region sequence-specific binding activity		AO090103000348	-5.02754	Has domain(s) with predicted intracellular localization
AO090005001615	6.73822	Has domain(s) with predicted ATP binding, ATP-dependent helicase activity, helicase activity, nucleic acid binding activity		AO090020000280	-5.03491	Ortholog(s) have endoplasmic reticulum localization
AO090012000452	6.7422	Ortholog(s) have hyphal cell wall localization		AO090701000270	-5.04613	Ortholog of A. nidulans FGSC A4 : AN2215, A. fumigatus Af293 : Afu5g07100, A. niger CBS 513.88 : An17g00320, Aspergillus wentii : Aspwe1_0101336 and Aspergillus sydowii : Aspsy1_0139030
AO090003000247	6.76478	Has domain(s) with predicted FMN binding, catalytic activity, oxidoreductase activity and role in oxidation-reduction process		AO090038000395	-5.05422	Predicted 3-phosphoglycerate kinase with role in glycolysis
AO090020000540	6.76873	Ortholog(s) have cytoplasm localization		AO090005001538	-5.12002	Ortholog(s) have acetate transmembrane transporter activity, ammonium transmembrane transporter activity and role in ammonium transport, nitrogen utilization, plasma membrane acetate transport
AO090009000635	6.78317	Ortholog of A. nidulans FGSC A4 : AN2287, A. fumigatus Af293 : Afu5g06230, A. niger CBS 513.88 : An17g01540, Aspergillus wentii : Aspwe1_0101971 and Aspergillus sydowii : Aspsy1_0039639		AO090120000068	-5.14942	Catalase with a predicted role in hydrogen peroxide detoxification
AO090012000911	6.78853	Has domain(s) with predicted plasma membrane localization		AO090003000605	-5.20739	Ortholog of A. nidulans FGSC A4 : AN4929, A. fumigatus Af293 : Afu3g10610, A. niger CBS 513.88 : An02g06220, Aspergillus wentii : Aspwe1_0104935 and Aspergillus sydowii : Aspsy1_0147876
AO090120000290	6.80815	Ortholog(s) have role in proteasome-mediated ubiquitin-dependent protein catabolic process and cytosol, nuclear periphery localization		AO090011000862	-5.21796	Putative protein factor similar to Pfs2p involved in pre-mRNA 3&#8242
AO090701000044	6.81996	Ortholog(s) have F-bar domain binding, cytoskeletal protein binding, profilin binding activity		AO090023000807	-5.22944	Ortholog(s) have role in negative regulation of ergosterol biosynthetic process, negative regulation of hydroxymethylglutaryl-CoA reductase (NADPH) activity, positive regulation of protein phosphorylation
AO090026000571	6.83127	Has domain(s) with predicted zinc ion binding activity		AO090003000296	-5.27555	Ortholog(s) have nuclear periphery localization
AO090012000176	6.86467	Ortholog(s) have role in chromatin remodeling, regulation of chromosome segregation and Ino80 complex localization		AO090009000217	-5.29027	Has domain(s) with predicted oxidoreductase activity and role in metabolic process
AO090038000090	6.86826	Has domain(s) with predicted substrate-specific transmembrane transporter activity, transmembrane transporter activity, role in transmembrane transport and integral component of membrane, membrane localization		AO090026000820	-5.31629	Trehalose-6-phosphate synthase component with a predicted role in stress tolerance
AO090026000564	6.8748	Ortholog of A. nidulans FGSC A4 : AN2041, A. niger CBS 513.88 : An16g01460, An07g04410, An16g06600, An11g04970, An03g01890 and Neosartorya fischeri NRRL 181 : NFIA_066540, NFIA_083780		AO090701000682	-5.31649	Ortholog(s) have ferrochelatase activity, role in heme biosynthetic process and cytosol, mitochondrial inner membrane, nucleus localization
AO090012000949	6.8748	Ortholog of A. nidulans FGSC A4 : AN5163, A. fumigatus Af293 : Afu1g06970, A. niger CBS 513.88 : An07g09540, Aspergillus wentii : Aspwe1_0519616 and Aspergillus sydowii : Aspsy1_0047663		AO090003000105	-5.33654	Ortholog(s) have protein serine/threonine phosphatase activity, protein tyrosine phosphatase activity
AO090005000835	6.89165	Ortholog(s) have transcription factor activity, RNA polymerase I CORE element sequence-specific binding activity and role in regulation of transcription from RNA polymerase I promoter, transcription from RNA polymerase I promoter		AO090005000838	-5.34074	Has domain(s) with predicted ATP binding, aminoacyl-tRNA ligase activity, aspartate-tRNA ligase activity, role in aspartyl-tRNA aminoacylation, tRNA aminoacylation for protein translation and cytoplasm localization
AO090002000120	6.89484	Has domain(s) with predicted NADH dehydrogenase (ubiquinone) activity and role in ATP synthesis coupled electron transport		AO090001000414	-5.37866	Ortholog of A. nidulans FGSC A4 : AN4223, A. fumigatus Af293 : Afu1g06330, A. niger CBS 513.88 : An18g05040, Aspergillus wentii : Aspwe1_0038234 and Aspergillus sydowii : Aspsy1_0091021
AO090020000070	6.92131	Ortholog(s) have acetyltransferase activity, chromatin binding activity		AO090026000631	-5.3936	Ortholog(s) have protein serine/threonine kinase activity, role in negative regulation of glycogen biosynthetic process, protein phosphorylation, regulation of (1->6)-beta-D-glucan biosynthetic process and cytosol, nucleus localization
AO090005000131	6.92243	protein of unknown function		AO090026000440	-5.41436	Ortholog of A. nidulans FGSC A4 : AN6217, A. fumigatus Af293 : Afu2g12060, A. niger CBS 513.88 : An02g04130, Aspergillus wentii : Aspwe1_0053972 and Aspergillus sydowii : Aspsy1_0152133
AO090026000426	6.93893	Cyclic AMP-dependent protein kinase A (PKA) catalytic subunit		AO090026000850	-5.47526	Ortholog of A. nidulans FGSC A4 : AN0173, A. niger CBS 513.88 : An01g02440, Aspergillus wentii : Aspwe1_0442639, Aspergillus sydowii : Aspsy1_0027713 and Aspergillus terreus NIH2624 : ATET_07718
AO090023000717	6.96096	Ortholog(s) have calcium-independent phospholipase A2 activity, lysophosphatidic acid acyltransferase activity, sterol esterase activity, triglyceride lipase activity		AO090010000219	-5.53432	Similar to pleiotropic drug resistance proteins, ABC superfamily
AO090012000553	6.97349	Ortholog(s) have SAGA complex localization		AO090701000554	-5.54353	Heat shock protein
AO090102000136	7.00626	Ortholog(s) have role in DNA repair, attachment of spindle microtubules to kinetochore involved in homologous chromosome segregation, mitotic sister chromatid cohesion and protein localization to chromatin, more		AO090026000552	-5.54419	Ortholog(s) have RNA polymerase II C-terminal domain phosphoserine binding, RNA polymerase II core binding, chromatin binding and transcription factor activity, more
AO090005000441	7.03686	Ortholog(s) have role in establishment or maintenance of cell polarity, hyphal growth		AO090102000098	-5.59332	Putative C2H2 transcription factor
AO090011000791	7.05859	Ortholog(s) have protein-arginine N5-methyltransferase activity, role in peptidyl-arginine methylation and cytoplasm, nucleus localization		AO090001000689	-5.59726	Ortholog of A. nidulans FGSC A4 : AN7484, A. fumigatus Af293 : Afu2g05720, A. niger CBS 513.88 : An02g14170, Aspergillus wentii : Aspwe1_0046318 and Aspergillus sydowii : Aspsy1_0153479
AO090001000721	7.06807	Ortholog(s) have transcription coactivator activity, role in histone acetylation, transcription from RNA polymerase II promoter and Ada2/Gcn5/Ada3 transcription activator complex, SAGA complex, SLIK (SAGA-like) complex localization		AO090009000325	-5.61556	Ortholog(s) have role in DNA repair, intra-S DNA damage checkpoint, mitotic DNA replication checkpoint, mitotic G2 DNA damage checkpoint and checkpoint clamp complex, cytosol, site of double-strand break localization
AO090701000068	7.08052	Has domain(s) with predicted phospholipid binding activity		AO090020000530	-5.6194	Ortholog(s) have endoplasmic reticulum localization
AO090701000120	7.09076	Has domain(s) with predicted RNA binding activity		AO090023000305	-5.65951	Has domain(s) with predicted RNA polymerase II transcription factor activity, sequence-specific DNA binding, transcription factor activity, sequence-specific DNA binding, zinc ion binding activity
AO090001000552	7.09633	Ortholog(s) have nucleolus localization		AO090026000851	-5.6985	Ortholog(s) have phospholipid binding activity and cytosol, plasma membrane localization
AO090020000020	7.17913	Ortholog(s) have role in response to drug and nucleolus localization		AO090005001523	-5.71032	Ortholog of Aspergillus wentii : Aspwe1_0051576, Aspergillus versicolor : Aspve1_0132177, Aspergillus clavatus NRRL 1 : ACLA_090550 and Aspergillus niger ATCC 1015 : 209414-mRNA
AO090124000090	7.19471	Ortholog(s) have inositol heptakisphosphate kinase activity, inositol hexakisphosphate 1-kinase activity, inositol hexakisphosphate 3-kinase activity, inositol hexakisphosphate 4-kinase activity, inositol hexakisphosphate 6-kinase activity		AO090701000106	-5.74924	Ortholog(s) have role in hyphal growth, mitochondrial genome maintenance, mitochondrial outer membrane translocase complex assembly, mitochondrion-ER tethering and phospholipid transport, more
AO090001000219	7.24826	Ortholog of A. nidulans FGSC A4 : AN11021, A. fumigatus Af293 : Afu1g12580, Neosartorya fischeri NRRL 181 : NFIA_012970 and Aspergillus wentii : Aspwe1_0040414		AO090005000613	-5.75786	Ortholog(s) have cytosol, nucleus localization
AO090005000621	7.2505	Ortholog(s) have siRNA binding activity, role in conversion of ds siRNA to ss siRNA involved in RNA interference and RISC complex localization		AO090009000420	-5.7662	protein of unknown function
AO090102000609	7.25761	Ortholog(s) have ubiquitin-protein transferase activity		AO090020000057	-5.80309	protein of unknown function
AO090005000259	7.30275	Ortholog(s) have RNA binding activity, role in U2-type prespliceosome assembly, mRNA cis splicing, via spliceosome, spliceosomal tri-snRNP complex assembly and U2-type prespliceosome, U2AF, commitment complex localization		AO090103000413	-5.82347	Ortholog(s) have 1-phosphatidylinositol 4-kinase activator activity, calcium ion binding activity
AO090124000050	7.33759	Has domain(s) with predicted calcium:proton antiporter activity, role in calcium ion transport, transmembrane transport and integral component of membrane localization		AO090120000318	-5.85493	Ortholog(s) have cytosol, nucleus localization
AO090701000421	7.35878	Ortholog(s) have methionine-R-sulfoxide reductase activity, role in cellular response to oxidative stress and cytoplasm, nucleus localization		AO090011000152	-5.96174	Ortholog(s) have sedoheptulose-bisphosphatase activity, role in ribose phosphate biosynthetic process and cytoplasm, nucleus localization
AO090120000399	7.4648	Ortholog(s) have role in posttranscriptional gene silencing, production of small RNA involved in gene silencing by RNA		AO090023000648	-5.99145	protein of unknown function
AO090005000860	7.51798	Has domain(s) with predicted catalytic activity and role in metabolic process		AO090020000259	-6.03039	Ortholog(s) have fructose:proton symporter activity, high-affinity hydrogen:glucose symporter activity, mannose transmembrane transporter activity
AO090003000446	7.52791	Ortholog of A. nidulans FGSC A4 : AN5490, A. niger CBS 513.88 : An08g10190, Aspergillus versicolor : Aspve1_0053274, Aspergillus niger ATCC 1015 : 37923-mRNA and Aspergillus sydowii : Aspsy1_0150005		AO090020000652	-6.05061	Ortholog of A. nidulans FGSC A4 : AN2649, A. fumigatus Af293 : Afu1g01190, A. niger CBS 513.88 : An11g03730, Aspergillus wentii : Aspwe1_0741100 and Aspergillus sydowii : Aspsy1_0134175
AO090023000802	7.54441	Ortholog(s) have cytoplasm localization		AO090026000810	-6.06343	Ortholog(s) have transcription factor activity, sequence-specific DNA binding, transcription regulatory region DNA binding activity
AO090311000001	7.54782	Ortholog of A. nidulans FGSC A4 : AN9057, A. fumigatus Af293 : Afu7g02600, A. niger CBS 513.88 : An09g03040, Aspergillus wentii : Aspwe1_0052567 and Aspergillus sydowii : Aspsy1_0049967		AO090020000395	-6.08381	Phosphoribosylaminoimidazole-succinocarboxamidesynthase with a predicted role in purine nucleotide biosynthesis
AO090701000102	7.59144	Ortholog(s) have DNA replication origin binding, ubiquitin protein ligase activity, ubiquitin-protein transferase activity		AO090009000407	-6.16422	Ortholog of A. nidulans FGSC A4 : AN4062, A. fumigatus Af293 : Afu1g05370, A. niger CBS 513.88 : An18g04210, Aspergillus wentii : Aspwe1_0104515 and Aspergillus sydowii : Aspsy1_0057614
AO090005000457	7.66459	Metalloendopeptidase		AO090026000711	-6.19146	Ortholog of A. nidulans FGSC A4 : AN0172, A. fumigatus Af293 : Afu5g11310, A. niger CBS 513.88 : An01g02460, Aspergillus wentii : Aspwe1_0442534 and Aspergillus sydowii : Aspsy1_0027712
AO090005000629	7.67194	Ortholog(s) have peroxisome matrix targeting signal-1 binding, peroxisome matrix targeting signal-2 binding, protein binding, bridging activity and role in fatty acid metabolic process, protein import into peroxisome matrix, docking		AO090701000002	-6.2125	Predicted aspartic-type endopeptidase
AO090011000491	7.67396	Ortholog(s) have nuclear periphery, nucleus localization		AO090026000327	-6.23109	Has domain(s) with predicted RNA binding activity
AO090038000301	7.69364	Ortholog(s) have role in ascospore formation, cell growth mode switching, monopolar to bipolar, conidiophore development, conidium formation and establishment or maintenance of actin cytoskeleton polarity, more		AO090005001356	-6.23574	Ortholog of A. nidulans FGSC A4 : AN3028, A. fumigatus Af293 : Afu3g08860, A. niger CBS 513.88 : An16g02480, Aspergillus wentii : Aspwe1_0041794 and Aspergillus sydowii : Aspsy1_0077129
AO090012000538	7.69792	Ortholog of A. nidulans FGSC A4 : AN0678, Neosartorya fischeri NRRL 181 : NFIA_012100, Aspergillus wentii : Aspwe1_0171976 and Aspergillus versicolor : Aspve1_0048929		AO090005001572	-6.25397	Ortholog(s) have receptor activity, role in ER to Golgi vesicle-mediated transport, ascospore formation, axial cellular bud site selection and ER to Golgi transport vesicle, endoplasmic reticulum membrane localization
AO090005000665	7.69924	Has domain(s) with predicted ribonuclease activity and role in tRNA processing		AO090009000502	-6.27754	Sequence-specific DNA binding transcription regulatory protein
AO090003000675	7.81032	Ortholog(s) have Rab GTPase binding, phosphatidylinositol binding activity		AO090001000738	-6.27943	Ortholog of A. fumigatus Af293 : Afu2g06205, A. niger CBS 513.88 : An02g14850, Aspergillus wentii : Aspwe1_0028348, Aspergillus clavatus NRRL 1 : ACLA_068110 and Aspergillus niger ATCC 1015 : 175113-mRNA
AO090003000445	7.81559	Ortholog(s) have role in CVT pathway, autophagosome assembly, late nucleophagy, mitophagy, pexophagy, piecemeal microautophagy of nucleus, reticulophagy and extrinsic component of membrane, pre-autophagosomal structure localization		AO090011000449	-6.30508	Chitin synthase
AO090026000688	7.8748	Ortholog(s) have chromatin binding, protein complex scaffold activity and role in RNA polymerase II transcriptional preinitiation complex assembly, histone acetylation		AO090003000980	-6.30744	Ortholog of A. nidulans FGSC A4 : AN4026, A. fumigatus Af293 : Afu1g03650, A. niger CBS 513.88 : An18g04060, Aspergillus wentii : Aspwe1_0169329 and Aspergillus sydowii : Aspsy1_0149715
AO090001000308	7.9146	Has domain(s) with predicted transferase activity, transferring glycosyl groups activity and membrane localization		AO090026000255	-6.37509	Ortholog(s) have potassium ion transmembrane transporter activity
AO090026000421	7.98288	Ortholog(s) have copper ion binding activity, role in aerobic respiration, protein complex assembly and mitochondrial inner membrane, mitochondrial intermembrane space, mitochondrial ribosome, plasma membrane localization		AO090124000004	-6.38081	Ortholog(s) have role in filamentous growth, proline catabolic process
AO090005000807	7.98639	Ortholog(s) have SAGA complex, cytosol, transcription factor TFIID complex localization		AO090003000701	-6.42523	Ortholog of A. nidulans FGSC A4 : AN2898, A. fumigatus Af293 : Afu3g11460, A. niger CBS 513.88 : An02g07300, Aspergillus wentii : Aspwe1_0105666 and Aspergillus sydowii : Aspsy1_0146871
AO090038000531	7.99105	Ortholog(s) have role in calcium ion transmembrane import into cytosol and Golgi apparatus, cytosol, extracellular region localization		AO090038000280	-6.54156	Ortholog of A. nidulans FGSC A4 : AN1156, A. fumigatus Af293 : Afu1g11450, A. niger CBS 513.88 : An08g03570, Aspergillus wentii : Aspwe1_0068767 and Aspergillus sydowii : Aspsy1_0191007
AO090003000716	8.03767	Ortholog of A. nidulans FGSC A4 : AN2889, A. fumigatus Af293 : Afu3g11570, A. niger CBS 513.88 : An02g07370, Aspergillus wentii : Aspwe1_0037047 and Aspergillus sydowii : Aspsy1_0029412		AO090023000502	-6.61599	Ortholog(s) have fungal-type vacuole membrane localization
AO090038000350	8.07028	Ortholog(s) have role in proteasome regulatory particle assembly, proteolysis and cytosol, nucleus, proteasome regulatory particle localization		AO090005001584	-6.62577	Putative G-protein coupled receptor
AO090011000619	8.07248	Ortholog(s) have cytosol, nucleus localization		AO090011000119	-6.63696	Ortholog(s) have fungal-type cell wall localization
AO090005000647	8.07687	Ortholog(s) have cell division site, cytosol, nucleus localization		AO090003001390	-6.65054	Predicted phosphofructokinase subunit with role in glycolysis
AO090701000175	8.10323	Ortholog(s) have role in propionate metabolic process and mitochondrial outer membrane localization		AO090001000758	-6.66589	Ortholog(s) have histone demethylase activity (H3-K36 specific) activity and role in histone demethylation, regulation of transcription from RNA polymerase II promoter
AO090003001391	8.10724	Ortholog(s) have activating transcription factor binding, structural molecule activity, transcription factor activity, core RNA polymerase II recruiting activity		AO090003000427	-6.69069	Ortholog(s) have protein binding, bridging, ubiquitin-protein transferase activity
AO090026000011	8.11723	Has domain(s) with predicted nucleotide binding, oxidoreductase activity and role in oxidation-reduction process		AO090003000594	-6.72802	Ortholog(s) have role in reciprocal meiotic recombination and endoplasmic reticulum, mitochondrion, nuclear envelope, plasma membrane localization
AO090701000281	8.14956	Ortholog(s) have cyclin-dependent protein serine/threonine kinase regulator activity and role in phosphorylation of RNA polymerase II C-terminal domain, transcription from RNA polymerase II promoter		AO090102000166	-6.75961	Putative polyketide synthase (PKS), encoded in a predicted secondary metabolite gene cluster
AO090023000590	8.16693	Ortholog(s) have calcium-transporting ATPase activity, potassium-transporting ATPase activity and role in calcium ion transmembrane transport, hyphal growth, potassium ion export across plasma membrane, sequestering of calcium ion		AO090012000247	-6.76081	protein of unknown function
AO090011000940	8.17763	Ortholog(s) have aminopeptidase activity, epoxide hydrolase activity, role in cellular lipid metabolic process, protein catabolic process and cytosol, extracellular region, nucleus localization		AO090003001045	-6.79495	Ortholog(s) have role in glycerol metabolic process, intracellular accumulation of glycerol and intracellular localization
AO090005000116	8.20838	Ortholog(s) have protein serine/threonine kinase activity and role in mitotic DNA replication checkpoint, peptidyl-serine autophosphorylation, peptidyl-threonine autophosphorylation, positive regulation of DNA replication initiation		AO090701000738	-6.80956	Ortholog of A. nidulans FGSC A4 : AN11006, A. fumigatus Af293 : Afu5g08200, A. niger CBS 513.88 : An03g04400, Aspergillus wentii : Aspwe1_0048123 and Aspergillus sydowii : Aspsy1_0046266
AO090038000616	8.22865	Ortholog(s) have role in histone exchange, regulation of phenotypic switching by regulation of transcription from RNA polymerase II promoter and Swr1 complex localization		AO090102000597	-6.84477	Ortholog(s) have transcription coactivator activity, transcription regulatory region DNA binding activity
AO090012000084	8.23421	Chitin synthase		AO090001000445	-6.90864	Cytochrome P450 monooxygenase
AO090113000014	8.27258	Ortholog(s) have role in cellular response to biotic stimulus, filamentous growth of a population of unicellular organisms in response to biotic stimulus, hyphal growth, vacuole inheritance		AO090003000432	-6.96455	Ortholog(s) have UDP-galactose transmembrane transporter activity, role in UDP-galactose transmembrane import into Golgi lumen and integral component of Golgi membrane localization
AO090003000683	8.32014	Ortholog(s) have gamma-tubulin binding activity and role in cytoplasmic microtubule organization, establishment or maintenance of cell polarity regulating cell shape, mitotic spindle assembly		AO090120000347	-7.00446	Ortholog of A. nidulans FGSC A4 : AN0073, A. fumigatus Af293 : Afu5g12302, A. niger CBS 513.88 : An01g02110, Aspergillus wentii : Aspwe1_0170763 and Aspergillus sydowii : Aspsy1_0195064
AO090020000203	8.32872	Has domain(s) with predicted transferase activity, transferring glycosyl groups activity and membrane localization		AO090120000100	-7.01231	Has domain(s) with predicted aspartic-type endopeptidase activity and integral component of membrane localization
AO090020000067	8.34913	Ortholog(s) have cytosol localization		AO090020000412	-7.02654	Ortholog of A. nidulans FGSC A4 : AN4866, A. fumigatus Af293 : Afu3g07720, Aspergillus wentii : Aspwe1_0173493, Aspergillus sydowii : Aspsy1_0056549 and Aspergillus carbonarius ITEM 5010 : Acar5010_204121
AO090003000960	8.37967	Ortholog(s) have Golgi apparatus, endoplasmic reticulum localization		AO090102000487	-7.05326	SNAP-25
AO090011000544	8.38594	Has domain(s) with predicted zinc ion binding activity		AO090003000754	-7.06643	Has domain(s) with predicted zinc ion binding activity
AO090003000887	8.40841	Ortholog(s) have nucleolus localization		AO090102000148	-7.06762	mitochondrial carrier protein
AO090009000597	8.44455	Ortholog(s) have role in protein folding in endoplasmic reticulum and integral component of endoplasmic reticulum membrane localization		AO090102000561	-7.07712	Ortholog(s) have intracellular localization
AO090012000394	8.44511	Ortholog(s) have cytosol localization		AO090023000633	-7.08315	Ortholog(s) have role in purine nucleobase catabolic process
AO090003000789	8.50609	Ortholog(s) have protein serine/threonine phosphatase activity, protein tyrosine/serine/threonine phosphatase activity		AO090005000136	-7.1712	Ortholog(s) have mitochondrion localization
AO090102000378	8.54218	protein of unknown function		AO090701000151	-7.18795	Has domain(s) with predicted role in cell cycle arrest
AO090003001124	8.55548	Ortholog(s) have role in cellular response to UV, cellular response to hydrogen peroxide, conidiophore development, conidium formation and negative regulation of conidiophore development, more		AO090005000419	-7.27376	Ortholog(s) have Golgi apparatus, endoplasmic reticulum localization
AO090701000158	8.58529	Catalase with a predicted role in hydrogen peroxide detoxification		AO090011000944	-7.2977	Sequence-specific DNA binding transcription factor
AO090206000133	8.61579	Ortholog(s) have role in conidium formation, response to heat		AO090120000497	-7.35116	Ortholog(s) have U1 snRNP, cytosol localization
AO090003000664	8.63677	Ortholog(s) have role in mitochondrial respiratory chain complex III assembly and integral component of mitochondrial inner membrane localization		AO090701000116	-7.3936	Has domain(s) with predicted phosphoric diester hydrolase activity, role in DNA repair and nucleus localization
AO090026000701	8.7511	Ortholog(s) have role in asymmetric protein localization to old mitotic spindle pole body, glycogen metabolic process, negative regulation of septation initiation signaling, syncytium formation by plasma membrane fusion		AO090102000099	-7.42667	Ortholog of A. nidulans FGSC A4 : AN7248, A. fumigatus Af293 : Afu2g17200, A. niger CBS 513.88 : An04g09270, Aspergillus wentii : Aspwe1_0153703 and Aspergillus sydowii : Aspsy1_0140330
AO090023000857	8.80239	Ortholog of A. fumigatus Af293 : Afu4g07180, A. niger CBS 513.88 : An04g01590, Aspergillus wentii : Aspwe1_0247174, Aspergillus sydowii : Aspsy1_0548380 and Aspergillus terreus NIH2624 : ATET_05493		AO090003001067	-7.50693	Ortholog(s) have glycerol kinase activity and role in glycerol metabolic process
AO090003000208	8.8455	4-hydroxyphenylpyruvate dioxygenase		AO090023000727	-7.54412	Ortholog(s) have misfolded RNA binding, tyrosine-tRNA ligase activity, role in Group I intron splicing, RNA folding, mitochondrial tyrosyl-tRNA aminoacylation and mitochondrion localization
AO090103000485	8.92925	Ortholog of A. nidulans FGSC A4 : AN3299, A. fumigatus Af293 : Afu2g00590, A. niger CBS 513.88 : An07g01100, Aspergillus wentii : Aspwe1_0026517 and Aspergillus sydowii : Aspsy1_0029988		AO090023000067	-7.58275	Ortholog of A. nidulans FGSC A4 : AN6460, AN12398, A. oryzae RIB40 : AO090010000683, Aspergillus wentii : Aspwe1_0075588, Aspergillus versicolor : Aspve1_0086685 and Aspergillus zonatus : Aspzo1_1970012
AO090003000915	8.93329	Ortholog(s) have role in cellular response to biotic stimulus, cellular response to starvation and filamentous growth of a population of unicellular organisms in response to biotic stimulus, more		AO090206000051	-7.58428	Ortholog(s) have role in chromatin silencing at telomere, histone exchange and Swr1 complex, cytosol, nuclear chromosome, telomeric region localization
AO090103000044	8.95285	Ortholog(s) have protein transporter activity, role in filamentous growth, posttranslational protein targeting to membrane, translocation and Sec62/Sec63 complex localization		AO090003001565	-7.59796	Ortholog of A. nidulans FGSC A4 : AN10235, A. fumigatus Af293 : Afu2g04400, A. niger CBS 513.88 : An11g03330, Aspergillus wentii : Aspwe1_0120274 and Aspergillus terreus NIH2624 : ATET_06071
AO090038000528	8.97493	Ortholog(s) have cytoplasm, nucleus localization		AO090010000746	-7.62369	Glucoamylase
AO090026000133	8.98872	Ortholog(s) have protein binding, bridging, ubiquitin binding activity		AO090023000957	-7.63269	Ortholog of A. nidulans FGSC A4 : AN4341, A. fumigatus Af293 : Afu4g06330, A. niger CBS 513.88 : An04g00660, Aspergillus wentii : Aspwe1_0047852 and Aspergillus sydowii : Aspsy1_0036623
AO090026000431	9.03573	Ortholog(s) have role in rRNA processing, ribosomal large subunit assembly and mitochondrion, mitotic spindle pole body, nucleoplasm, preribosome, large subunit precursor localization		AO090005000270	-7.69007	Has domain(s) with predicted zinc ion binding activity
AO090038000429	9.06255	Ortholog of A. nidulans FGSC A4 : AN11935, A. fumigatus Af293 : Afu1g10060, Aspergillus wentii : Aspwe1_0168733, Aspergillus sydowii : Aspsy1_0126887 and Aspergillus terreus NIH2624 : ATET_00179		AO090010000102	-7.74723	Ortholog of A. nidulans FGSC A4 : AN8900, A. fumigatus Af293 : Afu7g01180, A. niger CBS 513.88 : An09g02270, Aspergillus wentii : Aspwe1_0136662 and Aspergillus sydowii : Aspsy1_0212118
AO090020000332	9.08016	Ortholog of A. nidulans FGSC A4 : AN4779, A. fumigatus Af293 : Afu3g06660, A. niger CBS 513.88 : An11g09650, Aspergillus wentii : Aspwe1_0173599 and Aspergillus sydowii : Aspsy1_0087834		AO090012000556	-7.75035	Ortholog(s) have cytosol localization
AO090009000292	9.13278	Ortholog(s) have phosphatidylinositol-3-phosphate binding activity and role in CVT pathway, early endosome to Golgi transport, mitophagy, piecemeal microautophagy of nucleus		AO090012000270	-7.7508	Has domain(s) with predicted DNA-directed RNA polymerase activity, role in transcription, DNA-templated and nucleus localization
AO090009000669	9.14747	Has domain(s) with predicted aminoacyl-tRNA hydrolase activity		AO090001000428	-7.75087	Ortholog(s) have cytosol, nucleus localization
AO090102000248	9.19471	Ortholog(s) have cytosol localization		AO090102000102	-7.75957	Ortholog(s) have potassium:proton antiporter activity, sodium:proton antiporter activity
AO090038000609	9.23456	Ortholog of A. fumigatus Af293 : Afu7g02300, A. niger CBS 513.88 : An12g00330, Aspergillus wentii : Aspwe1_0029503 and Aspergillus sydowii : Aspsy1_0161249		AO090005000796	-7.84193	Ortholog of A. nidulans FGSC A4 : AN9448, A. fumigatus Af293 : Afu1g03030, Aspergillus wentii : Aspwe1_0169602, Aspergillus sydowii : Aspsy1_0628822 and Aspergillus terreus NIH2624 : ATET_01955
AO090120000179	9.32226	Ortholog(s) have isocitrate lyase activity, methylisocitrate lyase activity, role in propionate catabolic process, 2-methylcitrate cycle and mitochondrial matrix localization		AO090120000492	-7.97972	Ortholog of A. nidulans FGSC A4 : AN6899, A. niger CBS 513.88 : An14g04910, Aspergillus wentii : Aspwe1_0170883, Aspergillus sydowii : Aspsy1_0040365 and Aspergillus terreus NIH2624 : ATET_06164
AO090012001024	9.34428	Ortholog(s) have FACT complex, mitotic spindle pole body localization		AO090023000487	-7.98274	Ortholog(s) have role in conidiophore development
AO090003000996	9.50161	Ortholog(s) have NAD+ binding, NAD-dependent histone deacetylase activity (H3-K9 specific), NAD-dependent histone deacetylase activity (H4-K16 specific) and histone deacetylase activity (H3-K14 specific), more		AO090009000347	-7.98916	Ortholog(s) have MAP kinase kinase activity, protein tyrosine kinase activity, structural constituent of cell wall activity
AO090138000215	9.53191	Ortholog(s) have role in poly(A)+ mRNA export from nucleus and cytosol, nuclear periphery, nuclear pore outer ring, spindle pole body localization		AO090102000402	-8.01105	Has domain(s) with predicted DNA binding, RNA polymerase II transcription factor activity, sequence-specific DNA binding, zinc ion binding activity and role in regulation of transcription, DNA-templated, transcription, DNA-templated
AO090026000622	9.54306	Ortholog(s) have role in regulation of spore germination		AO090005001475	-8.07122	Ortholog(s) have RNA polymerase II transcription coactivator activity involved in preinitiation complex assembly, RNA polymerase II transcription factor activity and sequence-specific DNA binding, more
AO090701000575	9.5494	Putative O-methyltransferase		AO090023000371	-8.08597	Ortholog of A. nidulans FGSC A4 : AN8602, A. fumigatus Af293 : Afu2g00500, Afu6g09865, Neosartorya fischeri NRRL 181 : NFIA_032690, NFIA_055590 and Aspergillus versicolor : Aspve1_0031494
AO090003001226	9.59451	Has domain(s) with predicted RNA polymerase II transcription cofactor activity, role in regulation of transcription from RNA polymerase II promoter and mediator complex localization		AO090103000333	-8.09243	Ortholog(s) have guanyl-nucleotide exchange factor activity, role in mature ribosome assembly and cytosol, nucleolus, polysome, preribosome, large subunit precursor localization
AO090701000763	9.60215	Ortholog(s) have MAP-kinase scaffold activity, osmosensor activity		AO090012000766	-8.10525	Ortholog(s) have role in fatty acid catabolic process
AO090701000032	9.62632	Ortholog(s) have role in posttranslational protein targeting to membrane, protein insertion into ER membrane and TRC complex, nucleus localization		AO090009000236	-8.10632	protein of unknown function
AO090003000195	9.66037	Ortholog(s) have Golgi apparatus, endoplasmic reticulum localization		AO090701000268	-8.11796	Ortholog of Aspergillus flavus NRRL 3357 : AFL2T_05907
AO090011000264	9.72615	Ortholog(s) have role in sporocarp development involved in sexual reproduction		AO090005000579	-8.12679	Ortholog(s) have chitin synthase activity
AO090120000165	9.74559	Has domain(s) with predicted catalytic activity, oxidoreductase activity		AO090701000739	-8.15698	Ortholog(s) have dolichyl-phosphate beta-glucosyltransferase activity and endoplasmic reticulum membrane localization
AO090120000270	9.76341	Ortholog of A. nidulans FGSC A4 : AN4511, A. fumigatus Af293 : Afu2g03160, A. niger CBS 513.88 : An07g07590, Aspergillus wentii : Aspwe1_0111310 and Aspergillus sydowii : Aspsy1_0163279		AO090103000009	-8.28559	Has domain(s) with predicted DNA binding, RNA polymerase II transcription factor activity, sequence-specific DNA binding, zinc ion binding activity and role in regulation of transcription, DNA-templated, transcription, DNA-templated
AO090026000347	9.76478	Ortholog(s) have role in negative regulation of G0 to G1 transition		AO090005001073	-8.2935	Ortholog(s) have protein complex binding activity
AO090124000082	9.77697	Ortholog(s) have tRNA (guanine-N2-)-methyltransferase activity, role in tRNA N2-guanine methylation and mitochondrion, nucleus localization		AO090206000070	-8.34962	Ortholog of A. nidulans FGSC A4 : AN7026, A. fumigatus Af293 : Afu4g04230, A. niger CBS 513.88 : An14g00600, Aspergillus wentii : Aspwe1_0030288 and Aspergillus sydowii : Aspsy1_0092867
AO090003000421	9.89794	Ortholog(s) have microtubule plus-end binding activity		AO090020000524	-8.40055	Has domain(s) with predicted transporter activity, role in transport and membrane localization
AO090005000093	9.90277	Ortholog(s) have endoplasmic reticulum localization		AO090120000230	-8.45165	Ortholog(s) have role in cellular response to drug, secondary metabolite biosynthetic process
AO090701000029	9.9256	Ortholog(s) have microtubule binding activity, role in protein urmylation, regulation of transcription from RNA polymerase II promoter, tRNA wobble uridine modification and Elongator holoenzyme complex, cytosol, nucleus localization		AO090026000365	-8.53164	Has domain(s) with predicted role in transmembrane transport and integral component of membrane localization
AO090038000382	9.9782	Ortholog of A. nidulans FGSC A4 : AN1233, A. fumigatus Af293 : Afu1g10450, A. niger CBS 513.88 : An08g02400, Aspergillus wentii : Aspwe1_0036589 and Aspergillus sydowii : Aspsy1_0025514		AO090001000700	-8.5528	Ortholog of A. nidulans FGSC A4 : AN7470, A. fumigatus Af293 : Afu2g05810, A. niger CBS 513.88 : An02g14540, Neosartorya fischeri NRRL 181 : NFIA_082530 and Aspergillus wentii : Aspwe1_0120676
AO090003001452	10.0061	Ortholog of A. nidulans FGSC A4 : AN3773, Aspergillus flavus NRRL 3357 : AFL2T_01630, Aspergillus wentii : Aspwe1_0068031 and Aspergillus versicolor : Aspve1_0083991, Aspve1_0118939		AO090026000830	-8.66445	Ortholog(s) have DNA binding, RNA polymerase II activity, RNA-directed RNA polymerase activity, role in termination of RNA polymerase II transcription and DNA-directed RNA polymerase II, core complex, cytosol localization
AO090005001250	10.0261	Ortholog(s) have role in ascospore formation, cell septum assembly, conidium formation, hyphal growth, response to fungicide, response to salt stress, sporocarp development involved in sexual reproduction		AO090020000430	-8.71761	Ortholog(s) have role in asexual sporulation resulting in formation of a cellular spore, mitotic cytokinesis, nuclear migration during mitotic telophase, septin ring assembly
AO090012001002	10.0425	Putative protein factor similar to Pcf11p involved in pre-mRNA 3&#8242		AO090005001507	-8.7486	Ortholog(s) have lipid binding activity
AO090103000347	10.0436	Ortholog(s) have DNA topoisomerase type II (ATP-hydrolyzing) activity and role in DNA topological change, chromatin organization, mitotic sister chromatid separation, resolution of meiotic recombination intermediates		AO090102000608	-8.77291	Ortholog(s) have mitochondrion localization
AO090012000155	10.0458	Ortholog(s) have protein serine/threonine phosphatase activity		AO090003001272	-8.81572	Ortholog of A. nidulans FGSC A4 : AN1846, A. fumigatus Af293 : Afu4g09670, Aspergillus wentii : Aspwe1_0102762, Aspergillus sydowii : Aspsy1_0026263 and Aspergillus terreus NIH2624 : ATET_00776
AO090102000233	10.0592	Ortholog(s) have endoplasmic reticulum localization		AO090009000312	-8.87254	Ortholog(s) have methylthioribulose 1-phosphate dehydratase activity, role in L-methionine biosynthetic process from methylthioadenosine and cytosol, nucleus localization
AO090023000434	10.0741	Has domain(s) with predicted nucleic acid binding, nucleotide binding activity		AO090102000336	-8.93971	Has domain(s) with predicted catalytic activity
AO090011000890	10.1183	Has domain(s) with predicted DNA binding, RNA polymerase II transcription factor activity, sequence-specific DNA binding, zinc ion binding activity and role in regulation of transcription, DNA-templated, transcription, DNA-templated		AO090003000666	-8.95123	Has domain(s) with predicted carboxy-lyase activity, catalytic activity, pyridoxal phosphate binding activity and role in carboxylic acid metabolic process
AO090206000079	10.1937	Ortholog(s) have chitin synthase activity		AO090005000109	-9.00161	Ortholog of A. nidulans FGSC A4 : AN5683, A. fumigatus Af293 : Afu7g04240, Aspergillus wentii : Aspwe1_0026296, Aspergillus sydowii : Aspsy1_0043760 and Aspergillus terreus NIH2624 : ATET_04304
AO090012000193	10.2048	Ortholog(s) have cytosol, nucleus localization		AO090005001429	-9.02598	Ortholog of A. nidulans FGSC A4 : AN2979, A. fumigatus Af293 : Afu3g08450, A. niger CBS 513.88 : An02g12090, Aspergillus wentii : Aspwe1_0551961 and Aspergillus sydowii : Aspsy1_0056256
AO090023000222	10.2168	Ortholog(s) have SUMO activating enzyme activity, role in protein sumoylation and nucleus localization		AO090023000682	-9.09082	Ortholog(s) have 3-deoxy-7-phosphoheptulonate synthase activity
AO090023000907	10.2753	Ortholog(s) have DNA-1,N6-ethenoadenine N-glycosylase activity, DNA-3-methyladenine glycosylase activity, DNA-7-methylguanine glycosylase activity, alkylated DNA binding activity		AO090011000043	-9.09243	Putative nonribosomal peptide synthase (NRPS), encoded in a predicted secondary metabolite gene cluster
AO090012000581	10.2791	Ortholog(s) have anthranilate synthase activity, glyceraldehyde-3-phosphate dehydrogenase (NAD+) (phosphorylating) activity and indole-3-glycerol-phosphate lyase activity, more		AO090011000956	-9.13526	Ortholog(s) have role in cleistothecium development and COP9 signalosome localization
AO090038000568	10.322	Ortholog(s) have DNA binding, DNA-directed RNA polymerase activity, RNA binding activity and role in chromatin silencing by small RNA, transcription from RNA polymerase II promoter		AO090124000051	-9.13786	Has domain(s) with predicted calcium:proton antiporter activity, role in calcium ion transport, transmembrane transport and integral component of membrane localization
AO090103000444	10.3579	Has domain(s) with predicted hydrolase activity and role in nucleotide catabolic process		AO090011000101	-9.20989	Cytochrome P450 monooxygenase
AO090003000562	10.3731	Has domain(s) with predicted DNA binding, RNA polymerase II transcription factor activity, sequence-specific DNA binding, zinc ion binding activity and role in regulation of transcription, DNA-templated, transcription, DNA-templated		AO090011000820	-9.21518	Ortholog(s) have L-aspartate transmembrane transporter activity, L-glutamate transmembrane transporter activity and role in L-aspartate transport, L-glutamate transport, cellular response to drug
AO090023000946	10.3838	Has domain(s) with predicted DNA binding, RNA polymerase II transcription factor activity, sequence-specific DNA binding, zinc ion binding activity and role in regulation of transcription, DNA-templated, transcription, DNA-templated		AO090012000472	-9.23927	protein of unknown function
AO090003000217	10.3856	Cytochrome P450 monooxygenase		AO090005000973	-9.25003	Ortholog(s) have glutathione peroxidase activity, glutathione transferase activity, role in glutathione metabolic process and endoplasmic reticulum, mitochondrial outer membrane, plasma membrane localization
AO090003000808	10.4081	Ortholog(s) have endoplasmic reticulum localization		AO090003000304	-9.28319	Ortholog(s) have role in Golgi to endosome transport, cell morphogenesis, cleistothecium development, conidium formation and endoplasmic reticulum organization, more
AO090113000114	10.5351	Ortholog(s) have nucleus localization		AO090011000825	-9.34442	Mitochondrial endonuclease
AO090026000471	10.5526	Ortholog(s) have mitochondrion localization		AO090026000449	-9.42718	Ortholog(s) have GTP-Rho binding, phosphatidylinositol-4,5-bisphosphate binding activity and role in Golgi to plasma membrane transport, Rho protein signal transduction, exocyst assembly, exocyst localization
AO090023000760	10.5737	Ortholog of A. nidulans FGSC A4 : AN3834, A. fumigatus Af293 : Afu4g08090, A. niger CBS 513.88 : An04g02530, Aspergillus wentii : Aspwe1_0064360 and Aspergillus sydowii : Aspsy1_0057405		AO090701000831	-9.42973	Putative polyketide synthase (PKS), encoded in a predicted secondary metabolite gene cluster
AO090038000597	10.5991	Ortholog(s) have role in rRNA processing, ribosomal small subunit assembly and CURI complex, UTP-C complex localization		AO090005001530	-9.49453	Ortholog(s) have role in trehalose biosynthetic process
AO090701000277	10.6248	Has domain(s) with predicted magnesium ion transmembrane transporter activity, role in magnesium ion transport and integral component of membrane localization		AO090012000711	-9.53774	Has domain(s) with predicted aldehyde-lyase activity and role in carbohydrate metabolic process
AO090005001594	10.6349	Has domain(s) with predicted catalytic activity and role in biosynthetic process		AO090102000016	-9.55069	Ortholog of Aspergillus flavus NRRL 3357 : AFL2T_09472, Aspergillus wentii : Aspwe1_0032903, Aspergillus versicolor : Aspve1_0033917 and Aspergillus sydowii : Aspsy1_1164393
AO090701000132	10.6552	Ortholog(s) have role in endocytosis and Golgi apparatus, cytosol, endocytic vesicle, nucleus localization		AO090120000363	-9.567	Putative catalytic subunit of mRNA decapping enzyme
AO090003000284	10.7001	protein of unknown function		AO090012000572	-9.57969	Ortholog(s) have role in cellular protein localization, septation initiation signaling and mitotic spindle pole body localization
AO090005000090	10.7057	Ortholog(s) have mitochondrion localization		AO090113000084	-9.58314	Has domain(s) with predicted oxidoreductase activity and role in oxidation-reduction process
AO090023000681	10.7156	Has domain(s) with predicted transporter activity, role in transmembrane transport and integral component of membrane, plasma membrane localization		AO090012000652	-9.61935	Ortholog of A. nidulans FGSC A4 : AN2501, Aspergillus sydowii : Aspsy1_0087107, Aspergillus terreus NIH2624 : ATET_04017 and Aspergillus carbonarius ITEM 5010 : Acar5010_208778
AO090005001035	10.7408	Ortholog of A. nidulans FGSC A4 : AN0977, A. fumigatus Af293 : Afu1g16650, A. niger CBS 513.88 : An01g10460, Aspergillus wentii : Aspwe1_0068230 and Aspergillus sydowii : Aspsy1_0053392		AO090012000866	-9.62046	Ortholog of A. nidulans FGSC A4 : AN1288, A. fumigatus Af293 : Afu1g09770, A. niger CBS 513.88 : An08g01580, Aspergillus wentii : Aspwe1_0036503 and Aspergillus sydowii : Aspsy1_0025457
AO090023000691	10.7824	Ortholog of A. nidulans FGSC A4 : AN1684, A. fumigatus Af293 : Afu4g08650, A. niger CBS 513.88 : An04g03490, Aspergillus wentii : Aspwe1_0167016 and Aspergillus sydowii : Aspsy1_0026068		AO090038000281	-9.63233	Ortholog of A. nidulans FGSC A4 : AN8776, A. niger CBS 513.88 : An08g03560, Aspergillus wentii : Aspwe1_0508022, Aspergillus sydowii : Aspsy1_0035009 and Aspergillus terreus NIH2624 : ATET_00334
AO090011000902	10.8166	Ortholog(s) have role in regulation of translational elongation and cytosolic ribosome, extracellular region, mitochondrion localization		AO090023000349	-9.71134	Has domain(s) with predicted catalytic activity and role in metabolic process
AO090701000006	10.8948	Has domain(s) with predicted role in vesicle docking involved in exocytosis and exocyst localization		AO090020000323	-9.71761	Ortholog(s) have RNA polymerase II core promoter proximal region sequence-specific DNA binding and RNA polymerase II transcription factor activity, more
AO090010000057	11.1121	Ortholog of Aspergillus flavus NRRL 3357 : AFL2T_11324 and Aspergillus versicolor : Aspve1_0762283		AO090005000620	-9.72074	Ortholog of A. nidulans FGSC A4 : AN1520, A. fumigatus Af293 : Afu8g05290, A. niger CBS 513.88 : An16g07440, Aspergillus wentii : Aspwe1_0045135 and Aspergillus sydowii : Aspsy1_0145694
AO090001000766	11.1359	Putative protein factor similar to Hrp1p involved in pre-mRNA 3&#8242		AO090103000104	-9.7889	Has domain(s) with predicted acyl-CoA dehydrogenase activity, flavin adenine dinucleotide binding, oxidoreductase activity, acting on the CH-CH group of donors activity and role in oxidation-reduction process
AO090026000510	11.1907	Ortholog(s) have role in endonucleolytic cleavage in ITS1 to separate SSU-rRNA from 5.8S rRNA and LSU-rRNA from tricistronic rRNA transcript (SSU-rRNA, 5.8S rRNA, LSU-rRNA)		AO090120000164	-9.79188	Has domain(s) with predicted triglyceride lipase activity and role in lipid metabolic process
AO090012000660	11.3891	Ortholog(s) have calcium-dependent cysteine-type endopeptidase activity		AO090009000238	-9.83774	protein of unknown function
AO090023000980	11.3904	Ortholog(s) have dipeptidyl-peptidase activity and cytoplasm, nucleus localization		AO090023000782	-9.88499	Has domain(s) with predicted syntaxin binding activity
AO090020000558	11.392	Ortholog(s) have mitochondrion localization		AO090009000595	-9.94507	Ortholog(s) have mRNA binding activity and role in ascospore formation, conjugation with cellular fusion, ribosomal large subunit assembly, ribosomal subunit export from nucleus
AO090001000546	11.4115	Ortholog(s) have S-methyl-5-thioadenosine phosphorylase activity, mRNA binding activity and role in L-methionine biosynthetic process from methylthioadenosine, glutamate biosynthetic process		AO090005001540	-10.0113	Has domain(s) with predicted 1-phosphatidylinositol binding, clathrin binding, phospholipid binding activity, role in clathrin coat assembly and clathrin coat, clathrin-coated vesicle localization
AO090010000465	11.4264	Ortholog(s) have alpha-1,2-mannosyltransferase activity		AO090020000384	-10.0121	Ortholog(s) have role in cellular response to biotic stimulus, cellular response to starvation and filamentous growth of a population of unicellular organisms in response to biotic stimulus, more
AO090011000382	11.4509	Has domain(s) with predicted RNA polymerase II transcription factor activity, sequence-specific DNA binding, zinc ion binding activity, role in regulation of transcription, DNA-templated and nucleus localization		AO090010000760	-10.0612	Ortholog(s) have acetylglucosaminyltransferase activity, role in protein N-linked glycosylation and Golgi medial cisterna localization
AO090026000578	11.4754	Ortholog(s) have role in chanoclavine-I biosynthetic process, emericellamide A biosynthetic process		AO090023000259	-10.1005	Ortholog(s) have role in cellular response to drug, conidium formation, hyphal growth, pathogenesis, regulation of conidium formation
AO090012000836	11.4881	Has domain(s) with predicted intracellular localization		AO090011000608	-10.1005	Ortholog(s) have role in TOR signaling, mitotic cell cycle arrest in response to nitrogen starvation and negative regulation of autophagy, more
AO090102000557	11.4909	Ortholog(s) have methylenetetrahydrofolate reductase (NAD(P)H) activity and role in methionine biosynthetic process, one-carbon metabolic process		AO090010000229	-10.1296	Ortholog(s) have dipeptide transmembrane transporter activity, tripeptide transporter activity and role in dipeptide transmembrane transport, tripeptide transport
AO090120000086	11.5616	Ortholog of A. nidulans FGSC A4 : AN8670, A. fumigatus Af293 : Afu6g02050, Aspergillus wentii : Aspwe1_0311425, Aspergillus sydowii : Aspsy1_0157483 and Aspergillus terreus NIH2624 : ATET_07247		AO090011000858	-10.1738	Has domain(s) with predicted ubiquitinyl hydrolase activity and role in protein deubiquitination, ubiquitin-dependent protein catabolic process
AO090023000073	11.5868	Ortholog of A. nidulans FGSC A4 : AN1594, AN9314, A. fumigatus Af293 : Afu5g15060, A. niger CBS 513.88 : An18g02710, Neosartorya fischeri NRRL 181 : NFIA_009790 and Aspergillus wentii : Aspwe1_0054582		AO090102000525	-10.2232	Ortholog(s) have pyruvate dehydrogenase (acetyl-transferring) kinase activity, role in carbon utilization, negative regulation of catalytic activity, peptidyl-serine phosphorylation and mitochondrion localization
AO090026000361	11.6775	Ortholog(s) have endoplasmic reticulum localization		AO090701000163	-10.2327	Ortholog(s) have GTP binding, signal recognition particle binding activity, role in protein targeting to ER and cytosol, nucleus, signal recognition particle receptor complex localization
AO090206000082	11.704	Ortholog(s) have cytosol, nucleus localization		AO090026000455	-10.2585	Ortholog(s) have glucosidase activity and role in (1->6)-beta-D-glucan biosynthetic process, cell separation after cytokinesis, fungal-type cell wall organization
AO090102000611	11.7834	Ortholog(s) have cytosol localization		AO090026000554	-10.3327	Ortholog of A. nidulans FGSC A4 : AN5900, A. fumigatus Af293 : Afu2g11100, A. niger CBS 513.88 : An02g03000, Aspergillus wentii : Aspwe1_0071487 and Aspergillus sydowii : Aspsy1_0151794
AO090023000528	11.8685	Putative nonribosomal peptide synthase (NRPS)		AO090005000374	-10.3884	Has domain(s) with predicted RNA polymerase II transcription factor activity, sequence-specific DNA binding, zinc ion binding activity, role in regulation of transcription, DNA-templated and nucleus localization
AO090120000354	11.9109	Ortholog(s) have isopropylmalate transmembrane transporter activity, malonate(1-) transmembrane transporter activity, oxaloacetate transmembrane transporter activity, sulfate transmembrane transporter activity		AO090001000427	-10.4915	Ortholog(s) have rRNA binding activity and role in conjugation with cellular fusion, maturation of LSU-rRNA from tricistronic rRNA transcript (SSU-rRNA, 5.8S rRNA, LSU-rRNA), regulation of cell size, ribosomal large subunit assembly
AO090012000947	11.9222	Ortholog(s) have cyclin-dependent protein serine/threonine kinase inhibitor activity		AO090023000972	-10.5109	Has domain(s) with predicted sequence-specific DNA binding, transcription factor activity, sequence-specific DNA binding activity and role in regulation of transcription, DNA-templated
AO090005000631	11.9651	Ortholog of A. nidulans FGSC A4 : AN1509, A. fumigatus Af293 : Afu8g05120, A. niger CBS 513.88 : An16g07630, Aspergillus wentii : Aspwe1_0044080 and Aspergillus sydowii : Aspsy1_0028718		AO090001000578	-10.5148	Ortholog(s) have GPI-anchor transamidase activity and role in attachment of GPI anchor to protein, conidium formation, fungal-type cell wall organization, fungal-type cell wall polysaccharide biosynthetic process, regulation of growth rate
AO090103000040	12.0573	Ortholog of A. nidulans FGSC A4 : AN1436, A. fumigatus Af293 : Afu8g04250, A. niger CBS 513.88 : An16g08840, Aspergillus wentii : Aspwe1_0043834 and Aspergillus sydowii : Aspsy1_0028799		AO090003000382	-10.5716	Ortholog of A. nidulans FGSC A4 : AN10454, A. fumigatus Af293 : Afu6g12650, A. niger CBS 513.88 : An06g01860, Neosartorya fischeri NRRL 181 : NFIA_058610 and Aspergillus wentii : Aspwe1_0033674
AO090701000684	12.1272	Ortholog of A. nidulans FGSC A4 : AN11022, A. fumigatus Af293 : Afu5g07770, Neosartorya fischeri NRRL 181 : NFIA_079500 and Aspergillus clavatus NRRL 1 : ACLA_012740		AO090003001049	-10.5904	Ortholog of A. nidulans FGSC A4 : AN5568, A. fumigatus Af293 : Afu4g11700, A. niger CBS 513.88 : An04g04540, Aspergillus wentii : Aspwe1_0033982 and Aspergillus sydowii : Aspsy1_0879955
AO090005001565	12.3624	Ortholog(s) have structural constituent of ribosome activity and mitochondrial small ribosomal subunit localization		AO090001000273	-10.647	Has domain(s) with predicted oxidoreductase activity, transferase activity, transferring acyl groups other than amino-acyl groups, zinc ion binding activity and role in oxidation-reduction process
AO090003000257	13.3034	ER localized chaperone (BiP)		AO090103000091	-10.6492	Ortholog of A. nidulans FGSC A4 : AN2942, AN10320, AN7130 and A. fumigatus Af293 : Afu3g15110, Afu4g08715
AO090038000561	13.7155	Ortholog(s) have Golgi apparatus, cell tip, cytoplasmic vesicle, endoplasmic reticulum, plasma membrane localization		AO090005001531	-10.6902	Has domain(s) with predicted catalytic activity and role in trehalose biosynthetic process
AO090005000871	13.7198	Ortholog of A. nidulans FGSC A4 : AN3481, A. fumigatus Af293 : Afu1g02290, Afu2g01405, A. niger CBS 513.88 : An01g05960 and A. oryzae RIB40 : AO090026000175, AO090026000055		AO090120000300	-10.7755	Ortholog(s) have Rho guanyl-nucleotide exchange factor activity, role in actomyosin contractile ring assembly, regulation of actomyosin contractile ring contraction and contractile ring localization
				AO090011000290	-10.8502	Ortholog(s) have Prp19 complex, spliceosomal complex localization
				AO090023000964	-10.8568	Ortholog(s) have polyubiquitin binding activity and role in double-strand break repair via single-strand annealing, removal of nonhomologous ends, nucleotide-excision repair, response to UV
				AO090003000753	-10.8906	Has domain(s) with predicted oxidoreductase activity
				AO090003001103	-10.9654	Ortholog(s) have cytosol, nucleus localization
				AO090003001314	-10.9903	Ortholog of A. nidulans FGSC A4 : AN8048, A. fumigatus Af293 : Afu5g02070, A. niger CBS 513.88 : An02g11210, Aspergillus wentii : Aspwe1_0174218 and Aspergillus sydowii : Aspsy1_0155996
				AO090701000835	-11.0109	Has domain(s) with predicted transferase activity, transferring acyl groups activity and role in metabolic process
				AO090005000843	-11.0844	Ortholog(s) have Ddb1-Wdr21 complex, cytosol localization
				AO090023001011	-11.0948	Ortholog(s) have role in telomere maintenance and nuclear telomere cap complex, nuclear telomeric heterochromatin, nucleolus localization
				AO090011000598	-11.0987	Has domain(s) with predicted catalytic activity and role in metabolic process
				AO090001000737	-11.17	Ortholog(s) have role in CENP-A containing nucleosome assembly, chromatin maintenance, chromatin silencing at centromere, mitotic sister chromatid segregation and nucleoplasm localization
				AO090003000440	-11.3178	Ortholog of A. nidulans FGSC A4 : AN5496, A. fumigatus Af293 : Afu6g13150, A. niger CBS 513.88 : An08g10330, Aspergillus wentii : Aspwe1_0047133 and Aspergillus sydowii : Aspsy1_0030495
				AO090023000908	-11.3437	Ortholog(s) have NAD transporter activity, pyruvate secondary active transmembrane transporter activity, role in NAD transmembrane transport, mitochondrial pyruvate transport and endoplasmic reticulum, mitochondrion localization
				AO090102000583	-11.3498	Ortholog of A. nidulans FGSC A4 : AN8237, A. fumigatus Af293 : Afu5g03730, A. niger CBS 513.88 : An09g06430, Aspergillus wentii : Aspwe1_0114603 and Aspergillus sydowii : Aspsy1_0161802
				AO090701000081	-11.3765	Ortholog(s) have role in medium-chain fatty acid biosynthetic process
				AO090009000286	-11.4169	Has domain(s) with predicted nucleic acid binding, zinc ion binding activity
				AO090011000350	-11.4933	Guanine deaminase
				AO090001000525	-11.4976	Ortholog(s) have metalloendopeptidase activity, role in cellular iron ion homeostasis, protein processing involved in protein targeting to mitochondrion, protein stabilization and mitochondrial matrix localization
				AO090001000225	-11.56	Ortholog(s) have protein heterodimerization activity and role in heteroduplex formation, meiotic DNA recombinase assembly, reciprocal meiotic recombination, telomere maintenance via recombination
				AO090011000046	-11.56	Has domain(s) with predicted aspartic-type endopeptidase activity, catalytic activity, transferase activity and role in metabolic process, proteolysis
				AO090038000398	-11.5877	Ortholog(s) have U1 snRNP localization
				AO090003000431	-11.59	Ortholog of A. nidulans FGSC A4 : AN10689, A. fumigatus Af293 : Afu6g13060, A. niger CBS 513.88 : An08g10410, Aspergillus wentii : Aspwe1_0099545 and Aspergillus terreus NIH2624 : ATET_03336
				AO090012000621	-11.6876	Ortholog of A. nidulans FGSC A4 : AN1010, A. fumigatus Af293 : Afu1g12870, A. niger CBS 513.88 : An08g05690, Aspergillus wentii : Aspwe1_0027873 and Aspergillus sydowii : Aspsy1_0053360
				AO090012000819	-11.7353	Ortholog of A. nidulans FGSC A4 : AN3142, A. fumigatus Af293 : Afu3g13100, A. niger CBS 513.88 : An02g09000, Aspergillus wentii : Aspwe1_0050035 and Aspergillus sydowii : Aspsy1_0056138
				AO090026000325	-11.7562	Ortholog(s) have nucleotidase activity, role in pyrimidine nucleobase metabolic process and cytosol, nucleus localization
				AO090005001583	-11.9877	Ortholog(s) have cytosol, nucleus localization
				AO090009000388	-11.9903	Has domain(s) with predicted DNA binding activity
				AO090701000190	-12.1156	Has domain(s) with predicted role in transmembrane transport and integral component of membrane localization
				AO090701000444	-12.1931	Ortholog(s) have endoplasmic reticulum localization
				AO090012000208	-12.2364	Ortholog(s) have 4 iron, 4 sulfur cluster binding, ATPase activity, iron ion binding activity, role in iron-sulfur cluster assembly, tRNA wobble uridine modification and Nbp35-Cfd1 ATPase complex, cytosol, nucleus localization
				AO090012000842	-12.4857	Ortholog(s) have cell division site, cytosol, nucleus localization
				AO090701000533	-12.5857	Ortholog of A. nidulans FGSC A4 : AN8726, A. fumigatus Af293 : Afu7g00440, Afu8g06090, Afu8g06580, A. niger CBS 513.88 : An02g08340, An02g09540, An03g00430 and A. oryzae RIB40 : AO090011000231, AO090011000243
				AO090012000715	-12.9404	Ortholog(s) have acetyl-CoA C-acyltransferase activity, mRNA binding activity, role in fatty acid beta-oxidation and glyoxysome, mitochondrial intermembrane space, peroxisomal matrix localization
				AO090003001006	-13.1051	Has domain(s) with predicted UDP-N-acetylmuramate dehydrogenase activity, catalytic activity, flavin adenine dinucleotide binding activity and role in oxidation-reduction process
				AO090120000469	-13.1364	Sensor of ambient pH
				AO090010000644	-13.6011	Predicted aspartic-type endopeptidase
				AO090003000205	-13.6633	Cytochrome P450 monooxygenase
				AO090012000623	-13.6914	Ortholog(s) have nitrate transmembrane transporter activity, nitrite uptake transmembrane transporter activity, voltage-gated channel activity and role in nitrate transport, nitrite transport
				AO090005001212	-13.7367	Ortholog of A. nidulans FGSC A4 : AN0856, A. fumigatus Af293 : Afu1g15300, A. niger CBS 513.88 : An01g13290, Aspergillus wentii : Aspwe1_0171741 and Aspergillus sydowii : Aspsy1_0083924
				AO090010000333	-14.6098	Ortholog(s) have purine nucleobase transmembrane transporter activity, role in hypoxanthine transport and Golgi apparatus, fungal-type vacuole, plasma membrane localization
